# Supplementary material for: The evolutionary footprint of influenza A subtype H3N2 strains in Bangladesh: implication of vaccine strain selection
Source: Springer Nature journal article supplement (doi:10.1038/s41598-022-20179-7), 2022-09-28
Supplement: 41598_2022_20179_MOESM1_ESM.pdf [file 41598_2022_20179_MOESM1_ESM.pdf]

# Appendix of

## The evolutionary footprint of Influenza A subtype H3N2 strains in Bangladesh: implication of vaccine strain selection

Sezanur Rahman<sup>1</sup>, Mehedi Hasan<sup>1</sup>, Md Shaheen Alam<sup>1</sup>, K M Main Uddin<sup>1</sup>, Sayra Moni<sup>1</sup>,  
Mustafizur Rahman<sup>1,2,\*</sup>

<sup>1</sup>Virology Laboratory, Infectious Diseases Division, icddr,b, Mohakhali, Dhaka-1212, Bangladesh

<sup>2</sup>Genome Centre, icddr,b, Mohakhali, Dhaka-1212, Bangladesh

\*Correspondence to: Mustafizur Rahman, 68 Shaheed Tajuddin Ahmed Sarani, Dhaka 1212, Bangladesh; mustafizur@icddr.org; Telephone number: +880 2 9840523-32

### Table of contents

| Heading    | Topics                                                                                                                                           | Page  |
|------------|--------------------------------------------------------------------------------------------------------------------------------------------------|-------|
| Appendix A | Evidence before this study                                                                                                                       | 02-02 |
|            | Table A1: MEDLINE (PubMed) search strategy (11.11.2021)                                                                                          | 02    |
|            | Table A2: Previously reported substitution rate                                                                                                  | 02    |
| Appendix B | Supplementary data                                                                                                                               | 02-02 |
|            | Table B1: Evolutionary Rate of HA gene from whom (South and Southeast Asian country) potential vaccine (p-vac) was selected. (Jan 2015-Dec 2020) | 02    |
|            | Figure B1: Mximum Likelihood tree of BD strains and vaccine strains from 2009 to 2020.                                                           | 03    |
| Appendix C | Insilico analysis and validation                                                                                                                 | 04-07 |
|            | Table C1: Binding Affinity of epitopes after amino acid substitutions                                                                            | 04    |
|            | Table C2: Structure validations, Result from MolProbdity Serve                                                                                   | 06    |
| Appendix D | Data in open access server/ Accession numbers                                                                                                    | 08-43 |
|            | Dataset 1: Accession numbers of global HA sequences (n= 596) used for Time-scaled phylogenies.                                                   | 08    |
|            | Dataset 2: Selected potential vaccine candidate (p-vac) from each season.                                                                        | 14    |
|            | Dataset 3: Sequences from 2015-16 to 2019-20 seasons                                                                                             | 15    |
|            | Dataset 4: Accession numbers of Bangladeshi strains (n=531) collected from 2009 to 2020                                                          | 15    |
|            | Dataset 5: Accession numbers of South-South East Asian strains used to track evolutionary rate for HA gene (Jan 2015-Dec 2020)                   | 37    |
| References |                                                                                                                                                  | 44    |

## Appendix A: Evidence before this study

**Table A1: MEDLINE (PubMed) search strategy (11.11.2021)**

| Search number | Search Details                                                                                                                                              | Results |
|---------------|-------------------------------------------------------------------------------------------------------------------------------------------------------------|---------|
| 1             | (H3N2[Title]) AND (influenza[Title])                                                                                                                        | 1,494   |
| 2             | ((phylogen*) OR (evolution*)) OR (nucleotide substitution*)                                                                                                 | 854,286 |
| 3             | (search 1) AND (search 2)                                                                                                                                   | 412     |
| 4             | (search 1) AND (search 2) Filters with_<br>(i) SPECIES: Humans; (ii) PUBLICATION DATE: 5 years; (iii) ARTICLE TYPE: Journal Article; (iv) LANGUAGE: English | 82      |

**Table A2: Previously reported substitution rate**

| Country/ Region              | Time      | Substitution rate<br>(nucleotide<br>substitutions/ site/year) | Reference |
|------------------------------|-----------|---------------------------------------------------------------|-----------|
| Australia                    | 2003-2017 | $6.44 \times 10^{-3}$                                         | 1         |
| Indonesia                    | 2008-2010 | $3.27 \times 10^{-3}$                                         | 2         |
| Korea                        | 2009-2012 | $4.84 \times 10^{-3}$                                         | 3         |
| Switzerland                  | 2016/2017 | $2.90 \times 10^{-3}$                                         | 4         |
| Middle East and North Africa | 2009-2017 | $1.47 \times 10^{-3}$                                         | 5         |
| Global (n=254)               | 1968-2015 | $0.50 \times 10^{-3}$                                         | 6         |
| Kenya                        | 2007-2013 | $4.17 \times 10^{-3}$                                         | 7         |
| Global (n=284)               | 1968-2011 | $3.99 \times 10^{-3}$                                         | 8         |

## Appendix B: Supplementary data

Only complete HA gene sequences available on GISAID (**List of accession number in Dataset 5**) were considered for evolutionary rate analysis (Table B1). An uncorrelated relaxed clock log-normal molecular clock model with coalescent Bayesian skyline prior was used through a Markov Chain Monte Carlo (MCMC) framework in BEAST (v2.6.3). MCMC chains were run for 10 million steps, sampling every 10,000 steps from the posterior distribution to ensure adequate mixing of model parameters.

**Table B1: Evolutionary Rate of HA gene (Jan 2015-Dec 2020)**

| Country    | Number of sequences | Evolutionary Rate<br>(95%HPD)     | dN/dS |
|------------|---------------------|-----------------------------------|-------|
| Bangladesh | 700                 | $4.97 \times 10^{-3}$ (4.23-5.73) | 0.81  |
| India      | 139                 | $8.29 \times 10^{-3}$ (6.54-9.99) | 0.76  |
| Singapore  | 680                 | $4.31 \times 10^{-3}$ (3.74-5.13) | 0.81  |
| Thailand   | 502                 | $4.25 \times 10^{-3}$ (3.78-4.70) | 0.75  |

We have constructed another phylogenetic tree using a generalized time-reversible (GTR) substitution model.

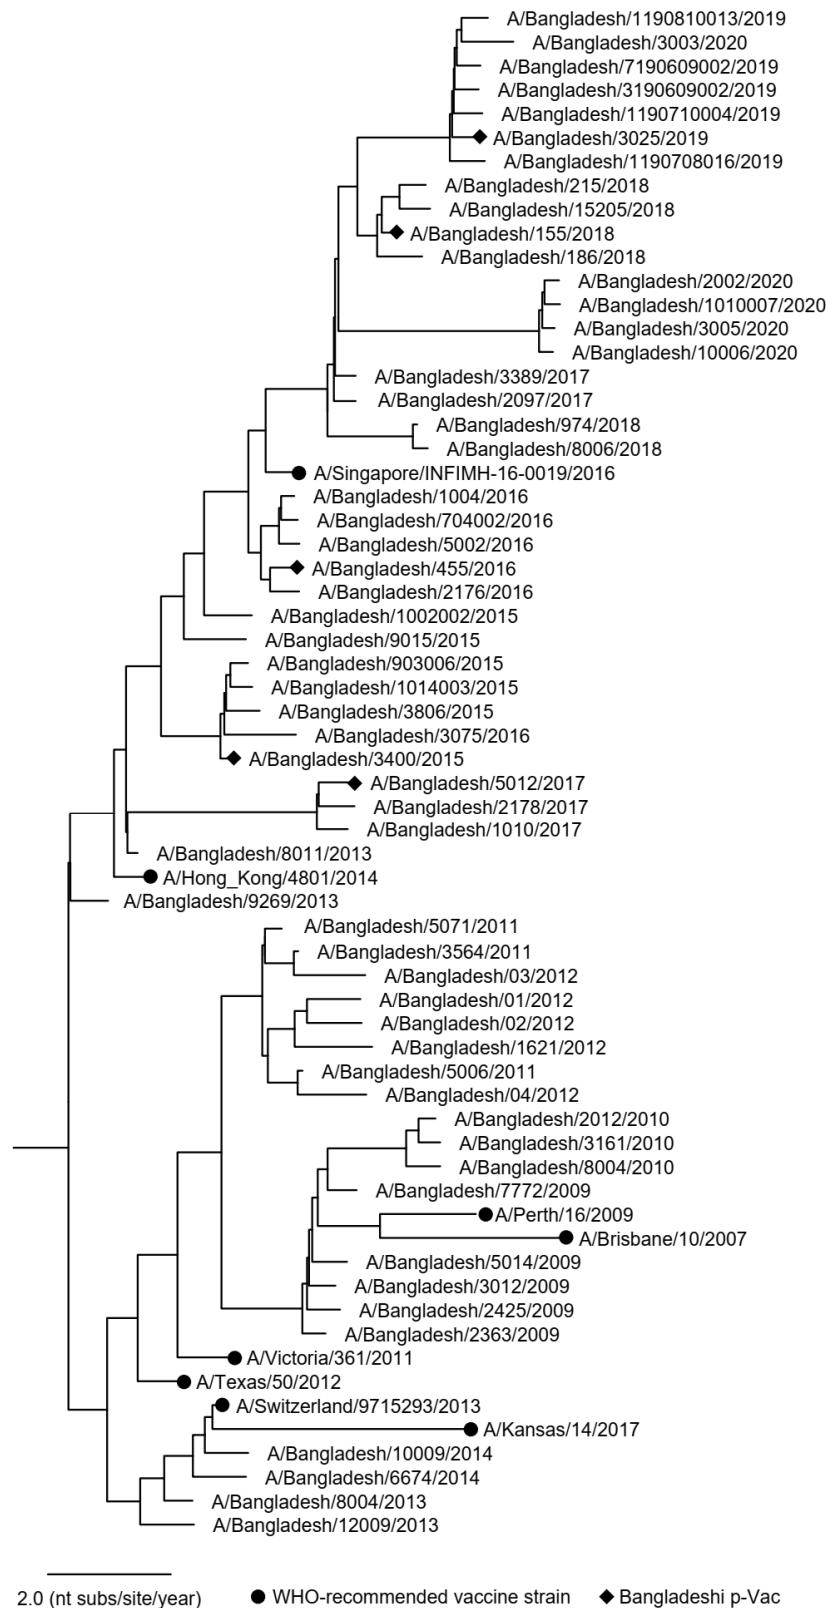

**Figure B1: Mximum Likelihood tree of BD strains and vaccine strains from 2009 to 2020.**

## Appendix C: Insilco analysis and validation.

**Table C1: Binding Affinity of epitopes after amino acid substitutions**

|                  | Amino acid substitutions | 1st Pose | 2nd Pose | 3rd Pose | 4th Pose | 5th Pose | 6th Pose | 7th Pose | 8th Pose | 9th Pose |
|------------------|--------------------------|----------|----------|----------|----------|----------|----------|----------|----------|----------|
| <b>Epitope A</b> | 147 A                    | -7       | -6.8     | -6.6     | -6.6     | -6.6     | -6.4     | -6.4     | -6.3     | -6.3     |
|                  | 147 F                    | -7.2     | -7       | -6.9     | -6.9     | -6.9     | -6.8     | -6.8     | -6.5     | -6.4     |
|                  | 147 G                    | -7       | -6.9     | -6.7     | -6.5     | -6.5     | -6.4     | -6.3     | -6.2     | -6       |
|                  | 147 I                    | -7.1     | -6.9     | -6.8     | -6.7     | -6.7     | -6.7     | -6.6     | -6.6     | -6.5     |
|                  | 147 L                    | -7       | -7       | -6.9     | -6.7     | -6.6     | -6.5     | -6.5     | -6.5     | -6.4     |
|                  | 147 M                    | -7       | -6.8     | -6.8     | -6.7     | -6.7     | -6.6     | -6.5     | -6.5     | -6.1     |
|                  | 147 P                    | -7       | -6.9     | -6.8     | -6.2     | -6.2     | -6.2     | -6.1     | -6       | -6       |
|                  | 147 V                    | -6.9     | -6.9     | -6.7     | -6.6     | -6.6     | -6.5     | -6.4     | -6.4     | -6.4     |
|                  | 147 W                    | -7       | -6.7     | -6.6     | -6.6     | -6.6     | -6.5     | -6.5     | -6.3     | -6.3     |
|                  | 147 C                    | -7       | -6.9     | -6.9     | -6.8     | -6.7     | -6.6     | -6.5     | -6.5     | -6.4     |
|                  | 147 N                    | -7       | -6.9     | -6.9     | -6.7     | -6.6     | -6.4     | -6.4     | -6.4     | -6.3     |
|                  | 147 Q                    | -7.1     | -7.1     | -6.9     | -6.6     | -6.5     | -6.3     | -6.3     | -6.2     | -6.1     |
|                  | 147 S                    | -7.1     | -7.1     | -7       | -6.9     | -6.9     | -6.8     | -6.8     | -6.6     | -6.6     |
|                  | 147 T                    | -7       | -6.9     | -6.8     | -6.8     | -6.8     | -6.7     | -6.7     | -6.6     | -6.5     |
|                  | 147 Y                    | -6.9     | -6.9     | -6.7     | -6.7     | -6.5     | -6.4     | -6.3     | -6.2     | -6.2     |
|                  | 147 D                    | -7       | -6.7     | -6.7     | -6.7     | -6.4     | -6.4     | -6.4     | -6.2     | -6.2     |
|                  | 147 E                    | -7       | -7       | -6.9     | -6.8     | -6.8     | -6.7     | -6.6     | -6.6     | -6.4     |
|                  | 147 H                    | -7       | -6.7     | -6.6     | -6.6     | -6.5     | -6.3     | -6.3     | -6.2     | -6.1     |
| 147 K            | -6.4                     | -6.2     | -6.1     | -5.8     | -5.7     | -5.6     | -5.6     | -5.5     | -5.5     |          |
| 147 R            | -7.1                     | -7.1     | -6.9     | -6.8     | -6.7     | -6.7     | -6.7     | -6.6     | -6.6     |          |
| <b>Epitope B</b> | 160 A                    | -7.1     | -7       | -7       | -6.7     | -6.7     | -6.7     | -6.7     | -6.5     | -6.5     |
|                  | 160 F                    | -7       | -6.9     | -6.9     | -6.8     | -6.7     | -6.7     | -6.4     | -6.3     | -6.3     |
|                  | 160 G                    | -6.6     | -6.6     | -6.6     | -6.5     | -6.3     | -6.2     | -6.1     | -6       | -6       |
|                  | 160 I                    | -7       | -6.9     | -6.9     | -6.9     | -6.7     | -6.6     | -6.5     | -6.5     | -6.4     |
|                  | 160 L                    | -7.1     | -7       | -6.9     | -6.7     | -6.6     | -6.6     | -6.5     | -6.4     | -6.2     |
|                  | 160 M                    | -6.4     | -6.4     | -6.3     | -6.3     | -6.2     | -6.2     | -6.2     | -6.1     | -6       |
|                  | 160 P                    | -6.9     | -6.8     | -6.8     | -6.6     | -6.5     | -6.2     | -6.1     | -6.1     | -5.9     |
|                  | 160 V                    | -6.9     | -6.8     | -6.8     | -6.6     | -6.5     | -6.5     | -6.4     | -6.3     | -6.3     |
|                  | 160 W                    | -6.9     | -6.8     | -6.7     | -6.7     | -6.6     | -6.3     | -6.2     | -6.2     | -6.1     |
|                  | 160 C                    | -6.9     | -6.9     | -6.7     | -6.7     | -6.7     | -6.5     | -6.5     | -6.4     | -6.4     |
|                  | 160 N                    | -7       | -6.8     | -6.8     | -6.7     | -6.6     | -6.4     | -6.3     | -6.3     | -6.2     |
|                  | 160 Q                    | -6.9     | -6.6     | -6.6     | -6.5     | -6.4     | -6.3     | -6.2     | -6.2     | -6.2     |
|                  | 160 S                    | -6.7     | -6.4     | -6.4     | -6.2     | -6.2     | -6.1     | -6.1     | -6.1     | -6       |
|                  | 160 T                    | -7       | -6.7     | -6.4     | -6.3     | -6.2     | -6.2     | -6.1     | -6.1     | -6.1     |
|                  | 160 Y                    | -6.9     | -6.8     | -6.8     | -6.7     | -6.6     | -6.5     | -6.5     | -6.5     | -6.4     |
|                  | 160 D                    | -6.9     | -6.7     | -6.6     | -6.6     | -6.6     | -6.3     | -6.2     | -6.1     | -6.1     |
|                  | 160 E                    | -7.1     | -7.1     | -6.9     | -6.9     | -6.8     | -6.7     | -6.7     | -6.6     | -6.6     |
|                  | 160 H                    | -7.2     | -7       | -6.9     | -6.9     | -6.6     | -6.5     | -6.4     | -6.4     | -6.4     |
| 160 K            | -6.9                     | -6.8     | -6.8     | -6.5     | -6.5     | -6.4     | -6.3     | -6.3     | -6.2     |          |
| 160 R            | -7.1                     | -7       | -6.9     | -6.9     | -6.9     | -6.8     | -6.7     | -6.7     | -6.4     |          |

|                  | Amino acid substitutions | 1st Pose | 2nd Pose | 3rd Pose | 4th Pose | 5th Pose | 6th Pose | 7th Pose | 8th Pose | 9th Pose |
|------------------|--------------------------|----------|----------|----------|----------|----------|----------|----------|----------|----------|
| <b>Epitope D</b> | 214 A                    | -6.3     | -6.1     | -5.9     | -5.9     | -5.6     | -5.6     | -5.6     | -5.6     | -5.5     |
|                  | 214 F                    | -7       | -6.9     | -6.9     | -6.9     | -6.9     | -6.7     | -6.7     | -6.7     | -6.6     |
|                  | 214 G                    | -7.1     | -6.9     | -6.9     | -6.8     | -6.8     | -6.7     | -6.6     | -6.5     | -6.5     |
|                  | 214 I                    | -7.1     | -7       | -7       | -6.9     | -6.8     | -6.6     | -6.5     | -6.5     | -6.5     |
|                  | 214 L                    | -7.1     | -6.9     | -6.8     | -6.5     | -6.3     | -6.3     | -6.2     | -6.2     | -6.1     |
|                  | 214 M                    | -7.1     | -6.9     | -6.9     | -6.9     | -6.8     | -6.8     | -6.7     | -6.6     | -6.5     |
|                  | 214 P                    | -7.1     | -7       | -7       | -6.8     | -6.6     | -6.6     | -6.6     | -6.4     | -6.4     |
|                  | 214 V                    | -7       | -6.9     | -6.7     | -6.7     | -6.6     | -6.6     | -6.5     | -6.4     | -6.3     |
|                  | 214 W                    | -7.1     | -7       | -6.9     | -6.8     | -6.7     | -6.6     | -6.6     | -6.5     | -6.4     |
|                  | 214 C                    | -6.2     | -6.2     | -6.2     | -6       | -5.9     | -5.9     | -5.7     | -5.7     | -5.6     |
|                  | 214 N                    | -6.9     | -6.9     | -6.8     | -6.7     | -6.5     | -6.4     | -6.4     | -6.4     | -6.3     |
|                  | 214 Q                    | -6.3     | -6.2     | -5.9     | -5.8     | -5.8     | -5.6     | -5.5     | -5.4     | -5.3     |
|                  | 214 S                    | -6.9     | -6.9     | -6.9     | -6.9     | -6.6     | -6.6     | -6.5     | -6.4     | -6.4     |
|                  | 214 T                    | -6.9     | -6.7     | -6.7     | -6.5     | -6.5     | -6.5     | -6.3     | -6.2     | -6.2     |
|                  | 214 Y                    | -6.9     | -6.8     | -6.7     | -6.7     | -6.6     | -6.4     | -6.3     | -6.2     | -6.2     |
|                  | 214 D                    | -7       | -6.9     | -6.7     | -6.4     | -6.4     | -6.3     | -6.2     | -6.2     | -6.2     |
|                  | 214 E                    | -7.2     | -6.9     | -6.8     | -6.8     | -6.7     | -6.6     | -6.5     | -6.3     | -6.3     |
|                  | 214 H                    | -7.2     | -7       | -6.9     | -6.8     | -6.6     | -6.6     | -6.5     | -6.5     | -6.5     |
| 214 K            | -7                       | -6.9     | -6.9     | -6.9     | -6.8     | -6.7     | -6.7     | -6.7     | -6.3     |          |
| 214 R            | -7.2                     | -7.1     | -7       | -6.9     | -6.9     | -6.8     | -6.8     | -6.8     | -6.8     |          |
| <b>Epitope E</b> | 69 A                     | -6.7     | -6.4     | -6.3     | -6.3     | -6.3     | -6.1     | -6.1     | -6.1     | -6.1     |
|                  | 69 F                     | -7       | -7       | -6.9     | -6.7     | -6.6     | -6.5     | -6.5     | -6.3     | -6.2     |
|                  | 69 G                     | -7.1     | -7       | -6.8     | -6.8     | -6.7     | -6.6     | -6.4     | -6.4     | -6.4     |
|                  | 69 I                     | -7.1     | -7       | -6.9     | -6.9     | -6.8     | -6.5     | -6.5     | -6.4     | -6.2     |
|                  | 69 L                     | -6.9     | -6.9     | -6.9     | -6.8     | -6.7     | -6.5     | -6.5     | -6.5     | -6.5     |
|                  | 69 M                     | -7.1     | -6.9     | -6.8     | -6.7     | -6.6     | -6.6     | -6.5     | -6.5     | -6.5     |
|                  | 69 P                     | -6.8     | -6.6     | -6.6     | -6.4     | -6.4     | -6.2     | -6.1     | -6.1     | -6       |
|                  | 69 V                     | -6.7     | -6.7     | -6.5     | -6.5     | -6.5     | -6.4     | -6.3     | -6.3     | -6.2     |
|                  | 69 W                     | -6.9     | -6.9     | -6.8     | -6.8     | -6.7     | -6.7     | -6.5     | -6.3     | -6.3     |
|                  | 69 C                     | -7.2     | -6.9     | -6.9     | -6.9     | -6.9     | -6.8     | -6.8     | -6.5     | -6.4     |
|                  | 69 N                     | -7       | -6.9     | -6.8     | -6.8     | -6.6     | -6.5     | -6.5     | -6.5     | -6.4     |
|                  | 69 Q                     | -7.1     | -6.9     | -6.8     | -6.5     | -6.3     | -6.3     | -6.3     | -6.2     | -6.2     |
|                  | 69 S                     | -6.9     | -6.7     | -6.6     | -6.4     | -6.3     | -6.3     | -6.2     | -6.1     | -6.1     |
|                  | 69 T                     | -7.1     | -6.8     | -6.8     | -6.7     | -6.5     | -6.5     | -6.4     | -6.3     | -6.3     |
|                  | 69 Y                     | -6.4     | -6.3     | -6.1     | -6       | -5.9     | -5.8     | -5.6     | -5.6     | -5.4     |
|                  | 69 D                     | -6.7     | -6.7     | -6.6     | -6.5     | -6.5     | -6.4     | -6.1     | -6       | -6       |
|                  | 69 E                     | -7.2     | -7       | -7       | -7       | -6.8     | -6.8     | -6.8     | -6.7     | -6.7     |
|                  | 69 H                     | -7.1     | -7       | -6.6     | -6.6     | -6.5     | -6.5     | -6.5     | -6.4     | -6.4     |
| 69 K             | -7                       | -6.8     | -6.8     | -6.3     | -6.3     | -6.1     | -6.1     | -6.1     | -6.1     |          |
| 69 R             | -5.8                     | -5.7     | -5.6     | -5.5     | -5.5     | -5.3     | -5.3     | -5.3     | -5.3     |          |

**Table C2: Structure validations, Result from MolProbidity Serve**

| Epitope   | Protien with amino acid substitutions | MolProbdity Score | Clash Score | Ramachandon Plot |          | Poor Rotamers | C-Beta Deviations | Bad Bonds | Bad Angles           | Verify 3D %of the residues (averaged 3D-1D score) | ERRAT | ProSA-Web (Z-Score) |
|-----------|---------------------------------------|-------------------|-------------|------------------|----------|---------------|-------------------|-----------|----------------------|---------------------------------------------------|-------|---------------------|
|           |                                       |                   |             | Favored          | Outliers |               |                   |           |                      |                                                   |       |                     |
| Epitope A | 147 A                                 | 0.9               | 0.4         | 1.0              | 0.0      | 0.0           | 0.0               | 0.0       | 0.0                  | 88.9% ( $\geq 0.2$ )                              | 97.9  | -8.7                |
|           | 147 F                                 | 0.9               | 0.5         | 1.0              | 0.0      | 0.0           | 0.0               | 0.0       | 0.0                  | 88.9% ( $\geq 0.2$ )                              | 97.9  | -8.7                |
|           | 147 G                                 | 0.9               | 0.5         | 1.0              | 0.0      | 0.0           | 0.0               | 0.0       | 0.0                  | 88.9% ( $\geq 0.2$ )                              | 97.9  | -8.8                |
|           | 147 I                                 | 0.9               | 0.5         | 1.0              | 0.0      | 0.0           | 0.0               | 0.0       | 0.0                  | 88.9% ( $\geq 0.2$ )                              | 97.9  | -8.7                |
|           | 147 L                                 | 0.9               | 0.5         | 1.0              | 0.0      | 0.0           | 0.0               | 0.0       | 0.0                  | 88.9% ( $\geq 0.2$ )                              | 97.9  | -8.7                |
|           | 147 M                                 | 0.9               | 0.5         | 1.0              | 0.0      | 0.0           | 0.0               | 0.0       | 0.0                  | 88.9% ( $\geq 0.2$ )                              | 97.9  | -8.7                |
|           | 147 P                                 | 0.9               | 0.5         | 1.0              | 0.0      | 0.0           | 0.0               | 0.0       | 0.0                  | 88.9% ( $\geq 0.2$ )                              | 97.7  | -8.8                |
|           | 147 V                                 | 0.9               | 0.5         | 1.0              | 0.0      | 0.0           | 0.0               | 0.0       | 0.0                  | 88.9% ( $\geq 0.2$ )                              | 97.9  | -8.7                |
|           | 147 W                                 | 0.9               | 0.5         | 1.0              | 0.0      | 0.0           | 0.0               | 0.0       | 0.0                  | 88.9% ( $\geq 0.2$ )                              | 97.9  | -8.7                |
|           | 147 C                                 | 0.9               | 0.5         | 1.0              | 0.0      | 0.0           | 0.0               | 0.0       | 0.0                  | 88.9% ( $\geq 0.2$ )                              | 97.9  | -8.7                |
|           | 147 N                                 | 0.9               | 0.5         | 1.0              | 0.0      | 0.0           | 0.0               | 0.0       | 0.0                  | 88.9% ( $\geq 0.2$ )                              | 97.9  | -8.8                |
|           | 147 Q                                 | 0.9               | 0.5         | 1.0              | 0.0      | 0.0           | 0.0               | 0.0       | 0.0                  | 88.9% ( $\geq 0.2$ )                              | 97.9  | -8.8                |
|           | 147 S                                 | 0.9               | 0.5         | 1.0              | 0.0      | 0.0           | 0.0               | 0.0       | 0.0                  | 88.9% ( $\geq 0.2$ )                              | 97.9  | -8.8                |
|           | 147 T                                 | 0.9               | 0.5         | 1.0              | 0.0      | 0.0           | 0.0               | 0.0       | 0.0                  | 88.9% ( $\geq 0.2$ )                              | 97.9  | -8.7                |
|           | 147 Y                                 | 0.9               | 0.5         | 1.0              | 0.0      | 0.0           | 0.0               | 0.0       | 0.0                  | 88.9% ( $\geq 0.2$ )                              | 97.9  | -8.7                |
|           | 147 D                                 | 0.9               | 0.5         | 1.0              | 0.0      | 0.0           | 0.0               | 0.0       | 0.0                  | 88.9% ( $\geq 0.2$ )                              | 97.9  | -8.8                |
|           | 147 E                                 | 0.9               | 0.5         | 1.0              | 0.0      | 0.0           | 0.0               | 0.0       | 0.0                  | 88.9% ( $\geq 0.2$ )                              | 97.9  | -8.8                |
|           | 147 H                                 | 0.9               | 0.5         | 1.0              | 0.0      | 0.0           | 0.0               | 0.0       | 0.0                  | 88.9% ( $\geq 0.2$ )                              | 97.9  | -8.8                |
| 147 K     | 0.9                                   | 0.5               | 1.0         | 0.0              | 0.0      | 0.0           | 0.0               | 0.0       | 88.9% ( $\geq 0.2$ ) | 97.9                                              | -8.8  |                     |
| 147 R     | 0.9                                   | 0.5               | 1.0         | 0.0              | 0.0      | 0.0           | 0.0               | 0.0       | 88.9% ( $\geq 0.2$ ) | 97.9                                              | -8.8  |                     |
| Epitope B | 160 A                                 | 1.0               | 0.5         | 1.0              | 0.0      | 0.0           | 0.0               | 0.0       | 0.0                  | 90.2% ( $\geq 0.2$ )                              | 97.7  | -9.6                |
|           | 160 F                                 | 1.1               | 1.1         | 1.0              | 0.0      | 0.0           | 0.0               | 0.0       | 0.0                  | 89.6% ( $\geq 0.2$ )                              | 96.7  | -9.0                |
|           | 160 G                                 | 1.1               | 1.1         | 1.0              | 0.0      | 0.0           | 0.0               | 0.0       | 0.0                  | 89.6% ( $\geq 0.2$ )                              | 96.7  | -9.1                |
|           | 160 I                                 | 1.1               | 1.1         | 1.0              | 0.0      | 0.0           | 0.0               | 0.0       | 0.0                  | 89.6% ( $\geq 0.2$ )                              | 96.7  | -9.0                |
|           | 160 L                                 | 1.1               | 1.1         | 1.0              | 0.0      | 0.0           | 0.0               | 0.0       | 0.0                  | 89.6% ( $\geq 0.2$ )                              | 96.7  | -9.0                |
|           | 160 M                                 | 1.1               | 1.1         | 1.0              | 0.0      | 0.0           | 0.0               | 0.0       | 0.0                  | 89.6% ( $\geq 0.2$ )                              | 96.7  | -9.0                |
|           | 160 P                                 | 1.1               | 1.1         | 1.0              | 0.0      | 0.0           | 0.0               | 0.0       | 0.0                  | 90.0% ( $\geq 0.2$ )                              | 96.7  | -9.0                |
|           | 160 V                                 | 1.1               | 1.1         | 1.0              | 0.0      | 0.0           | 0.0               | 0.0       | 0.0                  | 89.6% ( $\geq 0.2$ )                              | 96.7  | -9.0                |
|           | 160 W                                 | 1.1               | 1.1         | 1.0              | 0.0      | 0.0           | 0.0               | 0.0       | 0.0                  | 89.6% ( $\geq 0.2$ )                              | 96.7  | -9.0                |
|           | 160 C                                 | 1.1               | 1.1         | 1.0              | 0.0      | 0.0           | 0.0               | 0.0       | 0.0                  | 89.6% ( $\geq 0.2$ )                              | 96.7  | -8.9                |
|           | 160 N                                 | 1.1               | 1.1         | 1.0              | 0.0      | 0.0           | 0.0               | 0.0       | 0.0                  | 89.6% ( $\geq 0.2$ )                              | 96.7  | -9.1                |
|           | 160 Q                                 | 1.1               | 1.1         | 1.0              | 0.0      | 0.0           | 0.0               | 0.0       | 0.0                  | 89.6% ( $\geq 0.2$ )                              | 96.7  | -9.1                |
|           | 160 S                                 | 1.0               | 0.5         | 1.0              | 0.0      | 0.0           | 0.0               | 0.0       | 0.0                  | 90.2% ( $\geq 0.2$ )                              | 97.7  | -9.0                |
|           | 160 T                                 | 1.1               | 1.1         | 1.0              | 0.0      | 0.0           | 0.0               | 0.0       | 0.0                  | 89.6% ( $\geq 0.2$ )                              | 96.7  | -9.0                |
|           | 160 Y                                 | 1.1               | 1.1         | 1.0              | 0.0      | 0.0           | 0.0               | 0.0       | 0.0                  | 89.6% ( $\geq 0.2$ )                              | 96.7  | -9.0                |
|           | 160 D                                 | 1.1               | 1.1         | 1.0              | 0.0      | 0.0           | 0.0               | 0.0       | 0.0                  | 89.6% ( $\geq 0.2$ )                              | 96.7  | -9.0                |
|           | 160 E                                 | 1.1               | 1.1         | 1.0              | 0.0      | 0.0           | 0.0               | 0.0       | 0.0                  | 89.6% ( $\geq 0.2$ )                              | 96.7  | -9.1                |
|           | 160 H                                 | 1.1               | 1.1         | 1.0              | 0.0      | 0.0           | 0.0               | 0.0       | 0.0                  | 89.6% ( $\geq 0.2$ )                              | 96.7  | -9.0                |
| 160 K     | 1.0                                   | 0.5               | 1.0         | 0.0              | 0.0      | 0.0           | 0.0               | 0.0       | 90.2% ( $\geq 0.2$ ) | 97.7                                              | -9.1  |                     |
| 160 R     | 1.0                                   | 0.5               | 1.0         | 0.0              | 0.0      | 0.0           | 0.0               | 0.0       | 90.2% ( $\geq 0.2$ ) | 97.7                                              | -9.0  |                     |

| Epitope   | Profien with amino acid substituions | MolProbity Score | Clash Score | Ramachandon Plot |          | Poor Rotamers | C-Beta Deviations | Bad Bonds | Bad Angles           | Verify 3D %of the residues (averaged 3D-1D score) | ERRAT | ProSA-Web (Z-Score) |
|-----------|--------------------------------------|------------------|-------------|------------------|----------|---------------|-------------------|-----------|----------------------|---------------------------------------------------|-------|---------------------|
|           |                                      |                  |             | Favored          | Outliers |               |                   |           |                      |                                                   |       |                     |
| Epitope D | 214 A                                | 0.9              | 0.5         | 1.0              | 0.0      | 0.0           | 0.0               | 0.0       | 0.0                  | 88.9% ( $\geq 0.2$ )                              | 98.5  | -8.8                |
|           | 214 F                                | 0.9              | 0.5         | 1.0              | 0.0      | 0.0           | 0.0               | 0.0       | 0.0                  | 87.7% ( $\geq 0.2$ )                              | 97.9  | -8.8                |
|           | 214 G                                | 0.9              | 0.5         | 1.0              | 0.0      | 0.0           | 0.0               | 0.0       | 0.0                  | 88.9% ( $\geq 0.2$ )                              | 97.9  | -8.8                |
|           | 214 I                                | 0.9              | 0.5         | 1.0              | 0.0      | 0.0           | 0.0               | 0.0       | 0.0                  | 87.7% ( $\geq 0.2$ )                              | 97.9  | -8.8                |
|           | 214 L                                | 0.9              | 0.5         | 1.0              | 0.0      | 0.0           | 0.0               | 0.0       | 0.0                  | 88.1% ( $\geq 0.2$ )                              | 97.9  | -8.8                |
|           | 214 M                                | 0.9              | 0.5         | 1.0              | 0.0      | 0.0           | 0.0               | 0.0       | 0.0                  | 88.1% ( $\geq 0.2$ )                              | 97.9  | -8.8                |
|           | 214 P                                | 0.9              | 0.5         | 1.0              | 0.0      | 0.0           | 0.0               | 0.0       | 0.0                  | 88.9% ( $\geq 0.2$ )                              | 97.9  | -8.8                |
|           | 214 V                                | 0.9              | 0.5         | 1.0              | 0.0      | 0.0           | 0.0               | 0.0       | 0.0                  | 88.5% ( $\geq 0.2$ )                              | 97.9  | -8.7                |
|           | 214 W                                | 0.9              | 0.5         | 1.0              | 0.0      | 0.0           | 0.0               | 0.0       | 0.0                  | 88.7% ( $\geq 0.2$ )                              | 97.9  | -8.8                |
|           | 214 C                                | 0.9              | 0.5         | 1.0              | 0.0      | 0.0           | 0.0               | 0.0       | 0.0                  | 88.9% ( $\geq 0.2$ )                              | 97.9  | -8.8                |
|           | 214 N                                | 0.9              | 0.5         | 1.0              | 0.0      | 0.0           | 0.0               | 0.0       | 0.0                  | 88.9% ( $\geq 0.2$ )                              | 97.9  | -8.8                |
|           | 214 Q                                | 0.9              | 0.5         | 1.0              | 0.0      | 0.0           | 0.0               | 0.0       | 0.0                  | 88.7% ( $\geq 0.2$ )                              | 97.7  | -8.8                |
|           | 214 S                                | 0.9              | 0.5         | 1.0              | 0.0      | 0.0           | 0.0               | 0.0       | 0.0                  | 88.9% ( $\geq 0.2$ )                              | 97.9  | -8.8                |
|           | 214 T                                | 0.9              | 0.5         | 1.0              | 0.0      | 0.0           | 0.0               | 0.0       | 0.0                  | 88.9% ( $\geq 0.2$ )                              | 97.9  | -8.8                |
|           | 214 Y                                | 0.9              | 0.5         | 1.0              | 0.0      | 0.0           | 0.0               | 0.0       | 0.0                  | 88.3% ( $\geq 0.2$ )                              | 97.9  | -8.8                |
|           | 214 D                                | 0.9              | 0.5         | 1.0              | 0.0      | 0.0           | 0.0               | 0.0       | 0.0                  | 88.9% ( $\geq 0.2$ )                              | 97.9  | -8.8                |
|           | 214 E                                | 0.9              | 0.5         | 1.0              | 0.0      | 0.0           | 0.0               | 0.0       | 0.0                  | 88.7% ( $\geq 0.2$ )                              | 97.9  | -8.8                |
|           | 214 H                                | 0.9              | 0.5         | 1.0              | 0.0      | 0.0           | 0.0               | 0.0       | 0.0                  | 88.9% ( $\geq 0.2$ )                              | 97.9  | -8.8                |
|           | 214 K                                | 0.9              | 0.5         | 1.0              | 0.0      | 0.0           | 0.0               | 0.0       | 0.0                  | 88.7% ( $\geq 0.2$ )                              | 97.9  | -8.8                |
| 214 R     | 0.9                                  | 0.5              | 1.0         | 0.0              | 0.0      | 0.0           | 0.0               | 0.0       | 88.7% ( $\geq 0.2$ ) | 97.9                                              | -8.8  |                     |
| Epitope E | 69 A                                 | 0.9              | 0.5         | 1.0              | 0.0      | 0.0           | 0.0               | 0.0       | 0.0                  | 88.5% ( $\geq 0.2$ )                              | 97.9  | -8.7                |
|           | 69 F                                 | 0.9              | 0.5         | 1.0              | 0.0      | 0.0           | 0.0               | 0.0       | 0.0                  | 88.5% ( $\geq 0.2$ )                              | 97.9  | -8.7                |
|           | 69 G                                 | 0.9              | 0.5         | 1.0              | 0.0      | 0.0           | 0.0               | 0.0       | 0.0                  | 88.5% ( $\geq 0.2$ )                              | 97.9  | -8.7                |
|           | 69 I                                 | 0.9              | 0.5         | 1.0              | 0.0      | 0.0           | 0.0               | 0.0       | 0.0                  | 89.3% ( $\geq 0.2$ )                              | 97.9  | -8.7                |
|           | 69 L                                 | 0.9              | 0.5         | 1.0              | 0.0      | 0.0           | 0.0               | 0.0       | 0.0                  | 88.5% ( $\geq 0.2$ )                              | 97.9  | -8.7                |
|           | 69 M                                 | 0.9              | 0.5         | 1.0              | 0.0      | 0.0           | 0.0               | 0.0       | 0.0                  | 88.5% ( $\geq 0.2$ )                              | 97.9  | -8.7                |
|           | 69 P                                 | 0.9              | 0.7         | 1.0              | 0.0      | 0.0           | 0.0               | 0.0       | 0.0                  | 89.3% ( $\geq 0.2$ )                              | 97.9  | -8.7                |
|           | 69 V                                 | 0.9              | 0.5         | 1.0              | 0.0      | 0.0           | 0.0               | 0.0       | 0.0                  | 89.3% ( $\geq 0.2$ )                              | 97.9  | -8.7                |
|           | 69 W                                 | 0.9              | 0.7         | 1.0              | 0.0      | 0.0           | 0.0               | 0.0       | 0.0                  | 88.9% ( $\geq 0.2$ )                              | 97.9  | -8.7                |
|           | 69 C                                 | 0.9              | 0.5         | 1.0              | 0.0      | 0.0           | 0.0               | 0.0       | 0.0                  | 88.9% ( $\geq 0.2$ )                              | 97.9  | -8.7                |
|           | 69 N                                 | 0.9              | 0.5         | 1.0              | 0.0      | 0.0           | 0.0               | 0.0       | 0.0                  | 88.5% ( $\geq 0.2$ )                              | 97.9  | -8.8                |
|           | 69 Q                                 | 0.9              | 0.5         | 1.0              | 0.0      | 0.0           | 0.0               | 0.0       | 0.0                  | 88.5% ( $\geq 0.2$ )                              | 97.9  | -8.8                |
|           | 69 S                                 | 0.9              | 0.5         | 1.0              | 0.0      | 0.0           | 0.0               | 0.0       | 0.0                  | 88.9% ( $\geq 0.2$ )                              | 97.9  | -8.8                |
|           | 69 T                                 | 0.9              | 0.5         | 1.0              | 0.0      | 0.0           | 0.0               | 0.0       | 0.0                  | 88.9% ( $\geq 0.2$ )                              | 97.9  | -8.8                |
|           | 69 Y                                 | 0.9              | 0.5         | 1.0              | 0.0      | 0.0           | 0.0               | 0.0       | 0.0                  | 88.5% ( $\geq 0.2$ )                              | 97.9  | -8.7                |
|           | 69 D                                 | 0.9              | 0.5         | 1.0              | 0.0      | 0.0           | 0.0               | 0.0       | 0.0                  | 88.9% ( $\geq 0.2$ )                              | 97.9  | -8.8                |
|           | 69 E                                 | 0.9              | 0.5         | 1.0              | 0.0      | 0.0           | 0.0               | 0.0       | 0.0                  | 88.9% ( $\geq 0.2$ )                              | 97.9  | -8.8                |
|           | 69 H                                 | 0.9              | 0.5         | 1.0              | 0.0      | 0.0           | 0.0               | 0.0       | 0.0                  | 88.9% ( $\geq 0.2$ )                              | 97.9  | -8.8                |
|           | 69 K                                 | 0.9              | 0.5         | 1.0              | 0.0      | 0.0           | 0.0               | 0.0       | 0.0                  | 88.7% ( $\geq 0.2$ )                              | 97.9  | -8.8                |
| 69 R      | 0.9                                  | 0.5              | 1.0         | 0.0              | 0.0      | 0.0           | 0.0               | 0.0       | 88.5% ( $\geq 0.2$ ) | 97.9                                              | -8.7  |                     |

## Appendix D: Accession numbers.

### Dataset 1: Accession numbers of global HA sequences (n= 596) used for Time-scaled phylogenies.

#### Selected from Bangladesh (n=55)

| Accession number | Date of Collection | Accession number | Date of Collection | Accession number | Date of Collection |
|------------------|--------------------|------------------|--------------------|------------------|--------------------|
| EPI_ISL_74079    | 2009-05-17         | EPI_ISL_151804   | 2013-05-12         | EPI_ISL_277154   | 2017-06-04         |
| EPI_ISL_74078    | 2009-04-16         | EPI_ISL_150284   | 2013-07-22         | EPI_ISL_277149   | 2017-07-01         |
| EPI_ISL_60775    | 2009-06-06         | EPI_ISL_150281   | 2013-07-13         | EPI_ISL_270162   | 2017-04-25         |
| EPI_ISL_60774    | 2009-05-08         | EPI_ISL_145040   | 2013-05-12         | EPI_ISL_332954   | 2018-08-13         |
| EPI_ISL_60773    | 2009-05-06         | EPI_ISL_168105   | 2014-06-09         | EPI_ISL_336711   | 2018-08-01         |
| EPI_ISL_84089    | 2010-08-19         | EPI_ISL_166789   | 2014-05-27         | EPI_ISL_334154   | 2018-08-27         |
| EPI_ISL_84088    | 2010-09-16         | EPI_ISL_223995   | 2015-10-05         | EPI_ISL_330939   | 2018-06-11         |
| EPI_ISL_84087    | 2010-09-16         | EPI_ISL_212959   | 2015-10-03         | EPI_ISL_330926   | 2018-07-11         |
| EPI_ISL_100423   | 2011-08-08         | EPI_ISL_211677   | 2015-09-10         | EPI_ISL_398391   | 2019-07-18         |
| EPI_ISL_99071    | 2011-05-19         | EPI_ISL_208596   | 2015-11-18         | EPI_ISL_398362   | 2019-08-05         |
| EPI_ISL_99070    | 2011-05-19         | EPI_ISL_201271   | 2015-08-29         | EPI_ISL_395398   | 2019-07-03         |
| EPI_ISL_99069    | 2011-05-19         | EPI_ISL_238626   | 2016-07-10         | EPI_ISL_391157   | 2019-06-22         |
| EPI_ISL_98636    | 2011-07-13         | EPI_ISL_233472   | 2016-06-21         | EPI_ISL_390067   | 2019-06-11         |
| EPI_ISL_260564   | 2012-08-21         | EPI_ISL_233452   | 2016-06-11         | EPI_ISL_717682   | 2020-10-01         |
| EPI_ISL_260563   | 2012-08-15         | EPI_ISL_233443   | 2016-07-02         | EPI_ISL_717681   | 2020-09-05         |
| EPI_ISL_260562   | 2012-07-24         | EPI_ISL_233440   | 2016-07-12         | EPI_ISL_717673   | 2020-10-07         |
| EPI_ISL_260561   | 2012-07-17         | EPI_ISL_285881   | 2017-07-01         | EPI_ISL_584003   | 2020-08-26         |
| EPI_ISL_132113   | 2012-09-25         | EPI_ISL_277159   | 2017-06-11         |                  |                    |
| EPI_ISL_157089   | 2013-11-24         | EPI_ISL_584002   | 2020-01-03         |                  |                    |

#### Selected from East Asia; EA (China/ Korea/ Japan), n= 60

| Accession number | Date of Collection | Accession number | Date of Collection | Accession number | Date of Collection |
|------------------|--------------------|------------------|--------------------|------------------|--------------------|
| EPI_ISL_70212    | 2009-11-25         | EPI_ISL_148669   | 2012-03-05         | EPI_ISL_178004   | 2015-01-08         |
| EPI_ISL_32238    | 2009-03-03         | EPI_ISL_137258   | 2012-12-25         | EPI_ISL_213994   | 2015-07-07         |
| EPI_ISL_32233    | 2009-03-12         | EPI_ISL_134799   | 2012-12-04         | EPI_ISL_190379   | 2015-04-02         |
| EPI_ISL_74090    | 2009-05-23         | EPI_ISL_132497   | 2012-09-10         | EPI_ISL_242504   | 2016-11-13         |
| EPI_ISL_32232    | 2009-01-06         | EPI_ISL_156391   | 2013-01-29         | EPI_ISL_225352   | 2016-03-03         |
| EPI_ISL_148655   | 2010-09-08         | EPI_ISL_148095   | 2013-06-06         | EPI_ISL_225316   | 2016-04-13         |
| EPI_ISL_83689    | 2010-09-06         | EPI_ISL_153911   | 2013-11-25         | EPI_ISL_223601   | 2016-01-06         |
| EPI_ISL_83687    | 2010-08-04         | EPI_ISL_153316   | 2013-09-25         | EPI_ISL_242821   | 2016-12-04         |
| EPI_ISL_83685    | 2010-07-07         | EPI_ISL_143706   | 2013-04-11         | EPI_ISL_328854   | 2017-06-19         |
| EPI_ISL_83684    | 2010-05-12         | EPI_ISL_176327   | 2014-12-12         | EPI_ISL_302548   | 2017-05-16         |
| EPI_ISL_278393   | 2011-12-01         | EPI_ISL_173112   | 2014-03-29         | EPI_ISL_267067   | 2017-04-15         |
| EPI_ISL_101485   | 2011-11-16         | EPI_ISL_176989   | 2014-01-24         | EPI_ISL_262088   | 2017-03-22         |
| EPI_ISL_101345   | 2011-11-18         | EPI_ISL_164688   | 2014-03-24         | EPI_ISL_258271   | 2017-03-07         |
| EPI_ISL_94610    | 2011-02-14         | EPI_ISL_158175   | 2014-01-29         | EPI_ISL_313914   | 2018-01-25         |
| EPI_ISL_121883   | 2011-12-24         | EPI_ISL_190369   | 2015-01-19         | EPI_ISL_314314   | 2018-02-01         |
| EPI_ISL_328898   | 2012-08-06         | EPI_ISL_207678   | 2015-12-06         | EPI_ISL_334513   | 2018-12-11         |



| Accession number | Date of Collection | Accession number | Date of Collection | Accession number | Date of Collection |
|------------------|--------------------|------------------|--------------------|------------------|--------------------|
| EPI_ISL_334509   | 2018-11-20         | EPI_ISL_367025   | 2019-04-29         | EPI_ISL_684054   | 2020-02-14         |
| EPI_ISL_334503   | 2018-11-06         | EPI_ISL_405836   | 2019-01-17         | EPI_ISL_528884   | 2020-01-08         |
| EPI_ISL_367449   | 2019-04-24         | EPI_ISL_710500   | 2019-11-24         | EPI_ISL_485913   | 2020-01-08         |
| EPI_ISL_367364   | 2019-05-22         | EPI_ISL_480451   | 2020-01-05         | EPI_ISL_485466   | 2020-02-17         |

**Selected from European Union; EU (Germany/ Greece/ Spain/ Sweden), n= 60**

| Accession number | Date of Collection | Accession number | Date of Collection | Accession number | Date of Collection |
|------------------|--------------------|------------------|--------------------|------------------|--------------------|
| EPI_ISL_61774    | 2009-01-15         | EPI_ISL_141805   | 2013-02-13         | EPI_ISL_292040   | 2017-12-13         |
| EPI_ISL_70808    | 2009-01-14         | EPI_ISL_152952   | 2013-12-04         | EPI_ISL_285986   | 2017-11-18         |
| EPI_ISL_70807    | 2009-01-02         | EPI_ISL_138313   | 2013-02-05         | EPI_ISL_273196   | 2017-01-25         |
| EPI_ISL_70683    | 2009-01-22         | EPI_ISL_141081   | 2013-02-05         | EPI_ISL_262263   | 2017-01-16         |
| EPI_ISL_70662    | 2009-02-11         | EPI_ISL_153705   | 2013-12-07         | EPI_ISL_274117   | 2017-01-21         |
| EPI_ISL_86163    | 2010-12-22         | EPI_ISL_169134   | 2014-11-03         | EPI_ISL_310252   | 2018-03-14         |
| EPI_ISL_86049    | 2010-12-17         | EPI_ISL_167959   | 2014-10-19         | EPI_ISL_303911   | 2018-01-24         |
| EPI_ISL_85730    | 2010-10-22         | EPI_ISL_167958   | 2014-10-25         | EPI_ISL_315989   | 2018-03-07         |
| EPI_ISL_82220    | 2010-10-01         | EPI_ISL_170317   | 2014-12-24         | EPI_ISL_314925   | 2018-04-02         |
| EPI_ISL_81390    | 2010-04-29         | EPI_ISL_155888   | 2014-01-13         | EPI_ISL_304561   | 2018-01-08         |
| EPI_ISL_100469   | 2011-11-27         | EPI_ISL_215753   | 2015-12-22         | EPI_ISL_355217   | 2019-01-24         |
| EPI_ISL_100465   | 2011-11-19         | EPI_ISL_177077   | 2015-03-05         | EPI_ISL_347802   | 2019-02-26         |
| EPI_ISL_97047    | 2011-09-05         | EPI_ISL_181575   | 2015-02-02         | EPI_ISL_343372   | 2019-01-29         |
| EPI_ISL_107887   | 2011-12-02         | EPI_ISL_190907   | 2015-02-09         | EPI_ISL_345255   | 2019-01-17         |
| EPI_ISL_103271   | 2011-09-05         | EPI_ISL_213095   | 2015-10-30         | EPI_ISL_391081   | 2019-08-18         |
| EPI_ISL_219848   | 2012-01-28         | EPI_ISL_253958   | 2016-12-28         | EPI_ISL_410967   | 2020-01-21         |
| EPI_ISL_102138   | 2012-01-20         | EPI_ISL_245008   | 2016-12-17         | EPI_ISL_434428   | 2020-02-14         |
| EPI_ISL_132904   | 2012-10-30         | EPI_ISL_242989   | 2016-12-16         | EPI_ISL_405715   | 2020-01-14         |
| EPI_ISL_107884   | 2012-01-12         | EPI_ISL_244208   | 2016-11-16         | EPI_ISL_529044   | 2020-02-24         |
| EPI_ISL_219846   | 2012-01-02         | EPI_ISL_248874   | 2016-12-17         | EPI_ISL_485777   | 2020-02-04         |

**Selected from Central Asia; CA (India/ Kazakhstan/ Uzbekistan), n= 56**

| Accession number | Date of Collection | Accession number | Date of Collection | Accession number | Date of Collection |
|------------------|--------------------|------------------|--------------------|------------------|--------------------|
| EPI_ISL_165167   | 2009-08-13         | EPI_ISL_105769   | 2011-11-14         | EPI_ISL_156805   | 2013-01-27         |
| EPI_ISL_165166   | 2009-08-14         | EPI_ISL_96096    | 2011-06-20         | EPI_ISL_175231   | 2014-12-29         |
| EPI_ISL_165161   | 2009-09-13         | EPI_ISL_96094    | 2011-06-29         | EPI_ISL_165640   | 2014-03-04         |
| EPI_ISL_165159   | 2009-08-09         | EPI_ISL_161481   | 2012-12-07         | EPI_ISL_179354   | 2014-11-25         |
| EPI_ISL_69326    | 2009-08-18         | EPI_ISL_161478   | 2012-10-26         | EPI_ISL_164818   | 2014-06-05         |
| EPI_ISL_165156   | 2010-08-10         | EPI_ISL_107871   | 2012-01-01         | EPI_ISL_164429   | 2014-01-11         |
| EPI_ISL_165155   | 2010-08-10         | EPI_ISL_134827   | 2012-02-02         | EPI_ISL_206129   | 2015-11-03         |
| EPI_ISL_165154   | 2010-09-02         | EPI_ISL_125911   | 2012-01-30         | EPI_ISL_191967   | 2015-02-23         |
| EPI_ISL_89776    | 2010-10-25         | EPI_ISL_161499   | 2013-02-20         | EPI_ISL_189849   | 2015-01-21         |
| EPI_ISL_84059    | 2010-09-06         | EPI_ISL_154756   | 2013-12-23         | EPI_ISL_175248   | 2015-01-05         |
| EPI_ISL_235205   | 2011-09-12         | EPI_ISL_154753   | 2013-12-18         | EPI_ISL_175232   | 2015-01-02         |
| EPI_ISL_99884    | 2011-02-24         | EPI_ISL_138455   | 2013-01-17         | EPI_ISL_262207   | 2016-11-21         |

| Accession number | Date of Collection | Accession number | Date of Collection | Accession number | Date of Collection |
|------------------|--------------------|------------------|--------------------|------------------|--------------------|
| EPI_ISL_262202   | 2016-11-21         | EPI_ISL_296437   | 2017-09-08         | EPI_ISL_412107   | 2019-11-30         |
| EPI_ISL_248439   | 2016-12-12         | EPI_ISL_296425   | 2017-09-15         | EPI_ISL_409987   | 2019-12-22         |
| EPI_ISL_226089   | 2016-02-22         | EPI_ISL_306257   | 2018-01-31         | EPI_ISL_367815   | 2019-03-05         |
| EPI_ISL_234046   | 2016-02-09         | EPI_ISL_305846   | 2018-01-10         | EPI_ISL_367803   | 2019-02-13         |
| EPI_ISL_281726   | 2017-02-14         | EPI_ISL_303798   | 2018-02-08         | EPI_ISL_404740   | 2019-08-16         |
| EPI_ISL_281725   | 2017-02-14         | EPI_ISL_303796   | 2018-01-16         | EPI_ISL_534009   | 2020-02-05         |
| EPI_ISL_270205   | 2017-01-28         | EPI_ISL_331515   | 2018-03-29         |                  |                    |

**Selected from North America; NA (Canada/ USA) 10 strain/year, n= 120**

| Accession number | Date of Collection | Accession number | Date of Collection | Accession number | Date of Collection |
|------------------|--------------------|------------------|--------------------|------------------|--------------------|
| EPI_ISL_77961    | 2009-02-01         | EPI_ISL_160398   | 2012-12-31         | EPI_ISL_251247   | 2015-01-06         |
| EPI_ISL_77769    | 2009-04-30         | EPI_ISL_132807   | 2012-10-05         | EPI_ISL_203451   | 2015-07-01         |
| EPI_ISL_62497    | 2009-04-28         | EPI_ISL_129427   | 2012-08-06         | EPI_ISL_206243   | 2015-12-13         |
| EPI_ISL_62495    | 2009-04-30         | EPI_ISL_129410   | 2012-08-02         | EPI_ISL_211709   | 2015-12-04         |
| EPI_ISL_62487    | 2009-04-28         | EPI_ISL_109749   | 2012-02-02         | EPI_ISL_234053   | 2016-08-22         |
| EPI_ISL_136579   | 2009-06-07         | EPI_ISL_370275   | 2012-12-18         | EPI_ISL_220299   | 2016-02-24         |
| EPI_ISL_98965    | 2009-06-07         | EPI_ISL_369592   | 2012-12-27         | EPI_ISL_224026   | 2016-02-17         |
| EPI_ISL_32308    | 2009-02-05         | EPI_ISL_202132   | 2013-01-28         | EPI_ISL_219270   | 2016-03-04         |
| EPI_ISL_60740    | 2009-05-11         | EPI_ISL_189636   | 2013-01-20         | EPI_ISL_219198   | 2016-02-12         |
| EPI_ISL_32297    | 2009-01-26         | EPI_ISL_369602   | 2013-02-14         | EPI_ISL_289306   | 2016-12-01         |
| EPI_ISL_145077   | 2010-11-26         | EPI_ISL_160328   | 2013-02-02         | EPI_ISL_240189   | 2016-11-25         |
| EPI_ISL_84033    | 2010-09-03         | EPI_ISL_160280   | 2013-01-10         | EPI_ISL_239211   | 2016-09-26         |
| EPI_ISL_85591    | 2010-11-16         | EPI_ISL_149674   | 2013-01-30         | EPI_ISL_239224   | 2016-10-30         |
| EPI_ISL_84037    | 2010-08-24         | EPI_ISL_140990   | 2013-03-13         | EPI_ISL_239705   | 2016-11-18         |
| EPI_ISL_86092    | 2010-10-23         | EPI_ISL_164406   | 2013-12-29         | EPI_ISL_261805   | 2017-03-09         |
| EPI_ISL_79663    | 2010-08-06         | EPI_ISL_145125   | 2013-07-04         | EPI_ISL_249084   | 2017-01-13         |
| EPI_ISL_86107    | 2010-12-28         | EPI_ISL_138721   | 2013-02-20         | EPI_ISL_287522   | 2017-03-04         |
| EPI_ISL_87935    | 2010-11-30         | EPI_ISL_172607   | 2014-10-18         | EPI_ISL_287241   | 2017-03-16         |
| EPI_ISL_85587    | 2010-12-04         | EPI_ISL_157767   | 2014-01-29         | EPI_ISL_286710   | 2017-02-19         |
| EPI_ISL_84068    | 2010-10-14         | EPI_ISL_170022   | 2014-11-24         | EPI_ISL_286656   | 2017-02-07         |
| EPI_ISL_158625   | 2011-01-24         | EPI_ISL_159519   | 2014-03-06         | EPI_ISL_286599   | 2017-02-12         |
| EPI_ISL_119389   | 2011-02-14         | EPI_ISL_170698   | 2014-12-05         | EPI_ISL_286574   | 2017-02-07         |
| EPI_ISL_135251   | 2011-02-10         | EPI_ISL_251071   | 2014-12-23         | EPI_ISL_358238   | 2017-12-19         |
| EPI_ISL_89792    | 2011-02-19         | EPI_ISL_250954   | 2014-12-01         | EPI_ISL_294274   | 2017-09-25         |
| EPI_ISL_90862    | 2011-03-02         | EPI_ISL_251039   | 2014-12-10         | EPI_ISL_316759   | 2018-01-25         |
| EPI_ISL_89840    | 2011-02-08         | EPI_ISL_250345   | 2014-11-20         | EPI_ISL_300772   | 2018-02-02         |
| EPI_ISL_102456   | 2011-11-29         | EPI_ISL_250259   | 2014-10-14         | EPI_ISL_327318   | 2018-01-08         |
| EPI_ISL_98641    | 2011-03-02         | EPI_ISL_176709   | 2015-01-17         | EPI_ISL_336759   | 2018-10-26         |
| EPI_ISL_102990   | 2011-10-06         | EPI_ISL_175177   | 2015-02-03         | EPI_ISL_320720   | 2018-07-16         |
| EPI_ISL_90823    | 2011-03-29         | EPI_ISL_174181   | 2015-01-11         | EPI_ISL_361518   | 2018-03-01         |
| EPI_ISL_147967   | 2012-12-24         | EPI_ISL_200750   | 2015-09-13         | EPI_ISL_376832   | 2018-02-14         |
| EPI_ISL_147961   | 2012-12-04         | EPI_ISL_179010   | 2015-03-22         | EPI_ISL_376645   | 2018-01-31         |
| EPI_ISL_147945   | 2012-11-12         | EPI_ISL_178981   | 2015-03-03         | EPI_ISL_376580   | 2018-02-06         |

| Accession number | Date of Collection | Accession number | Date of Collection | Accession number | Date of Collection |
|------------------|--------------------|------------------|--------------------|------------------|--------------------|
| EPI_ISL_373474   | 2018-02-15         | EPI_ISL_380670   | 2019-03-27         | EPI_ISL_421092   | 2020-02-13         |
| EPI_ISL_344623   | 2019-01-03         | EPI_ISL_380515   | 2019-03-24         | EPI_ISL_413744   | 2020-02-05         |
| EPI_ISL_359027   | 2019-01-18         | EPI_ISL_502040   | 2019-05-05         | EPI_ISL_435328   | 2020-03-15         |
| EPI_ISL_359015   | 2019-02-01         | EPI_ISL_409391   | 2019-12-26         | EPI_ISL_416806   | 2020-02-19         |
| EPI_ISL_359435   | 2019-03-13         | EPI_ISL_427949   | 2020-02-01         | EPI_ISL_424739   | 2020-03-07         |
| EPI_ISL_360100   | 2019-03-06         | EPI_ISL_449731   | 2020-03-20         | EPI_ISL_415774   | 2020-01-19         |
| EPI_ISL_369008   | 2019-04-03         | EPI_ISL_424732   | 2020-02-04         | EPI_ISL_416768   | 2020-02-09         |

### Selected from Oceania; OS (Australia/ New Zealand), n= 60

| Accession number | Date of Collection | Accession number | Date of Collection | Accession number | Date of Collection |
|------------------|--------------------|------------------|--------------------|------------------|--------------------|
| EPI_ISL_60760    | 2009-01-01         | EPI_ISL_288242   | 2013-10-24         | EPI_ISL_275253   | 2017-07-06         |
| EPI_ISL_172958   | 2009-02-07         | EPI_ISL_172979   | 2013-02-01         | EPI_ISL_291364   | 2017-09-07         |
| EPI_ISL_76618    | 2009-07-05         | EPI_ISL_145684   | 2013-06-17         | EPI_ISL_277541   | 2017-07-24         |
| EPI_ISL_76619    | 2009-11-04         | EPI_ISL_161901   | 2013-11-21         | EPI_ISL_396648   | 2017-08-16         |
| EPI_ISL_60149    | 2009-05-07         | EPI_ISL_145321   | 2013-04-30         | EPI_ISL_396534   | 2017-08-14         |
| EPI_ISL_79465    | 2010-07-12         | EPI_ISL_288215   | 2014-02-09         | EPI_ISL_396652   | 2018-02-26         |
| EPI_ISL_83869    | 2010-10-15         | EPI_ISL_288186   | 2014-08-11         | EPI_ISL_329732   | 2018-07-26         |
| EPI_ISL_86123    | 2010-12-07         | EPI_ISL_166746   | 2014-06-14         | EPI_ISL_320378   | 2018-03-23         |
| EPI_ISL_83861    | 2010-10-01         | EPI_ISL_165591   | 2014-03-16         | EPI_ISL_330022   | 2018-03-17         |
| EPI_ISL_83226    | 2010-09-09         | EPI_ISL_168916   | 2014-07-09         | EPI_ISL_396473   | 2018-10-05         |
| EPI_ISL_94867    | 2011-04-12         | EPI_ISL_287937   | 2015-08-17         | EPI_ISL_356625   | 2019-03-29         |
| EPI_ISL_118579   | 2011-12-04         | EPI_ISL_287891   | 2015-08-17         | EPI_ISL_404956   | 2019-05-16         |
| EPI_ISL_99734    | 2011-08-08         | EPI_ISL_287834   | 2015-10-08         | EPI_ISL_365267   | 2019-06-05         |
| EPI_ISL_11860    | 2011-12-16         | EPI_ISL_200719   | 2015-04-22         | EPI_ISL_389274   | 2019-07-04         |
| EPI_ISL_95093    | 2011-04-07         | EPI_ISL_197525   | 2015-06-04         | EPI_ISL_356644   | 2019-03-14         |
| EPI_ISL_288360   | 2012-08-13         | EPI_ISL_289123   | 2016-05-31         | EPI_ISL_517769   | 2020-01-29         |
| EPI_ISL_128704   | 2012-07-02         | EPI_ISL_288832   | 2016-10-29         | EPI_ISL_528758   | 2020-03-16         |
| EPI_ISL_192789   | 2012-07-27         | EPI_ISL_227630   | 2016-02-22         | EPI_ISL_419608   | 2020-01-20         |
| EPI_ISL_192785   | 2012-07-23         | EPI_ISL_246675   | 2016-12-31         | EPI_ISL_410359   | 2020-01-07         |
| EPI_ISL_128650   | 2012-07-05         | EPI_ISL_244051   | 2016-09-04         | EPI_ISL_545575   | 2020-01-15         |

### Selected from South-East Asia; SEA (Indonesia/ Malaysia/ Philippines/ Singapore/ Thailand/ Vietnam), n= 60

| Accession number | Date of Collection | Accession number | Date of Collection | Accession number | Date of Collection |
|------------------|--------------------|------------------|--------------------|------------------|--------------------|
| EPI_ISL_143044   | 2009-05-22         | EPI_ISL_89836    | 2010-02-08         | EPI_ISL_208793   | 2012-07-30         |
| EPI_ISL_143015   | 2009-06-26         | EPI_ISL_235271   | 2011-11-29         | EPI_ISL_208780   | 2012-12-07         |
| EPI_ISL_208774   | 2009-10-29         | EPI_ISL_205407   | 2011-08-24         | EPI_ISL_205364   | 2013-01-28         |
| EPI_ISL_145179   | 2009-06-16         | EPI_ISL_123004   | 2011-12-05         | EPI_ISL_399250   | 2013-12-09         |
| EPI_ISL_70197    | 2009-05-05         | EPI_ISL_123001   | 2011-11-10         | EPI_ISL_205439   | 2013-12-11         |
| EPI_ISL_143053   | 2010-08-14         | EPI_ISL_122962   | 2011-12-09         | EPI_ISL_157088   | 2013-09-12         |
| EPI_ISL_143052   | 2010-05-22         | EPI_ISL_399276   | 2012-12-01         | EPI_ISL_165922   | 2013-12-06         |
| EPI_ISL_145207   | 2010-04-08         | EPI_ISL_399256   | 2012-07-30         | EPI_ISL_205457   | 2014-11-18         |
| EPI_ISL_145203   | 2010-06-17         | EPI_ISL_235211   | 2012-02-14         | EPI_ISL_205450   | 2014-08-05         |

| Accession number | Date of Collection | Accession number | Date of Collection | Accession number | Date of Collection |
|------------------|--------------------|------------------|--------------------|------------------|--------------------|
| EPI_ISL_192831   | 2014-05-30         | EPI_ISL_239131   | 2016-07-21         | EPI_ISL_333863   | 2018-02-01         |
| EPI_ISL_172604   | 2014-12-15         | EPI_ISL_249244   | 2016-11-01         | EPI_ISL_400299   | 2019-10-07         |
| EPI_ISL_167845   | 2014-01-13         | EPI_ISL_283062   | 2017-06-06         | EPI_ISL_400298   | 2019-08-19         |
| EPI_ISL_252447   | 2015-07-29         | EPI_ISL_283009   | 2017-09-25         | EPI_ISL_391670   | 2019-04-03         |
| EPI_ISL_213025   | 2015-10-16         | EPI_ISL_255583   | 2017-02-06         | EPI_ISL_391596   | 2019-01-10         |
| EPI_ISL_212372   | 2015-10-20         | EPI_ISL_255569   | 2017-02-03         | EPI_ISL_409058   | 2019-10-16         |
| EPI_ISL_215710   | 2015-03-31         | EPI_ISL_291290   | 2017-09-18         | EPI_ISL_481340   | 2020-01-02         |
| EPI_ISL_215701   | 2015-02-16         | EPI_ISL_344190   | 2018-12-07         | EPI_ISL_481336   | 2020-01-21         |
| EPI_ISL_240800   | 2016-12-05         | EPI_ISL_322075   | 2018-01-03         | EPI_ISL_514710   | 2020-01-02         |
| EPI_ISL_240772   | 2016-10-04         | EPI_ISL_349924   | 2018-05-27         | EPI_ISL_510012   | 2020-02-07         |
| EPI_ISL_239326   | 2016-08-11         | EPI_ISL_341163   | 2018-05-27         | EPI_ISL_644650   | 2020-01-13         |

**Selected from Southern Hemisphere; SH (Namibia/ Madagascar/ South Africa/ Argentina/ Brazil/ Chili/ Peru), n= 60**

| Accession number | Date of Collection | Accession number | Date of Collection | Accession number | Date of Collection |
|------------------|--------------------|------------------|--------------------|------------------|--------------------|
| EPI_ISL_34979    | 2009-01-01         | EPI_ISL_145642   | 2013-06-03         | EPI_ISL_274175   | 2017-02-21         |
| EPI_ISL_60769    | 2009-05-05         | EPI_ISL_148739   | 2013-08-02         | EPI_ISL_275807   | 2017-01-22         |
| EPI_ISL_60763    | 2009-06-26         | EPI_ISL_145113   | 2013-06-06         | EPI_ISL_278118   | 2017-07-13         |
| EPI_ISL_65119    | 2009-07-09         | EPI_ISL_145527   | 2013-02-25         | EPI_ISL_281742   | 2017-07-20         |
| EPI_ISL_60916    | 2009-06-08         | EPI_ISL_145487   | 2013-03-11         | EPI_ISL_279223   | 2017-06-06         |
| EPI_ISL_152833   | 2010-11-15         | EPI_ISL_263170   | 2014-07-11         | EPI_ISL_355840   | 2018-08-28         |
| EPI_ISL_152840   | 2010-11-20         | EPI_ISL_166794   | 2014-01-20         | EPI_ISL_346980   | 2018-06-27         |
| EPI_ISL_152282   | 2010-10-13         | EPI_ISL_168112   | 2014-02-19         | EPI_ISL_322156   | 2018-05-22         |
| EPI_ISL_152146   | 2010-10-30         | EPI_ISL_166719   | 2014-06-03         | EPI_ISL_322963   | 2018-04-09         |
| EPI_ISL_87951    | 2010-11-30         | EPI_ISL_166716   | 2014-07-01         | EPI_ISL_329855   | 2018-06-28         |
| EPI_ISL_152593   | 2011-10-07         | EPI_ISL_263242   | 2015-05-29         | EPI_ISL_367546   | 2019-01-30         |
| EPI_ISL_152260   | 2011-11-15         | EPI_ISL_201225   | 2015-05-18         | EPI_ISL_393597   | 2019-05-03         |
| EPI_ISL_263182   | 2011-07-14         | EPI_ISL_205201   | 2015-07-22         | EPI_ISL_393591   | 2019-04-23         |
| EPI_ISL_263144   | 2011-04-06         | EPI_ISL_205194   | 2015-06-15         | EPI_ISL_584010   | 2019-12-16         |
| EPI_ISL_235307   | 2011-10-07         | EPI_ISL_205192   | 2015-06-15         | EPI_ISL_388768   | 2019-06-10         |
| EPI_ISL_152589   | 2012-04-09         | EPI_ISL_244823   | 2016-09-11         | EPI_ISL_516175   | 2020-02-25         |
| EPI_ISL_152584   | 2012-02-08         | EPI_ISL_230308   | 2016-04-27         | EPI_ISL_516144   | 2020-01-30         |
| EPI_ISL_152497   | 2012-03-07         | EPI_ISL_274149   | 2016-12-23         | EPI_ISL_516189   | 2020-02-20         |
| EPI_ISL_125910   | 2012-04-11         | EPI_ISL_232562   | 2016-06-14         | EPI_ISL_516098   | 2020-03-05         |
| EPI_ISL_128065   | 2012-06-04         | EPI_ISL_231815   | 2016-06-02         | EPI_ISL_584007   | 2020-03-02         |

**Selected from United Kingdom; UK, n= 57**

| Accession number | Date of Collection | Accession number | Date of Collection | Accession number | Date of Collection |
|------------------|--------------------|------------------|--------------------|------------------|--------------------|
| EPI_ISL_60046    | 2009-07-01         | EPI_ISL_85727    | 2010-11-26         | EPI_ISL_99872    | 2011-09-11         |
| EPI_ISL_60047    | 2009-07-01         | EPI_ISL_85726    | 2010-09-27         | EPI_ISL_105765   | 2011-11-07         |
| EPI_ISL_60048    | 2009-07-01         | EPI_ISL_99876    | 2011-11-07         | EPI_ISL_132005   | 2012-04-18         |
| EPI_ISL_90600    | 2010-12-13         | EPI_ISL_99875    | 2011-10-10         | EPI_ISL_121909   | 2012-03-19         |
| EPI_ISL_88034    | 2010-12-06         | EPI_ISL_99874    | 2011-10-12         | EPI_ISL_121928   | 2012-04-03         |

| <b>Accession number</b> | <b>Date of Collection</b> | <b>Accession number</b> | <b>Date of Collection</b> | <b>Accession number</b> | <b>Date of Collection</b> |
|-------------------------|---------------------------|-------------------------|---------------------------|-------------------------|---------------------------|
| EPI_ISL_121927          | 2012-04-03                | EPI_ISL_287017          | 2015-01-21                | EPI_ISL_312054          | 2018-03-01                |
| EPI_ISL_117470          | 2012-03-30                | EPI_ISL_286942          | 2015-01-04                | EPI_ISL_303486          | 2018-01-25                |
| EPI_ISL_154749          | 2013-12-18                | EPI_ISL_285510          | 2015-01-14                | EPI_ISL_303415          | 2018-02-06                |
| EPI_ISL_153157          | 2013-10-16                | EPI_ISL_270463          | 2016-12-30                | EPI_ISL_327399          | 2018-04-06                |
| EPI_ISL_141675          | 2013-02-15                | EPI_ISL_269791          | 2016-12-06                | EPI_ISL_405114          | 2019-11-04                |
| EPI_ISL_141672          | 2013-01-30                | EPI_ISL_248521          | 2016-12-23                | EPI_ISL_399842          | 2019-10-24                |
| EPI_ISL_141669          | 2013-01-09                | EPI_ISL_274388          | 2016-09-06                | EPI_ISL_400525          | 2019-12-06                |
| EPI_ISL_192200          | 2014-12-10                | EPI_ISL_273942          | 2016-12-28                | EPI_ISL_404293          | 2019-12-03                |
| EPI_ISL_192195          | 2014-11-20                | EPI_ISL_292269          | 2017-12-16                | EPI_ISL_487025          | 2019-12-24                |
| EPI_ISL_188792          | 2014-12-15                | EPI_ISL_286917          | 2017-09-30                | EPI_ISL_480515          | 2020-01-09                |
| EPI_ISL_188768          | 2014-11-28                | EPI_ISL_270528          | 2017-02-01                | EPI_ISL_480494          | 2020-01-06                |
| EPI_ISL_286310          | 2014-12-12                | EPI_ISL_270419          | 2017-02-18                | EPI_ISL_471039          | 2020-01-04                |
| EPI_ISL_192262          | 2015-04-01                | EPI_ISL_274883          | 2017-01-02                | EPI_ISL_463769          | 2020-02-21                |
| EPI_ISL_186613          | 2015-02-11                | EPI_ISL_314162          | 2018-02-09                | EPI_ISL_414060          | 2020-01-06                |

## Dataset 2: Selected potential vaccine candidate (p-vac) from each season.

| Season<br>(WHO recommended<br>Vaccine)      | P-Vac Strain Name         | Accession<br>number | Country    | Date of<br>Collection |
|---------------------------------------------|---------------------------|---------------------|------------|-----------------------|
| 2015-16<br>(A/Switzerland/9715293/2013)     | A/Bangladesh/3400         | EPI_ISL_195894      | Bangladesh | 2015-05-25            |
|                                             | A/India/0609              | EPI_ISL_212992      | India      | 2015-02-21            |
|                                             | A/Nakhonratchaisima/35    | EPI_ISL_197500      | Thailand   | 2015-05-16            |
|                                             | A/Singapore/EN283         | EPI_ISL_215830      | Singapore  | 2015-04-30            |
|                                             | A/South Australia/1001    | EPI_ISL_288038      | Australia  | 2015-05-15            |
|                                             | A/Victoria/7              | EPI_ISL_288040      |            |                       |
| 2016-17<br>(Hong_Kong/4801/2014)            | A/Bangladesh/455          | EPI_ISL_233460      | Bangladesh | 2016-06-02            |
|                                             | A/India/1460              | EPI_ISL_234046      | India      | 2016-02-09            |
|                                             | A/Bangkok/175             | EPI_ISL_232109      | Thailand   | 2016-04-26            |
|                                             | A/Singapore/INFKK-16-0542 | EPI_ISL_225830      | Singapore  | 2016-05-16            |
|                                             | A/Victoria/504            | EPI_ISL_233842      | Australia  | 2016-05-15            |
| 2017-18<br>(Hong_Kong/4801/2014)            | A/Bangladesh/8007         | EPI_ISL_277271      | Bangladesh | 2017-05-16            |
|                                             | Bangladesh/5012           | EPI_ISL_277272      |            |                       |
|                                             | A/Trivandrum/MCVRAG1073   | EPI_ISL_329338      | India      | 2017-05-16            |
|                                             | A/Thailand/CU-B21873      | EPI_ISL_290143      | Thailand   | 2017-05-15            |
|                                             | A/Singapore/TT0555        | EPI_ISL_269771      | Singapore  | 2017-05-12            |
|                                             | A/Sydney/119              | EPI_ISL_271318      | Australia  | 2017-05-15            |
|                                             | A/Brisbane/61             | EPI_ISL_271281      |            |                       |
|                                             | A/South Australia/110     | EPI_ISL_271265      |            |                       |
| A/Brisbane/74                               | EPI_ISL_396283            |                     |            |                       |
| 2018-19 (Singapore/INFIMH-<br>16-0019/2016) | A/Bangladesh/455          | EPI_ISL_233460      | Bangladesh | 2016-06-02            |
|                                             | A/India/1460              | EPI_ISL_234046      | India      | 2016-02-09            |
|                                             | A/Bangkok/175             | EPI_ISL_232109      | Thailand   | 2016-04-26            |
|                                             | A/Singapore/INFKK-16-0542 | EPI_ISL_225830      | Singapore  | 2016-05-16            |
|                                             | A/Victoria/504            | EPI_ISL_233842      | Australia  | 2016-05-15            |
| 2019-20 (A/Kansas/14/2017)                  | A/Bangladesh/3025         | EPI_ISL_368171      | Bangladesh | 2019-05-15            |
|                                             | A/India/0534              | EPI_ISL_391120      | India      | 2019-04-10            |
|                                             | A/Lopburi/235             | EPI_ISL_390099      | Thailand   | 2019-05-15            |
|                                             | A/Singapore/OHC0015       | EPI_ISL_392640      | Singapore  | 2019-05-14            |
|                                             | A/Sydney/1027             | EPI_ISL_391462      | Australia  | 2019-05-15            |
|                                             | A/Perth/1020              | EPI_ISL_405892      |            |                       |
|                                             | A/Victoria/1008           | EPI_ISL_391453      |            |                       |
| A/Sydney/811                                | EPI_ISL_405908            |                     |            |                       |
| A/Victoria/30                               | EPI_ISL_391400            |                     |            |                       |

### Dataset 3: Sequences from 2015-16 to 2019-20 seasons

#### Selected from South Korea (n=144)

|                       |                       |                       |                |                       |                |
|-----------------------|-----------------------|-----------------------|----------------|-----------------------|----------------|
| <b>Season 2015-16</b> | EPI_ISL_378755        | EPI_ISL_376771        | EPI_ISL_369948 | EPI_ISL_502014        | EPI_ISL_427990 |
| EPI_ISL_253937        | EPI_ISL_378754        | EPI_ISL_320990        | EPI_ISL_370172 | EPI_ISL_368982        | EPI_ISL_427991 |
| EPI_ISL_258599        | EPI_ISL_258604        | EPI_ISL_331252        | EPI_ISL_502013 | EPI_ISL_369037        | EPI_ISL_427993 |
| EPI_ISL_212984        | EPI_ISL_258605        | EPI_ISL_310077        | EPI_ISL_502021 | EPI_ISL_369038        | EPI_ISL_414881 |
| EPI_ISL_212983        | EPI_ISL_378757        | EPI_ISL_310078        | EPI_ISL_502022 | EPI_ISL_502025        | EPI_ISL_405870 |
| EPI_ISL_302500        | <b>Season 2017-18</b> | EPI_ISL_310079        | EPI_ISL_502032 | EPI_ISL_370022        | EPI_ISL_414854 |
| EPI_ISL_253938        | EPI_ISL_311679        | EPI_ISL_331253        | EPI_ISL_502031 | EPI_ISL_502028        | EPI_ISL_485512 |
| EPI_ISL_258597        | EPI_ISL_292819        | EPI_ISL_321856        | EPI_ISL_368880 | EPI_ISL_502029        | EPI_ISL_485513 |
| EPI_ISL_258598        | EPI_ISL_307858        | EPI_ISL_373480        | EPI_ISL_405869 | EPI_ISL_502030        | EPI_ISL_485514 |
| EPI_ISL_302498        | EPI_ISL_331251        | EPI_ISL_376769        | EPI_ISL_366581 | EPI_ISL_376524        | EPI_ISL_485516 |
| <b>Season 2016-17</b> | EPI_ISL_376766        | EPI_ISL_320994        | EPI_ISL_366587 | EPI_ISL_376540        | EPI_ISL_405462 |
| EPI_ISL_378752        | EPI_ISL_292818        | EPI_ISL_307859        | EPI_ISL_366582 | EPI_ISL_376541        | EPI_ISL_405872 |
| EPI_ISL_302501        | EPI_ISL_376770        | EPI_ISL_376767        | EPI_ISL_501979 | EPI_ISL_376542        | EPI_ISL_414877 |
| EPI_ISL_258602        | EPI_ISL_505577        | <b>Season 2018-19</b> | EPI_ISL_369108 | EPI_ISL_376530        | EPI_ISL_405873 |
| EPI_ISL_258603        | EPI_ISL_376765        | EPI_ISL_502026        | EPI_ISL_502023 | <b>Season 2019-20</b> | EPI_ISL_485515 |
| EPI_ISL_292820        | EPI_ISL_376582        | EPI_ISL_346643        | EPI_ISL_366584 | EPI_ISL_414155        | EPI_ISL_414879 |
| EPI_ISL_302499        | EPI_ISL_376764        | EPI_ISL_366520        | EPI_ISL_366585 | EPI_ISL_405871        | EPI_ISL_414882 |
| EPI_ISL_378753        | EPI_ISL_376840        | EPI_ISL_370023        | EPI_ISL_366586 | EPI_ISL_405452        | EPI_ISL_414883 |
| EPI_ISL_378756        | EPI_ISL_321846        | EPI_ISL_341448        | EPI_ISL_366583 | EPI_ISL_405459        | EPI_ISL_414884 |
| EPI_ISL_292816        | EPI_ISL_505581        | EPI_ISL_341449        | EPI_ISL_366588 | EPI_ISL_435229        | EPI_ISL_414885 |
| EPI_ISL_292817        | EPI_ISL_505580        | EPI_ISL_370020        | EPI_ISL_366589 | EPI_ISL_405453        | EPI_ISL_414886 |
| EPI_ISL_258601        | EPI_ISL_376583        | EPI_ISL_370021        | EPI_ISL_366590 | EPI_ISL_412543        | EPI_ISL_414887 |
| EPI_ISL_258606        | EPI_ISL_307856        | EPI_ISL_502024        | EPI_ISL_366591 | EPI_ISL_414142        | EPI_ISL_414888 |
| EPI_ISL_258600        | EPI_ISL_376763        | EPI_ISL_366522        | EPI_ISL_372593 | EPI_ISL_414845        | EPI_ISL_414889 |
|                       | EPI_ISL_376768        | EPI_ISL_366523        | EPI_ISL_501980 | EPI_ISL_414851        | EPI_ISL_414890 |

#### Selected from Japan (n=1409)

|                       |                |                |                |                |                |
|-----------------------|----------------|----------------|----------------|----------------|----------------|
| <b>Season 2015-16</b> | EPI_ISL_213435 | EPI_ISL_205812 | EPI_ISL_235035 | EPI_ISL_218450 | EPI_ISL_235043 |
| EPI_ISL_225427        | EPI_ISL_218458 | EPI_ISL_208266 | EPI_ISL_229802 | EPI_ISL_218457 | EPI_ISL_222745 |
| EPI_ISL_205816        | EPI_ISL_222747 | EPI_ISL_214007 | EPI_ISL_229798 | EPI_ISL_224693 | EPI_ISL_229786 |
| EPI_ISL_236851        | EPI_ISL_229783 | EPI_ISL_218961 | EPI_ISL_225421 | EPI_ISL_229788 | EPI_ISL_229789 |
| EPI_ISL_224694        | EPI_ISL_215162 | EPI_ISL_229784 | EPI_ISL_224701 | EPI_ISL_229794 | EPI_ISL_224688 |
| EPI_ISL_218444        | EPI_ISL_229799 | EPI_ISL_229785 | EPI_ISL_224698 | EPI_ISL_213432 | EPI_ISL_215161 |
| EPI_ISL_225429        | EPI_ISL_236841 | EPI_ISL_232763 | EPI_ISL_224696 | EPI_ISL_218454 | EPI_ISL_213329 |
| EPI_ISL_224699        | EPI_ISL_236843 | EPI_ISL_229800 | EPI_ISL_224695 | EPI_ISL_224219 | EPI_ISL_222746 |
| EPI_ISL_231964        | EPI_ISL_225433 | EPI_ISL_229787 | EPI_ISL_224228 | EPI_ISL_229790 | EPI_ISL_224687 |
| EPI_ISL_231965        | EPI_ISL_229807 | EPI_ISL_224700 | EPI_ISL_222750 | EPI_ISL_229806 | EPI_ISL_229793 |
| EPI_ISL_210372        | EPI_ISL_224689 | EPI_ISL_218461 | EPI_ISL_222749 | EPI_ISL_231963 | EPI_ISL_236842 |
| EPI_ISL_218452        | EPI_ISL_215157 | EPI_ISL_215153 | EPI_ISL_218453 | EPI_ISL_237572 | EPI_ISL_208271 |
| EPI_ISL_218455        | EPI_ISL_231967 | EPI_ISL_210373 | EPI_ISL_229803 | EPI_ISL_203065 | EPI_ISL_202069 |
| EPI_ISL_224686        | EPI_ISL_210371 | EPI_ISL_208267 | EPI_ISL_218451 | EPI_ISL_208238 | EPI_ISL_213434 |
| EPI_ISL_231962        | EPI_ISL_215163 | EPI_ISL_208268 | EPI_ISL_218448 | EPI_ISL_203066 | EPI_ISL_208273 |
| EPI_ISL_222744        | EPI_ISL_224697 | EPI_ISL_205813 | EPI_ISL_215158 | EPI_ISL_203062 | EPI_ISL_203059 |
| EPI_ISL_236849        | EPI_ISL_215151 | EPI_ISL_205814 | EPI_ISL_215154 | EPI_ISL_203063 | EPI_ISL_210374 |
| EPI_ISL_224230        | EPI_ISL_222748 | EPI_ISL_203064 | EPI_ISL_210370 | EPI_ISL_203067 | EPI_ISL_218456 |
| EPI_ISL_225432        | EPI_ISL_235042 | EPI_ISL_211890 | EPI_ISL_205810 | EPI_ISL_208272 | EPI_ISL_213433 |
| EPI_ISL_224227        | EPI_ISL_229801 | EPI_ISL_229804 | EPI_ISL_205811 | EPI_ISL_202068 | EPI_ISL_213431 |
| EPI_ISL_218459        | EPI_ISL_224220 | EPI_ISL_215155 | EPI_ISL_215160 | EPI_ISL_208243 | EPI_ISL_215156 |
| EPI_ISL_222742        | EPI_ISL_225417 | EPI_ISL_236844 | EPI_ISL_218449 | EPI_ISL_237571 | EPI_ISL_202066 |

|                       |                |                |                |                |                |
|-----------------------|----------------|----------------|----------------|----------------|----------------|
| EPI_ISL_201174        | EPI_ISL_276995 | EPI_ISL_273494 | EPI_ISL_254701 | EPI_ISL_252777 | EPI_ISL_277007 |
| EPI_ISL_201175        | EPI_ISL_239595 | EPI_ISL_257708 | EPI_ISL_282950 | EPI_ISL_267782 | EPI_ISL_247735 |
| EPI_ISL_208241        | EPI_ISL_242819 | EPI_ISL_253081 | EPI_ISL_245988 | EPI_ISL_257924 | EPI_ISL_254710 |
| EPI_ISL_229791        | EPI_ISL_263355 | EPI_ISL_252779 | EPI_ISL_239587 | EPI_ISL_288997 | EPI_ISL_263347 |
| EPI_ISL_218460        | EPI_ISL_247746 | EPI_ISL_262076 | EPI_ISL_239593 | EPI_ISL_282948 | EPI_ISL_291149 |
| EPI_ISL_229796        | EPI_ISL_254714 | EPI_ISL_267063 | EPI_ISL_239599 | EPI_ISL_296094 | EPI_ISL_282947 |
| EPI_ISL_205815        | EPI_ISL_253079 | EPI_ISL_246757 | EPI_ISL_239615 | EPI_ISL_287740 | EPI_ISL_277006 |
| EPI_ISL_215165        | EPI_ISL_262990 | EPI_ISL_257928 | EPI_ISL_239621 | EPI_ISL_264335 | EPI_ISL_262090 |
| EPI_ISL_224222        | EPI_ISL_257917 | EPI_ISL_258258 | EPI_ISL_242823 | EPI_ISL_248913 | EPI_ISL_264338 |
| EPI_ISL_225420        | EPI_ISL_254706 | EPI_ISL_246759 | EPI_ISL_246741 | EPI_ISL_279061 | EPI_ISL_257927 |
| EPI_ISL_218446        | EPI_ISL_242839 | EPI_ISL_248932 | EPI_ISL_267775 | EPI_ISL_279060 | EPI_ISL_253182 |
| EPI_ISL_201173        | EPI_ISL_252772 | EPI_ISL_240549 | EPI_ISL_274668 | EPI_ISL_258262 | EPI_ISL_247736 |
| EPI_ISL_218447        | EPI_ISL_237972 | EPI_ISL_240725 | EPI_ISL_274669 | EPI_ISL_273490 | EPI_ISL_240729 |
| EPI_ISL_225431        | EPI_ISL_277002 | EPI_ISL_255894 | EPI_ISL_267783 | EPI_ISL_248917 | EPI_ISL_240731 |
| EPI_ISL_229792        | EPI_ISL_237971 | EPI_ISL_254699 | EPI_ISL_292541 | EPI_ISL_237967 | EPI_ISL_242835 |
| EPI_ISL_215164        | EPI_ISL_255898 | EPI_ISL_240543 | EPI_ISL_273492 | EPI_ISL_237973 | EPI_ISL_242840 |
| EPI_ISL_213436        | EPI_ISL_255899 | EPI_ISL_240544 | EPI_ISL_273493 | EPI_ISL_237974 | EPI_ISL_242841 |
| EPI_ISL_229797        | EPI_ISL_237566 | EPI_ISL_258252 | EPI_ISL_274664 | EPI_ISL_238900 | EPI_ISL_247738 |
| EPI_ISL_213430        | EPI_ISL_239606 | EPI_ISL_258254 | EPI_ISL_267057 | EPI_ISL_238901 | EPI_ISL_248920 |
| EPI_ISL_203060        | EPI_ISL_273506 | EPI_ISL_282956 | EPI_ISL_277429 | EPI_ISL_238902 | EPI_ISL_252765 |
| EPI_ISL_203061        | EPI_ISL_258255 | EPI_ISL_267781 | EPI_ISL_275598 | EPI_ISL_239589 | EPI_ISL_252767 |
| EPI_ISL_224702        | EPI_ISL_254702 | EPI_ISL_259766 | EPI_ISL_273495 | EPI_ISL_239617 | EPI_ISL_252768 |
| EPI_ISL_215150        | EPI_ISL_250877 | EPI_ISL_257926 | EPI_ISL_282951 | EPI_ISL_237975 | EPI_ISL_252769 |
| EPI_ISL_202310        | EPI_ISL_240542 | EPI_ISL_248908 | EPI_ISL_277433 | EPI_ISL_238903 | EPI_ISL_252773 |
| EPI_ISL_208269        | EPI_ISL_253068 | EPI_ISL_267058 | EPI_ISL_284431 | EPI_ISL_247741 | EPI_ISL_252774 |
| EPI_ISL_208270        | EPI_ISL_240559 | EPI_ISL_259771 | EPI_ISL_273496 | EPI_ISL_239594 | EPI_ISL_253075 |
| EPI_ISL_224692        | EPI_ISL_247743 | EPI_ISL_248927 | EPI_ISL_267785 | EPI_ISL_242818 | EPI_ISL_253082 |
| EPI_ISL_229805        | EPI_ISL_237417 | EPI_ISL_262088 | EPI_ISL_267066 | EPI_ISL_257918 | EPI_ISL_254712 |
| EPI_ISL_224691        | EPI_ISL_237420 | EPI_ISL_313911 | EPI_ISL_267062 | EPI_ISL_248930 | EPI_ISL_254715 |
| EPI_ISL_222743        | EPI_ISL_237421 | EPI_ISL_258268 | EPI_ISL_263348 | EPI_ISL_255895 | EPI_ISL_255896 |
| EPI_ISL_208245        | EPI_ISL_238898 | EPI_ISL_267784 | EPI_ISL_262080 | EPI_ISL_258264 | EPI_ISL_257707 |
| EPI_ISL_208242        | EPI_ISL_238899 | EPI_ISL_331214 | EPI_ISL_274663 | EPI_ISL_262069 | EPI_ISL_262987 |
| EPI_ISL_215152        | EPI_ISL_240541 | EPI_ISL_267065 | EPI_ISL_257921 | EPI_ISL_267776 | EPI_ISL_276993 |
| EPI_ISL_215159        | EPI_ISL_240546 | EPI_ISL_254703 | EPI_ISL_264320 | EPI_ISL_258270 | EPI_ISL_242836 |
| EPI_ISL_218445        | EPI_ISL_240547 | EPI_ISL_242837 | EPI_ISL_277430 | EPI_ISL_248903 | EPI_ISL_257714 |
| EPI_ISL_224690        | EPI_ISL_240548 | EPI_ISL_252770 | EPI_ISL_276998 | EPI_ISL_262082 | EPI_ISL_277434 |
| EPI_ISL_208244        | EPI_ISL_242838 | EPI_ISL_240557 | EPI_ISL_274667 | EPI_ISL_262078 | EPI_ISL_292542 |
| <b>Season 2016-17</b> | EPI_ISL_252771 | EPI_ISL_250878 | EPI_ISL_267778 | EPI_ISL_246754 | EPI_ISL_279062 |
| EPI_ISL_240561        | EPI_ISL_263350 | EPI_ISL_248928 | EPI_ISL_267064 | EPI_ISL_252776 | EPI_ISL_305340 |
| EPI_ISL_240563        | EPI_ISL_262071 | EPI_ISL_248924 | EPI_ISL_258261 | EPI_ISL_277427 | EPI_ISL_289002 |
| EPI_ISL_240555        | EPI_ISL_258266 | EPI_ISL_264337 | EPI_ISL_273498 | EPI_ISL_257704 | EPI_ISL_277439 |
| EPI_ISL_240027        | EPI_ISL_246740 | EPI_ISL_259773 | EPI_ISL_273499 | EPI_ISL_248925 | EPI_ISL_277437 |
| EPI_ISL_240545        | EPI_ISL_257919 | EPI_ISL_264332 | EPI_ISL_273497 | EPI_ISL_248918 | EPI_ISL_273503 |
| EPI_ISL_240552        | EPI_ISL_259764 | EPI_ISL_274670 | EPI_ISL_253080 | EPI_ISL_246742 | EPI_ISL_273502 |
| EPI_ISL_239585        | EPI_ISL_240551 | EPI_ISL_277001 | EPI_ISL_257929 | EPI_ISL_245992 | EPI_ISL_277431 |
| EPI_ISL_239590        | EPI_ISL_248905 | EPI_ISL_287738 | EPI_ISL_263353 | EPI_ISL_237568 | EPI_ISL_277435 |
| EPI_ISL_239613        | EPI_ISL_239609 | EPI_ISL_267067 | EPI_ISL_273501 | EPI_ISL_240550 | EPI_ISL_282946 |
| EPI_ISL_239618        | EPI_ISL_313910 | EPI_ISL_263356 | EPI_ISL_276999 | EPI_ISL_246753 | EPI_ISL_282952 |
| EPI_ISL_237565        | EPI_ISL_258271 | EPI_ISL_263352 | EPI_ISL_264330 | EPI_ISL_247742 | EPI_ISL_267056 |
| EPI_ISL_237567        | EPI_ISL_276992 | EPI_ISL_258263 | EPI_ISL_274685 | EPI_ISL_252775 | EPI_ISL_277441 |
| EPI_ISL_239586        | EPI_ISL_247739 | EPI_ISL_254698 | EPI_ISL_264321 | EPI_ISL_245991 | EPI_ISL_282955 |
| EPI_ISL_239603        | EPI_ISL_253074 | EPI_ISL_252778 | EPI_ISL_277438 | EPI_ISL_262086 | EPI_ISL_277432 |
| EPI_ISL_239614        | EPI_ISL_262986 | EPI_ISL_248907 | EPI_ISL_259772 | EPI_ISL_240562 | EPI_ISL_257930 |
| EPI_ISL_239604        | EPI_ISL_281381 | EPI_ISL_248902 | EPI_ISL_246755 | EPI_ISL_248922 | EPI_ISL_292540 |



|                |                |                |                       |                |                |
|----------------|----------------|----------------|-----------------------|----------------|----------------|
| EPI_ISL_277004 | EPI_ISL_242820 | EPI_ISL_273849 | EPI_ISL_257712        | EPI_ISL_320559 | EPI_ISL_316501 |
| EPI_ISL_273505 | EPI_ISL_242821 | EPI_ISL_258259 | EPI_ISL_253069        | EPI_ISL_319635 | EPI_ISL_316113 |
| EPI_ISL_267772 | EPI_ISL_252766 | EPI_ISL_253067 | EPI_ISL_248931        | EPI_ISL_311970 | EPI_ISL_316101 |
| EPI_ISL_263354 | EPI_ISL_239592 | EPI_ISL_257705 | EPI_ISL_237418        | EPI_ISL_311964 | EPI_ISL_315226 |
| EPI_ISL_254711 | EPI_ISL_239620 | EPI_ISL_258265 | EPI_ISL_240721        | EPI_ISL_293304 | EPI_ISL_315179 |
| EPI_ISL_254717 | EPI_ISL_264329 | EPI_ISL_248926 | EPI_ISL_248904        | EPI_ISL_306948 | EPI_ISL_314319 |
| EPI_ISL_258256 | EPI_ISL_245989 | EPI_ISL_273504 | EPI_ISL_282757        | EPI_ISL_306951 | EPI_ISL_314314 |
| EPI_ISL_277005 | EPI_ISL_237970 | EPI_ISL_282957 | EPI_ISL_264333        | EPI_ISL_319631 | EPI_ISL_314306 |
| EPI_ISL_262077 | EPI_ISL_259765 | EPI_ISL_246761 | EPI_ISL_257709        | EPI_ISL_308927 | EPI_ISL_314293 |
| EPI_ISL_282069 | EPI_ISL_263357 | EPI_ISL_263351 | EPI_ISL_239605        | EPI_ISL_316100 | EPI_ISL_310080 |
| EPI_ISL_276991 | EPI_ISL_263358 | EPI_ISL_257923 | EPI_ISL_240722        | EPI_ISL_366211 | EPI_ISL_311968 |
| EPI_ISL_262084 | EPI_ISL_255900 | EPI_ISL_274665 | EPI_ISL_255903        | EPI_ISL_313914 | EPI_ISL_315230 |
| EPI_ISL_240553 | EPI_ISL_250875 | EPI_ISL_287737 | EPI_ISL_255897        | EPI_ISL_306945 | EPI_ISL_315233 |
| EPI_ISL_249075 | EPI_ISL_239607 | EPI_ISL_248933 | EPI_ISL_237419        | EPI_ISL_320555 | EPI_ISL_376743 |
| EPI_ISL_259129 | EPI_ISL_247740 | EPI_ISL_254716 | EPI_ISL_264334        | EPI_ISL_322120 | EPI_ISL_307398 |
| EPI_ISL_240554 | EPI_ISL_248929 | EPI_ISL_248923 | EPI_ISL_262075        | EPI_ISL_320989 | EPI_ISL_306953 |
| EPI_ISL_263359 | EPI_ISL_257706 | EPI_ISL_254700 | EPI_ISL_262072        | EPI_ISL_320561 | EPI_ISL_291145 |
| EPI_ISL_254704 | EPI_ISL_254705 | EPI_ISL_248916 | EPI_ISL_258267        | EPI_ISL_320558 | EPI_ISL_310074 |
| EPI_ISL_267779 | EPI_ISL_262079 | EPI_ISL_258260 | EPI_ISL_250879        | EPI_ISL_315234 | EPI_ISL_314298 |
| EPI_ISL_257920 | EPI_ISL_253073 | EPI_ISL_264326 | EPI_ISL_240726        | EPI_ISL_315231 | EPI_ISL_310075 |
| EPI_ISL_277428 | EPI_ISL_262985 | EPI_ISL_264328 | <b>Season 2017-18</b> | EPI_ISL_314310 | EPI_ISL_319628 |
| EPI_ISL_263361 | EPI_ISL_253083 | EPI_ISL_246756 | EPI_ISL_310071        | EPI_ISL_308931 | EPI_ISL_330081 |
| EPI_ISL_263362 | EPI_ISL_250876 | EPI_ISL_281375 | EPI_ISL_320986        | EPI_ISL_306952 | EPI_ISL_376744 |
| EPI_ISL_263360 | EPI_ISL_237968 | EPI_ISL_257922 | EPI_ISL_311975        | EPI_ISL_373452 | EPI_ISL_313913 |
| EPI_ISL_262089 | EPI_ISL_240556 | EPI_ISL_267059 | EPI_ISL_316505        | EPI_ISL_376742 | EPI_ISL_291162 |
| EPI_ISL_259768 | EPI_ISL_237969 | EPI_ISL_255902 | EPI_ISL_320156        | EPI_ISL_376567 | EPI_ISL_315216 |
| EPI_ISL_259769 | EPI_ISL_277440 | EPI_ISL_239608 | EPI_ISL_308924        | EPI_ISL_330082 | EPI_ISL_305562 |
| EPI_ISL_259770 | EPI_ISL_282958 | EPI_ISL_258257 | EPI_ISL_331843        | EPI_ISL_315228 | EPI_ISL_315180 |
| EPI_ISL_258253 | EPI_ISL_247737 | EPI_ISL_248906 | EPI_ISL_320569        | EPI_ISL_314322 | EPI_ISL_288995 |
| EPI_ISL_246760 | EPI_ISL_273507 | EPI_ISL_239601 | EPI_ISL_319638        | EPI_ISL_322118 | EPI_ISL_289504 |
| EPI_ISL_248914 | EPI_ISL_267773 | EPI_ISL_239602 | EPI_ISL_319637        | EPI_ISL_330085 | EPI_ISL_289505 |
| EPI_ISL_248921 | EPI_ISL_267060 | EPI_ISL_264327 | EPI_ISL_315229        | EPI_ISL_322117 | EPI_ISL_293302 |
| EPI_ISL_253076 | EPI_ISL_274666 | EPI_ISL_282962 | EPI_ISL_314317        | EPI_ISL_320155 | EPI_ISL_311965 |
| EPI_ISL_257716 | EPI_ISL_273500 | EPI_ISL_259767 | EPI_ISL_315219        | EPI_ISL_319634 | EPI_ISL_316099 |
| EPI_ISL_267780 | EPI_ISL_277003 | EPI_ISL_254697 | EPI_ISL_310076        | EPI_ISL_319633 | EPI_ISL_288994 |
| EPI_ISL_254713 | EPI_ISL_276996 | EPI_ISL_262070 | EPI_ISL_315223        | EPI_ISL_319630 | EPI_ISL_288990 |
| EPI_ISL_240558 | EPI_ISL_276994 | EPI_ISL_237569 | EPI_ISL_330083        | EPI_ISL_316502 | EPI_ISL_291172 |
| EPI_ISL_240560 | EPI_ISL_268527 | EPI_ISL_253078 | EPI_ISL_319632        | EPI_ISL_316109 | EPI_ISL_293301 |
| EPI_ISL_239600 | EPI_ISL_267774 | EPI_ISL_262989 | EPI_ISL_316098        | EPI_ISL_316103 | EPI_ISL_314296 |
| EPI_ISL_246758 | EPI_ISL_276997 | EPI_ISL_240728 | EPI_ISL_311971        | EPI_ISL_315225 | EPI_ISL_314297 |
| EPI_ISL_257715 | EPI_ISL_267777 | EPI_ISL_237564 | EPI_ISL_316105        | EPI_ISL_313909 | EPI_ISL_304124 |
| EPI_ISL_258269 | EPI_ISL_267068 | EPI_ISL_262074 | EPI_ISL_320566        | EPI_ISL_307389 | EPI_ISL_302796 |
| EPI_ISL_263349 | EPI_ISL_262083 | EPI_ISL_240727 | EPI_ISL_320560        | EPI_ISL_293299 | EPI_ISL_288991 |
| EPI_ISL_253077 | EPI_ISL_247744 | EPI_ISL_248919 | EPI_ISL_314308        | EPI_ISL_319626 | EPI_ISL_291163 |
| EPI_ISL_262988 | EPI_ISL_262073 | EPI_ISL_240723 | EPI_ISL_322113        | EPI_ISL_315235 | EPI_ISL_292813 |
| EPI_ISL_239598 | EPI_ISL_262081 | EPI_ISL_240724 | EPI_ISL_320564        | EPI_ISL_319629 | EPI_ISL_311963 |
| EPI_ISL_242822 | EPI_ISL_262085 | EPI_ISL_253164 | EPI_ISL_314307        | EPI_ISL_376570 | EPI_ISL_289509 |
| EPI_ISL_239588 | EPI_ISL_262087 | EPI_ISL_255901 | EPI_ISL_307392        | EPI_ISL_376745 | EPI_ISL_305553 |
| EPI_ISL_239591 | EPI_ISL_263363 | EPI_ISL_239611 | EPI_ISL_314321        | EPI_ISL_331841 | EPI_ISL_320562 |
| EPI_ISL_239596 | EPI_ISL_263364 | EPI_ISL_242834 | EPI_ISL_322115        | EPI_ISL_331619 | EPI_ISL_307396 |
| EPI_ISL_239597 | EPI_ISL_277000 | EPI_ISL_240028 | EPI_ISL_311974        | EPI_ISL_330581 | EPI_ISL_307399 |
| EPI_ISL_239616 | EPI_ISL_257925 | EPI_ISL_254696 | EPI_ISL_320988        | EPI_ISL_322114 | EPI_ISL_327656 |
| EPI_ISL_239619 | EPI_ISL_277436 | EPI_ISL_257713 | EPI_ISL_308926        | EPI_ISL_319636 | EPI_ISL_307394 |
| EPI_ISL_240730 | EPI_ISL_245990 | EPI_ISL_239610 | EPI_ISL_330584        | EPI_ISL_319627 | EPI_ISL_297229 |

|                |                |                       |                |                 |                 |
|----------------|----------------|-----------------------|----------------|-----------------|-----------------|
| EPI_ISL_304126 | EPI_ISL_320154 | EPI_ISL_297226        | EPI_ISL_345215 | EPI_ISL_376980  | EPI_ISL_356445  |
| EPI_ISL_315224 | EPI_ISL_291147 | EPI_ISL_311962        | EPI_ISL_364629 | EPI_ISL_344511  | EPI_ISL_356868  |
| EPI_ISL_306949 | EPI_ISL_297222 | EPI_ISL_292809        | EPI_ISL_346656 | EPI_ISL_344509  | EPI_ISL_356869  |
| EPI_ISL_294306 | EPI_ISL_294323 | EPI_ISL_311969        | EPI_ISL_502011 | EPI_ISL_376975  | EPI_ISL_361865  |
| EPI_ISL_315227 | EPI_ISL_304127 | EPI_ISL_376741        | EPI_ISL_405843 | EPI_ISL_341454  | EPI_ISL_364625  |
| EPI_ISL_306943 | EPI_ISL_315232 | EPI_ISL_315222        | EPI_ISL_395206 | EPI_ISL_341445  | EPI_ISL_364626  |
| EPI_ISL_297225 | EPI_ISL_315215 | EPI_ISL_291161        | EPI_ISL_391436 | EPI_ISL_340691  | EPI_ISL_365569  |
| EPI_ISL_376568 | EPI_ISL_314315 | EPI_ISL_307390        | EPI_ISL_389100 | EPI_ISL_340692  | EPI_ISL_365574  |
| EPI_ISL_311961 | EPI_ISL_306503 | EPI_ISL_307391        | EPI_ISL_381715 | EPI_ISL_337457  | EPI_ISL_366073  |
| EPI_ISL_311972 | EPI_ISL_306954 | EPI_ISL_322116        | EPI_ISL_376985 | EPI_ISL_337458  | EPI_ISL_366074  |
| EPI_ISL_291141 | EPI_ISL_315217 | EPI_ISL_327653        | EPI_ISL_376986 | EPI_ISL_340689  | EPI_ISL_366088  |
| EPI_ISL_312784 | EPI_ISL_306946 | EPI_ISL_327652        | EPI_ISL_376971 | EPI_ISL_340690  | EPI_ISL_366089  |
| EPI_ISL_311966 | EPI_ISL_292806 | EPI_ISL_297227        | EPI_ISL_376970 | EPI_ISL_336975  | EPI_ISL_366095  |
| EPI_ISL_320568 | EPI_ISL_302790 | EPI_ISL_308928        | EPI_ISL_376969 | EPI_ISL_405846  | EPI_ISL_366097  |
| EPI_ISL_314313 | EPI_ISL_308930 | EPI_ISL_320987        | EPI_ISL_376972 | EPI_ISL_376979  | EPI_ISL_366111  |
| EPI_ISL_316108 | EPI_ISL_311967 | EPI_ISL_316107        | EPI_ISL_371938 | EPI_ISL_405836  | EPI_ISL_366538  |
| EPI_ISL_306687 | EPI_ISL_312777 | EPI_ISL_330582        | EPI_ISL_371936 | EPI_ISL_348324  | EPI_ISL_366699  |
| EPI_ISL_306685 | EPI_ISL_315177 | EPI_ISL_308933        | EPI_ISL_370112 | EPI_ISL_376976  | EPI_ISL_366748  |
| EPI_ISL_312771 | EPI_ISL_314312 | EPI_ISL_327657        | EPI_ISL_369912 | EPI_ISL_1716902 | EPI_ISL_370352  |
| EPI_ISL_299134 | EPI_ISL_307397 | EPI_ISL_330084        | EPI_ISL_366747 | EPI_ISL_405849  | EPI_ISL_370593  |
| EPI_ISL_306686 | EPI_ISL_313912 | EPI_ISL_320567        | EPI_ISL_371926 | EPI_ISL_405848  | EPI_ISL_371924  |
| EPI_ISL_312772 | EPI_ISL_306947 | EPI_ISL_320565        | EPI_ISL_371933 | EPI_ISL_405838  | EPI_ISL_371925  |
| EPI_ISL_312785 | EPI_ISL_304125 | EPI_ISL_302789        | EPI_ISL_371937 | EPI_ISL_405837  | EPI_ISL_371929  |
| EPI_ISL_294304 | EPI_ISL_306682 | EPI_ISL_327663        | EPI_ISL_366539 | EPI_ISL_333607  | EPI_ISL_371934  |
| EPI_ISL_306684 | EPI_ISL_314309 | EPI_ISL_320563        | EPI_ISL_366478 | EPI_ISL_333609  | EPI_ISL_371935  |
| EPI_ISL_312770 | EPI_ISL_304128 | EPI_ISL_314320        | EPI_ISL_366114 | EPI_ISL_332908  | EPI_ISL_376968  |
| EPI_ISL_282944 | EPI_ISL_320556 | <b>Season 2018-19</b> | EPI_ISL_366113 | EPI_ISL_332911  | EPI_ISL_376973  |
| EPI_ISL_282945 | EPI_ISL_289510 | EPI_ISL_356427        | EPI_ISL_366099 | EPI_ISL_336970  | EPI_ISL_376977  |
| EPI_ISL_331842 | EPI_ISL_306504 | EPI_ISL_346663        | EPI_ISL_376966 | EPI_ISL_339720  | EPI_ISL_391099  |
| EPI_ISL_315221 | EPI_ISL_308929 | EPI_ISL_346660        | EPI_ISL_366091 | EPI_ISL_339839  | EPI_ISL_395227  |
| EPI_ISL_291138 | EPI_ISL_294324 | EPI_ISL_346653        | EPI_ISL_366082 | EPI_ISL_340694  | EPI_ISL_395228  |
| EPI_ISL_289507 | EPI_ISL_315220 | EPI_ISL_345227        | EPI_ISL_366078 | EPI_ISL_340695  | EPI_ISL_395229  |
| EPI_ISL_315178 | EPI_ISL_294302 | EPI_ISL_356746        | EPI_ISL_366077 | EPI_ISL_340696  | EPI_ISL_395230  |
| EPI_ISL_305563 | EPI_ISL_299135 | EPI_ISL_345216        | EPI_ISL_365581 | EPI_ISL_340697  | EPI_ISL_395308  |
| EPI_ISL_308923 | EPI_ISL_320984 | EPI_ISL_354788        | EPI_ISL_365571 | EPI_ISL_340698  | EPI_ISL_398728  |
| EPI_ISL_308925 | EPI_ISL_310072 | EPI_ISL_357493        | EPI_ISL_363749 | EPI_ISL_340699  | EPI_ISL_400632  |
| EPI_ISL_316102 | EPI_ISL_291160 | EPI_ISL_364630        | EPI_ISL_357499 | EPI_ISL_341446  | EPI_ISL_1716901 |
| EPI_ISL_314318 | EPI_ISL_288992 | EPI_ISL_366079        | EPI_ISL_357494 | EPI_ISL_341447  | EPI_ISL_346664  |
| EPI_ISL_311973 | EPI_ISL_320985 | EPI_ISL_344522        | EPI_ISL_356878 | EPI_ISL_341453  | EPI_ISL_412121  |
| EPI_ISL_314305 | EPI_ISL_288996 | EPI_ISL_405845        | EPI_ISL_356751 | EPI_ISL_344519  | EPI_ISL_361860  |
| EPI_ISL_315218 | EPI_ISL_289508 | EPI_ISL_395205        | EPI_ISL_356430 | EPI_ISL_344521  | EPI_ISL_361861  |
| EPI_ISL_306944 | EPI_ISL_288989 | EPI_ISL_348326        | EPI_ISL_347536 | EPI_ISL_345211  | EPI_ISL_336977  |
| EPI_ISL_314316 | EPI_ISL_304122 | EPI_ISL_356428        | EPI_ISL_346650 | EPI_ISL_345212  | EPI_ISL_357495  |
| EPI_ISL_297218 | EPI_ISL_306950 | EPI_ISL_356429        | EPI_ISL_346649 | EPI_ISL_345223  | EPI_ISL_333921  |
| EPI_ISL_293298 | EPI_ISL_291164 | EPI_ISL_361863        | EPI_ISL_345225 | EPI_ISL_345226  | EPI_ISL_333922  |
| EPI_ISL_291137 | EPI_ISL_297219 | EPI_ISL_398303        | EPI_ISL_345222 | EPI_ISL_346065  | EPI_ISL_333924  |
| EPI_ISL_289506 | EPI_ISL_316106 | EPI_ISL_391100        | EPI_ISL_356741 | EPI_ISL_346227  | EPI_ISL_333927  |
| EPI_ISL_289502 | EPI_ISL_314311 | EPI_ISL_381707        | EPI_ISL_376974 | EPI_ISL_346654  | EPI_ISL_336959  |
| EPI_ISL_297223 | EPI_ISL_308932 | EPI_ISL_365575        | EPI_ISL_345218 | EPI_ISL_346655  | EPI_ISL_1005694 |
| EPI_ISL_288993 | EPI_ISL_304121 | EPI_ISL_357497        | EPI_ISL_345219 | EPI_ISL_346657  | EPI_ISL_356425  |
| EPI_ISL_320554 | EPI_ISL_304123 | EPI_ISL_405842        | EPI_ISL_366080 | EPI_ISL_348322  | EPI_ISL_376978  |
| EPI_ISL_320153 | EPI_ISL_320557 | EPI_ISL_364628        | EPI_ISL_366081 | EPI_ISL_356432  | EPI_ISL_376982  |
| EPI_ISL_289503 | EPI_ISL_316104 | EPI_ISL_356433        | EPI_ISL_366084 | EPI_ISL_356436  | EPI_ISL_1716903 |
| EPI_ISL_297220 | EPI_ISL_310073 | EPI_ISL_356446        | EPI_ISL_344520 | EPI_ISL_356442  | EPI_ISL_366070  |

|                |                 |                |                       |                 |                |
|----------------|-----------------|----------------|-----------------------|-----------------|----------------|
| EPI_ISL_366096 | EPI_ISL_369763  | EPI_ISL_370355 | EPI_ISL_405847        | EPI_ISL_572186  | EPI_ISL_405852 |
| EPI_ISL_336965 | EPI_ISL_369764  | EPI_ISL_370108 | EPI_ISL_366108        | EPI_ISL_1064126 | EPI_ISL_480453 |
| EPI_ISL_337451 | EPI_ISL_370113  | EPI_ISL_370111 | EPI_ISL_395208        | EPI_ISL_577615  | EPI_ISL_414387 |
| EPI_ISL_337452 | EPI_ISL_341441  | EPI_ISL_363750 | EPI_ISL_356426        | EPI_ISL_1064124 | EPI_ISL_405855 |
| EPI_ISL_337453 | EPI_ISL_1005690 | EPI_ISL_354789 | EPI_ISL_366083        | EPI_ISL_498215  | EPI_ISL_405857 |
| EPI_ISL_370109 | EPI_ISL_337455  | EPI_ISL_363718 | EPI_ISL_366085        | EPI_ISL_415179  | EPI_ISL_405853 |
| EPI_ISL_333920 | EPI_ISL_337456  | EPI_ISL_348325 | EPI_ISL_366086        | EPI_ISL_403088  | EPI_ISL_684048 |
| EPI_ISL_333931 | EPI_ISL_337459  | EPI_ISL_405830 | EPI_ISL_369705        | EPI_ISL_395532  | EPI_ISL_684049 |
| EPI_ISL_333928 | EPI_ISL_337460  | EPI_ISL_376984 | EPI_ISL_340687        | EPI_ISL_411135  | EPI_ISL_684050 |
| EPI_ISL_336961 | EPI_ISL_340021  | EPI_ISL_370595 | EPI_ISL_336960        | EPI_ISL_413234  | EPI_ISL_400568 |
| EPI_ISL_372696 | EPI_ISL_1716900 | EPI_ISL_370364 | EPI_ISL_340686        | EPI_ISL_405850  | EPI_ISL_428430 |
| EPI_ISL_395209 | EPI_ISL_364627  | EPI_ISL_366876 | EPI_ISL_381721        | EPI_ISL_395536  | EPI_ISL_517667 |
| EPI_ISL_411127 | EPI_ISL_336974  | EPI_ISL_366110 | EPI_ISL_392485        | EPI_ISL_419328  | EPI_ISL_594224 |
| EPI_ISL_413232 | EPI_ISL_1005691 | EPI_ISL_366094 | EPI_ISL_398305        | EPI_ISL_428433  | EPI_ISL_398727 |
| EPI_ISL_398729 | EPI_ISL_370354  | EPI_ISL_366093 | EPI_ISL_363725        | EPI_ISL_414386  | EPI_ISL_400565 |
| EPI_ISL_505770 | EPI_ISL_1716904 | EPI_ISL_366090 | EPI_ISL_366746        | EPI_ISL_480452  | EPI_ISL_415178 |
| EPI_ISL_395204 | EPI_ISL_356440  | EPI_ISL_366071 | EPI_ISL_363744        | EPI_ISL_414390  | EPI_ISL_498218 |
| EPI_ISL_333926 | EPI_ISL_365585  | EPI_ISL_357504 | EPI_ISL_341451        | EPI_ISL_454740  | EPI_ISL_405851 |
| EPI_ISL_395207 | EPI_ISL_364651  | EPI_ISL_356871 | EPI_ISL_341452        | EPI_ISL_417061  | EPI_ISL_535490 |
| EPI_ISL_340018 | EPI_ISL_394199  | EPI_ISL_356748 | EPI_ISL_405829        | EPI_ISL_498206  | EPI_ISL_414388 |
| EPI_ISL_346644 | EPI_ISL_371922  | EPI_ISL_356742 | EPI_ISL_1005692       | EPI_ISL_405877  | EPI_ISL_392480 |
| EPI_ISL_336962 | EPI_ISL_363479  | EPI_ISL_356447 | EPI_ISL_356444        | EPI_ISL_414391  | EPI_ISL_392482 |
| EPI_ISL_336964 | EPI_ISL_344510  | EPI_ISL_356434 | EPI_ISL_405835        | EPI_ISL_414392  | EPI_ISL_583905 |
| EPI_ISL_333923 | EPI_ISL_345224  | EPI_ISL_356431 | EPI_ISL_405833        | EPI_ISL_498205  | EPI_ISL_428428 |
| EPI_ISL_376967 | EPI_ISL_333608  | EPI_ISL_352951 | EPI_ISL_366749        | EPI_ISL_408571  | EPI_ISL_414397 |
| EPI_ISL_336973 | EPI_ISL_332909  | EPI_ISL_350485 | EPI_ISL_371930        | EPI_ISL_428427  | EPI_ISL_408546 |
| EPI_ISL_341442 | EPI_ISL_332910  | EPI_ISL_350486 | EPI_ISL_1005693       | EPI_ISL_428435  | EPI_ISL_414396 |
| EPI_ISL_332411 | EPI_ISL_361864  | EPI_ISL_366072 | EPI_ISL_394188        | EPI_ISL_498209  | EPI_ISL_584120 |
| EPI_ISL_376983 | EPI_ISL_371923  | EPI_ISL_347535 | EPI_ISL_366098        | EPI_ISL_415176  | EPI_ISL_405880 |
| EPI_ISL_336963 | EPI_ISL_368916  | EPI_ISL_344513 | EPI_ISL_365582        | EPI_ISL_710501  | EPI_ISL_414382 |
| EPI_ISL_346658 | EPI_ISL_366479  | EPI_ISL_344512 | EPI_ISL_356870        | EPI_ISL_415183  | EPI_ISL_517684 |
| EPI_ISL_363478 | EPI_ISL_364641  | EPI_ISL_356747 | EPI_ISL_348323        | EPI_ISL_577614  | EPI_ISL_417063 |
| EPI_ISL_333919 | EPI_ISL_346647  | EPI_ISL_341444 | EPI_ISL_346645        | EPI_ISL_577616  | EPI_ISL_469258 |
| EPI_ISL_376981 | EPI_ISL_346648  | EPI_ISL_364654 | EPI_ISL_344523        | EPI_ISL_710502  | EPI_ISL_428434 |
| EPI_ISL_336969 | EPI_ISL_333917  | EPI_ISL_365572 | EPI_ISL_357502        | EPI_ISL_577608  | EPI_ISL_454747 |
| EPI_ISL_370351 | EPI_ISL_365570  | EPI_ISL_366075 | EPI_ISL_370594        | EPI_ISL_498217  | EPI_ISL_517683 |
| EPI_ISL_336971 | EPI_ISL_333930  | EPI_ISL_366112 | EPI_ISL_370353        | EPI_ISL_684054  | EPI_ISL_584121 |
| EPI_ISL_336968 | EPI_ISL_333918  | EPI_ISL_371927 | EPI_ISL_356752        | EPI_ISL_684053  | EPI_ISL_405878 |
| EPI_ISL_331837 | EPI_ISL_341439  | EPI_ISL_356872 | EPI_ISL_356753        | EPI_ISL_454745  | EPI_ISL_415182 |
| EPI_ISL_339838 | EPI_ISL_376987  | EPI_ISL_336976 | EPI_ISL_356875        | EPI_ISL_498216  | EPI_ISL_414393 |
| EPI_ISL_341440 | EPI_ISL_333929  | EPI_ISL_341443 | EPI_ISL_356876        | EPI_ISL_684052  | EPI_ISL_480451 |
| EPI_ISL_336966 | EPI_ISL_336972  | EPI_ISL_346659 | EPI_ISL_356877        | EPI_ISL_400553  | EPI_ISL_710500 |
| EPI_ISL_346662 | EPI_ISL_505769  | EPI_ISL_356874 | EPI_ISL_405828        | EPI_ISL_411130  | EPI_ISL_400582 |
| EPI_ISL_336967 | EPI_ISL_356873  | EPI_ISL_357500 | EPI_ISL_371939        | EPI_ISL_413233  | EPI_ISL_684051 |
| EPI_ISL_363715 | EPI_ISL_370110  | EPI_ISL_363714 | EPI_ISL_371932        | EPI_ISL_415177  | EPI_ISL_405879 |
| EPI_ISL_357498 | EPI_ISL_370356  | EPI_ISL_365573 | EPI_ISL_366100        | EPI_ISL_428437  | EPI_ISL_480454 |
| EPI_ISL_332409 | EPI_ISL_357505  | EPI_ISL_366076 | EPI_ISL_366092        | EPI_ISL_395196  | EPI_ISL_400577 |
| EPI_ISL_333925 | EPI_ISL_371928  | EPI_ISL_371931 | EPI_ISL_365576        | EPI_ISL_419327  | EPI_ISL_400583 |
| EPI_ISL_348327 | EPI_ISL_370362  | EPI_ISL_391422 | EPI_ISL_363716        | EPI_ISL_419329  | EPI_ISL_428429 |
| EPI_ISL_346661 | EPI_ISL_392484  | EPI_ISL_391435 | EPI_ISL_357501        | EPI_ISL_684055  | EPI_ISL_400618 |
| EPI_ISL_378923 | EPI_ISL_381720  | EPI_ISL_395226 | <b>Season 2019-20</b> | EPI_ISL_428426  |                |
| EPI_ISL_369762 | EPI_ISL_376965  | EPI_ISL_405844 | EPI_ISL_480456        | EPI_ISL_415180  |                |

**Selected from UK (n=391)**

| <b>Season 2015-16</b> |                | <b>Season 2017-18</b> |                |                       |                       |
|-----------------------|----------------|-----------------------|----------------|-----------------------|-----------------------|
| EPI_ISL_233165        | EPI_ISL_270533 | EPI_ISL_304944        | EPI_ISL_292307 | EPI_ISL_292300        | EPI_ISL_350624        |
| EPI_ISL_237666        | EPI_ISL_270443 | EPI_ISL_303429        | EPI_ISL_292264 | EPI_ISL_291034        | EPI_ISL_366466        |
| EPI_ISL_237667        | EPI_ISL_270548 | EPI_ISL_304784        | EPI_ISL_298102 | EPI_ISL_301542        | EPI_ISL_369692        |
| EPI_ISL_237598        | EPI_ISL_270396 | EPI_ISL_291096        | EPI_ISL_291009 | EPI_ISL_301525        | EPI_ISL_370504        |
| EPI_ISL_237599        | EPI_ISL_270419 | EPI_ISL_312048        | EPI_ISL_291095 | EPI_ISL_301537        | EPI_ISL_350731        |
| EPI_ISL_241329        | EPI_ISL_286817 | EPI_ISL_304850        | EPI_ISL_293680 | EPI_ISL_304761        | EPI_ISL_343206        |
| EPI_ISL_241278        | EPI_ISL_286830 | EPI_ISL_303310        | EPI_ISL_303362 | EPI_ISL_301461        | EPI_ISL_366731        |
| EPI_ISL_237600        | EPI_ISL_270407 | EPI_ISL_313954        | EPI_ISL_309451 | EPI_ISL_292274        | EPI_ISL_335689        |
| EPI_ISL_241210        | EPI_ISL_248489 | EPI_ISL_304829        | EPI_ISL_327404 | EPI_ISL_301541        | EPI_ISL_364744        |
| EPI_ISL_241243        | EPI_ISL_270392 | EPI_ISL_312132        | EPI_ISL_303412 | <b>Season 2018-19</b> | EPI_ISL_356536        |
| EPI_ISL_241446        | EPI_ISL_270413 | EPI_ISL_303361        | EPI_ISL_303515 | EPI_ISL_366945        | EPI_ISL_513974        |
| EPI_ISL_203379        | EPI_ISL_290995 | EPI_ISL_304891        | EPI_ISL_312094 | EPI_ISL_389199        | <b>Season 2019-20</b> |
| EPI_ISL_241294        | EPI_ISL_286908 | EPI_ISL_301429        | EPI_ISL_312051 | EPI_ISL_356573        | EPI_ISL_470987        |
| <b>Season 2016-17</b> | EPI_ISL_269817 | EPI_ISL_303321        | EPI_ISL_312033 | EPI_ISL_364714        | EPI_ISL_480491        |
| EPI_ISL_270544        | EPI_ISL_302187 | EPI_ISL_294238        | EPI_ISL_307639 | EPI_ISL_514053        | EPI_ISL_428546        |
| EPI_ISL_286844        | EPI_ISL_269897 | EPI_ISL_298087        | EPI_ISL_304937 | EPI_ISL_514048        | EPI_ISL_480457        |
| EPI_ISL_302464        | EPI_ISL_269819 | EPI_ISL_301437        | EPI_ISL_304899 | EPI_ISL_514050        | EPI_ISL_459781        |
| EPI_ISL_270470        | EPI_ISL_286787 | EPI_ISL_304901        | EPI_ISL_304895 | EPI_ISL_514010        | EPI_ISL_428599        |
| EPI_ISL_270522        | EPI_ISL_286790 | EPI_ISL_298096        | EPI_ISL_304895 | EPI_ISL_514042        | EPI_ISL_428598        |
| EPI_ISL_270784        | EPI_ISL_286790 | EPI_ISL_301398        | EPI_ISL_303430 | EPI_ISL_399804        | EPI_ISL_416208        |
| EPI_ISL_270528        | EPI_ISL_269825 | EPI_ISL_292244        | EPI_ISL_303375 | EPI_ISL_514011        | EPI_ISL_459728        |
| EPI_ISL_248537        | EPI_ISL_269827 | EPI_ISL_309442        | EPI_ISL_303353 | EPI_ISL_369067        | EPI_ISL_480464        |
| EPI_ISL_270550        | EPI_ISL_269865 | EPI_ISL_303391        | EPI_ISL_301539 | EPI_ISL_389203        | EPI_ISL_470930        |
| EPI_ISL_270471        | EPI_ISL_269902 | EPI_ISL_292291        | EPI_ISL_301480 | EPI_ISL_364713        | EPI_ISL_459750        |
| EPI_ISL_270531        | EPI_ISL_269846 | EPI_ISL_301538        | EPI_ISL_298083 | EPI_ISL_514035        | EPI_ISL_428614        |
| EPI_ISL_270491        | EPI_ISL_269877 | EPI_ISL_303391        | EPI_ISL_301477 | EPI_ISL_389207        | EPI_ISL_408292        |
| EPI_ISL_270568        | EPI_ISL_269834 | EPI_ISL_301538        | EPI_ISL_301529 | EPI_ISL_343203        | EPI_ISL_408064        |
| EPI_ISL_276317        | EPI_ISL_274890 | EPI_ISL_301453        | EPI_ISL_303366 | EPI_ISL_347140        | EPI_ISL_408012        |
| EPI_ISL_270420        | EPI_ISL_269791 | EPI_ISL_304918        | EPI_ISL_304832 | EPI_ISL_347143        | EPI_ISL_405163        |
| EPI_ISL_270475        | EPI_ISL_248548 | EPI_ISL_312057        | EPI_ISL_304915 | EPI_ISL_351410        | EPI_ISL_405163        |
| EPI_ISL_270448        | EPI_ISL_269805 | EPI_ISL_304939        | EPI_ISL_307644 | EPI_ISL_334408        | EPI_ISL_405222        |
| EPI_ISL_270428        | EPI_ISL_269845 | EPI_ISL_304883        | EPI_ISL_309428 | EPI_ISL_336080        | EPI_ISL_405135        |
| EPI_ISL_248497        | EPI_ISL_270782 | EPI_ISL_304846        | EPI_ISL_312065 | EPI_ISL_338759        | EPI_ISL_405132        |
| EPI_ISL_274635        | EPI_ISL_239768 | EPI_ISL_303415        | EPI_ISL_301467 | EPI_ISL_514056        | EPI_ISL_405132        |
| EPI_ISL_270514        | EPI_ISL_269802 | EPI_ISL_301497        | EPI_ISL_309461 | EPI_ISL_513997        | EPI_ISL_405129        |
| EPI_ISL_270514        | EPI_ISL_274392 | EPI_ISL_301403        | EPI_ISL_286855 | EPI_ISL_514014        | EPI_ISL_405095        |
| EPI_ISL_270466        | EPI_ISL_270770 | EPI_ISL_301403        | EPI_ISL_301451 | EPI_ISL_514005        | EPI_ISL_408109        |
| EPI_ISL_248572        | EPI_ISL_270770 | EPI_ISL_293625        | EPI_ISL_291018 | EPI_ISL_356580        | EPI_ISL_400614        |
| EPI_ISL_270765        | EPI_ISL_269900 | EPI_ISL_301451        | EPI_ISL_304782 | EPI_ISL_357338        | EPI_ISL_405128        |
| EPI_ISL_270521        | EPI_ISL_269855 | EPI_ISL_313830        | EPI_ISL_291018 | EPI_ISL_387437        | EPI_ISL_405218        |
| EPI_ISL_270525        | EPI_ISL_269820 | EPI_ISL_313957        | EPI_ISL_309468 | EPI_ISL_399783        | EPI_ISL_405257        |
| EPI_ISL_270559        | EPI_ISL_269821 | EPI_ISL_292301        | EPI_ISL_301456 | EPI_ISL_356708        | EPI_ISL_405257        |
| EPI_ISL_270562        | EPI_ISL_269889 | EPI_ISL_304951        | EPI_ISL_298012 | EPI_ISL_514017        | EPI_ISL_408033        |
| EPI_ISL_270565        | EPI_ISL_274658 | EPI_ISL_327409        | EPI_ISL_304782 | EPI_ISL_514025        | EPI_ISL_408055        |
| EPI_ISL_270814        | EPI_ISL_270787 | EPI_ISL_312059        | EPI_ISL_304782 | EPI_ISL_356575        | EPI_ISL_408100        |
| EPI_ISL_248483        | EPI_ISL_269792 | EPI_ISL_309470        | EPI_ISL_291015 | EPI_ISL_399787        | EPI_ISL_408100        |
| EPI_ISL_248487        | EPI_ISL_248508 | EPI_ISL_303380        | EPI_ISL_327401 | EPI_ISL_338758        | EPI_ISL_408316        |
| EPI_ISL_248487        | EPI_ISL_269824 | EPI_ISL_298093        | EPI_ISL_291002 | EPI_ISL_369014        | EPI_ISL_428567        |
| EPI_ISL_248515        | EPI_ISL_269892 | EPI_ISL_303380        | EPI_ISL_301490 | EPI_ISL_356460        | EPI_ISL_459804        |
| EPI_ISL_270451        | EPI_ISL_286788 | EPI_ISL_298093        | EPI_ISL_301490 | EPI_ISL_336081        | EPI_ISL_480541        |
| EPI_ISL_270451        | EPI_ISL_269826 |                       |                | EPI_ISL_336082        |                       |
| EPI_ISL_270464        | EPI_ISL_248506 |                       |                |                       |                       |
| EPI_ISL_270485        | EPI_ISL_270759 |                       |                |                       |                       |
| EPI_ISL_270504        | EPI_ISL_248553 |                       |                |                       |                       |

|                |                |                |                |                |                |
|----------------|----------------|----------------|----------------|----------------|----------------|
| EPI_ISL_459779 | EPI_ISL_487014 | EPI_ISL_459787 | EPI_ISL_405235 | EPI_ISL_428578 | EPI_ISL_398664 |
| EPI_ISL_480469 | EPI_ISL_470943 | EPI_ISL_459824 | EPI_ISL_405190 | EPI_ISL_428596 | EPI_ISL_401559 |
| EPI_ISL_428657 | EPI_ISL_459828 | EPI_ISL_480496 | EPI_ISL_405184 | EPI_ISL_459855 | EPI_ISL_401555 |
| EPI_ISL_459823 | EPI_ISL_459813 | EPI_ISL_400529 | EPI_ISL_399833 | EPI_ISL_401704 | EPI_ISL_405236 |
| EPI_ISL_459837 | EPI_ISL_428636 | EPI_ISL_398666 | EPI_ISL_399835 | EPI_ISL_470913 | EPI_ISL_428573 |
| EPI_ISL_459786 | EPI_ISL_428580 | EPI_ISL_405141 | EPI_ISL_408067 | EPI_ISL_480475 | EPI_ISL_408110 |
| EPI_ISL_428617 | EPI_ISL_408376 | EPI_ISL_408043 | EPI_ISL_428576 | EPI_ISL_480504 | EPI_ISL_399962 |
| EPI_ISL_416213 | EPI_ISL_408359 | EPI_ISL_408338 | EPI_ISL_400543 | EPI_ISL_459825 | EPI_ISL_407600 |
| EPI_ISL_428562 | EPI_ISL_408038 | EPI_ISL_459831 | EPI_ISL_405082 | EPI_ISL_479606 | EPI_ISL_480511 |
| EPI_ISL_408341 | EPI_ISL_407601 | EPI_ISL_480468 | EPI_ISL_405112 | EPI_ISL_459796 | EPI_ISL_470915 |
| EPI_ISL_405200 | EPI_ISL_405106 | EPI_ISL_459802 | EPI_ISL_405188 | EPI_ISL_459792 | EPI_ISL_480487 |
| EPI_ISL_405138 | EPI_ISL_401702 | EPI_ISL_459797 | EPI_ISL_408058 | EPI_ISL_400524 | EPI_ISL_487041 |
| EPI_ISL_408099 | EPI_ISL_401688 | EPI_ISL_459751 | EPI_ISL_408075 | EPI_ISL_405137 | EPI_ISL_487073 |
| EPI_ISL_416205 | EPI_ISL_400590 | EPI_ISL_459748 | EPI_ISL_408116 | EPI_ISL_413640 | EPI_ISL_471009 |
| EPI_ISL_428626 | EPI_ISL_405115 | EPI_ISL_459735 | EPI_ISL_408356 | EPI_ISL_480550 | EPI_ISL_418450 |
| EPI_ISL_428633 | EPI_ISL_459791 | EPI_ISL_459734 | EPI_ISL_428502 | EPI_ISL_408014 |                |
| EPI_ISL_471043 | EPI_ISL_416211 | EPI_ISL_408300 | EPI_ISL_428503 | EPI_ISL_399840 |                |
| EPI_ISL_487016 | EPI_ISL_459758 | EPI_ISL_408296 | EPI_ISL_428522 | EPI_ISL_405205 |                |

**Selected from USA (n=655)**

|                       |                |                       |                |                |                |
|-----------------------|----------------|-----------------------|----------------|----------------|----------------|
| <b>Season 2015-16</b> | EPI_ISL_201281 | EPI_ISL_253785        | EPI_ISL_259261 | EPI_ISL_259804 | EPI_ISL_289334 |
| EPI_ISL_234479        | EPI_ISL_212964 | EPI_ISL_225113        | EPI_ISL_253602 | EPI_ISL_264457 | EPI_ISL_287542 |
| EPI_ISL_202436        | EPI_ISL_202429 | EPI_ISL_224039        | EPI_ISL_286430 | EPI_ISL_286470 | EPI_ISL_287195 |
| EPI_ISL_237353        | EPI_ISL_202825 | EPI_ISL_223177        | EPI_ISL_247956 | EPI_ISL_277874 | EPI_ISL_268269 |
| EPI_ISL_237317        | EPI_ISL_205658 | EPI_ISL_222058        | EPI_ISL_259211 | EPI_ISL_282843 | EPI_ISL_239648 |
| EPI_ISL_237362        | EPI_ISL_207026 | EPI_ISL_224015        | EPI_ISL_286338 | EPI_ISL_287547 | EPI_ISL_272898 |
| EPI_ISL_240113        | EPI_ISL_211903 | EPI_ISL_219221        | EPI_ISL_286398 | EPI_ISL_260394 | EPI_ISL_272929 |
| EPI_ISL_230337        | EPI_ISL_202937 | EPI_ISL_219260        | EPI_ISL_286653 | EPI_ISL_287367 | EPI_ISL_256987 |
| EPI_ISL_224062        | EPI_ISL_201290 | EPI_ISL_220360        | EPI_ISL_286343 | EPI_ISL_241577 | EPI_ISL_240859 |
| EPI_ISL_225107        | EPI_ISL_202078 | EPI_ISL_224038        | EPI_ISL_286334 | EPI_ISL_287444 | EPI_ISL_259203 |
| EPI_ISL_202915        | EPI_ISL_202431 | EPI_ISL_219184        | EPI_ISL_249046 | EPI_ISL_286712 | EPI_ISL_239637 |
| EPI_ISL_240160        | EPI_ISL_203569 | EPI_ISL_232528        | EPI_ISL_244659 | EPI_ISL_287254 | EPI_ISL_239655 |
| EPI_ISL_238623        | EPI_ISL_202432 | EPI_ISL_223360        | EPI_ISL_239209 | EPI_ISL_250037 | EPI_ISL_240198 |
| EPI_ISL_212163        | EPI_ISL_203561 | EPI_ISL_224064        | EPI_ISL_284134 | EPI_ISL_266705 | EPI_ISL_239722 |
| EPI_ISL_207392        | EPI_ISL_203556 | EPI_ISL_235115        | EPI_ISL_286655 | EPI_ISL_263434 | EPI_ISL_240867 |
| EPI_ISL_211906        | EPI_ISL_220285 | EPI_ISL_238642        | EPI_ISL_256166 | EPI_ISL_258341 | EPI_ISL_259195 |
| EPI_ISL_202095        | EPI_ISL_205671 | <b>Season 2016-17</b> | EPI_ISL_266681 | EPI_ISL_256171 | EPI_ISL_289219 |
| EPI_ISL_222014        | EPI_ISL_202094 | EPI_ISL_294278        | EPI_ISL_261842 | EPI_ISL_239178 | EPI_ISL_289243 |
| EPI_ISL_202827        | EPI_ISL_202824 | EPI_ISL_329975        | EPI_ISL_293412 | EPI_ISL_287128 | EPI_ISL_289322 |
| EPI_ISL_207399        | EPI_ISL_237293 | EPI_ISL_253185        | EPI_ISL_242744 | EPI_ISL_287397 | EPI_ISL_252738 |
| EPI_ISL_230330        | EPI_ISL_232103 | EPI_ISL_252732        | EPI_ISL_287306 | EPI_ISL_327445 | EPI_ISL_241632 |
| EPI_ISL_214540        | EPI_ISL_242718 | EPI_ISL_286720        | EPI_ISL_287368 | EPI_ISL_253580 | EPI_ISL_239208 |
| EPI_ISL_222078        | EPI_ISL_232552 | EPI_ISL_258388        | EPI_ISL_257856 | EPI_ISL_259219 | EPI_ISL_286373 |
| EPI_ISL_213984        | EPI_ISL_223166 | EPI_ISL_286543        | EPI_ISL_286516 | EPI_ISL_238712 | EPI_ISL_256958 |
| EPI_ISL_212970        | EPI_ISL_225138 | EPI_ISL_286566        | EPI_ISL_277277 | EPI_ISL_287506 | EPI_ISL_253603 |
| EPI_ISL_225142        | EPI_ISL_219234 | EPI_ISL_286647        | EPI_ISL_248139 | EPI_ISL_287525 | EPI_ISL_237444 |
| EPI_ISL_219164        | EPI_ISL_207412 | EPI_ISL_286527        | EPI_ISL_286716 | EPI_ISL_239700 | EPI_ISL_239644 |
| EPI_ISL_219195        | EPI_ISL_224050 | EPI_ISL_286328        | EPI_ISL_240178 | EPI_ISL_289328 | EPI_ISL_240862 |
| EPI_ISL_208606        | EPI_ISL_226829 | EPI_ISL_286635        | EPI_ISL_284165 | EPI_ISL_275957 | EPI_ISL_240168 |
| EPI_ISL_225131        | EPI_ISL_244911 | EPI_ISL_286333        | EPI_ISL_257846 | EPI_ISL_256189 | EPI_ISL_237335 |

|                |                       |                |                |                       |                |
|----------------|-----------------------|----------------|----------------|-----------------------|----------------|
| EPI_ISL_287534 | EPI_ISL_286514        | EPI_ISL_320739 | EPI_ISL_360921 | EPI_ISL_361530        | EPI_ISL_360092 |
| EPI_ISL_239200 | EPI_ISL_287421        | EPI_ISL_306223 | EPI_ISL_361367 | EPI_ISL_300195        | EPI_ISL_366984 |
| EPI_ISL_239643 | EPI_ISL_258292        | EPI_ISL_289530 | EPI_ISL_373406 | EPI_ISL_312841        | EPI_ISL_339853 |
| EPI_ISL_239652 | EPI_ISL_270167        | EPI_ISL_308938 | EPI_ISL_376645 | EPI_ISL_320333        | EPI_ISL_346221 |
| EPI_ISL_241595 | EPI_ISL_248099        | EPI_ISL_284015 | EPI_ISL_314348 | EPI_ISL_305053        | EPI_ISL_346221 |
| EPI_ISL_286339 | EPI_ISL_293410        | EPI_ISL_300818 | EPI_ISL_320729 | EPI_ISL_300784        | EPI_ISL_336554 |
| EPI_ISL_283345 | EPI_ISL_327414        | EPI_ISL_298318 | EPI_ISL_296123 | EPI_ISL_303144        | EPI_ISL_346247 |
| EPI_ISL_281488 | EPI_ISL_288276        | EPI_ISL_360741 | EPI_ISL_360839 | EPI_ISL_286124        | EPI_ISL_358972 |
| EPI_ISL_256196 | EPI_ISL_255322        | EPI_ISL_315032 | EPI_ISL_287581 | EPI_ISL_290873        | EPI_ISL_363913 |
| EPI_ISL_286669 | EPI_ISL_259108        | EPI_ISL_360282 | EPI_ISL_360435 | EPI_ISL_287612        | EPI_ISL_366468 |
| EPI_ISL_248117 | EPI_ISL_238719        | EPI_ISL_361859 | EPI_ISL_360436 | EPI_ISL_286126        | EPI_ISL_335605 |
| EPI_ISL_248156 | EPI_ISL_241621        | EPI_ISL_308962 | EPI_ISL_284065 | EPI_ISL_287613        | EPI_ISL_335605 |
| EPI_ISL_255327 | EPI_ISL_286510        | EPI_ISL_306261 | EPI_ISL_289767 | EPI_ISL_287600        | EPI_ISL_336548 |
| EPI_ISL_240863 | EPI_ISL_287443        | EPI_ISL_295834 | EPI_ISL_360266 | <b>Season 2018-19</b> | EPI_ISL_353481 |
| EPI_ISL_258394 | EPI_ISL_241598        | EPI_ISL_361474 | EPI_ISL_295863 | EPI_ISL_380974        | EPI_ISL_366924 |
| EPI_ISL_259095 | EPI_ISL_266676        | EPI_ISL_361220 | EPI_ISL_288648 | EPI_ISL_380981        | EPI_ISL_370008 |
| EPI_ISL_248007 | <b>Season 2017-18</b> | EPI_ISL_361343 | EPI_ISL_360451 | EPI_ISL_380553        | EPI_ISL_353486 |
| EPI_ISL_287223 | EPI_ISL_329971        | EPI_ISL_373494 | EPI_ISL_298331 | EPI_ISL_366985        | EPI_ISL_359500 |
| EPI_ISL_287241 | EPI_ISL_360513        | EPI_ISL_376701 | EPI_ISL_360491 | EPI_ISL_501978        | EPI_ISL_365851 |
| EPI_ISL_262745 | EPI_ISL_287594        | EPI_ISL_361441 | EPI_ISL_360293 | EPI_ISL_349694        | EPI_ISL_380663 |
| EPI_ISL_266709 | EPI_ISL_288525        | EPI_ISL_360627 | EPI_ISL_312904 | EPI_ISL_357837        | EPI_ISL_380664 |
| EPI_ISL_270975 | EPI_ISL_289731        | EPI_ISL_358218 | EPI_ISL_299923 | EPI_ISL_380781        | EPI_ISL_387465 |
| EPI_ISL_287511 | EPI_ISL_305285        | EPI_ISL_319716 | EPI_ISL_358240 | EPI_ISL_368925        | EPI_ISL_354161 |
| EPI_ISL_289283 | EPI_ISL_314410        | EPI_ISL_312858 | EPI_ISL_298340 | EPI_ISL_360147        | EPI_ISL_356252 |
| EPI_ISL_264485 | EPI_ISL_376846        | EPI_ISL_309032 | EPI_ISL_284033 | EPI_ISL_380529        | EPI_ISL_362582 |
| EPI_ISL_281716 | EPI_ISL_303097        | EPI_ISL_303157 | EPI_ISL_361392 | EPI_ISL_366930        | EPI_ISL_380764 |
| EPI_ISL_239188 | EPI_ISL_319730        | EPI_ISL_330507 | EPI_ISL_361256 | EPI_ISL_369980        | EPI_ISL_370059 |
| EPI_ISL_287221 | EPI_ISL_306880        | EPI_ISL_331555 | EPI_ISL_361408 | EPI_ISL_347946        | EPI_ISL_359488 |
| EPI_ISL_286535 | EPI_ISL_373457        | EPI_ISL_358270 | EPI_ISL_361245 | EPI_ISL_349934        | EPI_ISL_349710 |
| EPI_ISL_275704 | EPI_ISL_361585        | EPI_ISL_300822 | EPI_ISL_360393 | EPI_ISL_351937        | EPI_ISL_339743 |
| EPI_ISL_272946 | EPI_ISL_305050        | EPI_ISL_376823 | EPI_ISL_300821 | EPI_ISL_358757        | EPI_ISL_363846 |
| EPI_ISL_282878 | EPI_ISL_312859        | EPI_ISL_327681 | EPI_ISL_298326 | EPI_ISL_362378        | EPI_ISL_351994 |
| EPI_ISL_277865 | EPI_ISL_299968        | EPI_ISL_361461 | EPI_ISL_287603 | EPI_ISL_362560        | EPI_ISL_359497 |
| EPI_ISL_281504 | EPI_ISL_305830        | EPI_ISL_360712 | EPI_ISL_288450 | EPI_ISL_360049        | EPI_ISL_348007 |
| EPI_ISL_286455 | EPI_ISL_307894        | EPI_ISL_360632 | EPI_ISL_289734 | EPI_ISL_360143        | EPI_ISL_501945 |
| EPI_ISL_273619 | EPI_ISL_360913        | EPI_ISL_360575 | EPI_ISL_298319 | EPI_ISL_372544        | EPI_ISL_359433 |
| EPI_ISL_266291 | EPI_ISL_330494        | EPI_ISL_312819 | EPI_ISL_289741 | EPI_ISL_334148        | EPI_ISL_349754 |
| EPI_ISL_240210 | EPI_ISL_284032        | EPI_ISL_309557 | EPI_ISL_360270 | EPI_ISL_349879        | EPI_ISL_370638 |
| EPI_ISL_247995 | EPI_ISL_360901        | EPI_ISL_303226 | EPI_ISL_299439 | EPI_ISL_358945        | EPI_ISL_336536 |
| EPI_ISL_257849 | EPI_ISL_316778        | EPI_ISL_295865 | EPI_ISL_299503 | EPI_ISL_359585        | EPI_ISL_368998 |
| EPI_ISL_256200 | EPI_ISL_288656        | EPI_ISL_290682 | EPI_ISL_304302 | EPI_ISL_366969        | EPI_ISL_344691 |
| EPI_ISL_287312 | EPI_ISL_313687        | EPI_ISL_327323 | EPI_ISL_284034 | EPI_ISL_368919        | EPI_ISL_351914 |
| EPI_ISL_266707 | EPI_ISL_366206        | EPI_ISL_360440 | EPI_ISL_288458 | EPI_ISL_369125        | EPI_ISL_353446 |
| EPI_ISL_258363 | EPI_ISL_331803        | EPI_ISL_320274 | EPI_ISL_303118 | EPI_ISL_372029        | EPI_ISL_353478 |
| EPI_ISL_239645 | EPI_ISL_305049        | EPI_ISL_360246 | EPI_ISL_298595 | EPI_ISL_372586        | EPI_ISL_354211 |
| EPI_ISL_249090 | EPI_ISL_320752        | EPI_ISL_360602 | EPI_ISL_298566 | EPI_ISL_344644        | EPI_ISL_354227 |
| EPI_ISL_256993 | EPI_ISL_361720        | EPI_ISL_360305 | EPI_ISL_296120 | EPI_ISL_359857        | EPI_ISL_359023 |
| EPI_ISL_241686 | EPI_ISL_376610        | EPI_ISL_286044 | EPI_ISL_285678 | EPI_ISL_359938        | EPI_ISL_380639 |
| EPI_ISL_258324 | EPI_ISL_306246        | EPI_ISL_296132 | EPI_ISL_292593 |                       |                |
| EPI_ISL_266701 | EPI_ISL_373491        | EPI_ISL_296150 | EPI_ISL_373454 |                       |                |
| EPI_ISL_240173 | EPI_ISL_361230        | EPI_ISL_298324 | EPI_ISL_286133 |                       |                |
| EPI_ISL_287255 | EPI_ISL_360608        | EPI_ISL_305032 | EPI_ISL_360420 |                       |                |
| EPI_ISL_250056 | EPI_ISL_305301        | EPI_ISL_305298 | EPI_ISL_376587 |                       |                |
| EPI_ISL_253615 | EPI_ISL_360291        | EPI_ISL_360879 | EPI_ISL_361331 |                       |                |

|                |                |                |                |                       |                |
|----------------|----------------|----------------|----------------|-----------------------|----------------|
| EPI_ISL_502004 | EPI_ISL_359027 | EPI_ISL_380450 | EPI_ISL_336744 | EPI_ISL_372599        | EPI_ISL_415774 |
| EPI_ISL_505746 | EPI_ISL_359414 | EPI_ISL_366449 | EPI_ISL_333762 | EPI_ISL_380614        | EPI_ISL_435325 |
| EPI_ISL_360073 | EPI_ISL_360152 | EPI_ISL_368999 | EPI_ISL_349721 | EPI_ISL_334102        | EPI_ISL_409121 |
| EPI_ISL_360137 | EPI_ISL_365848 | EPI_ISL_502037 | EPI_ISL_347919 | EPI_ISL_334103        | EPI_ISL_400025 |
| EPI_ISL_351909 | EPI_ISL_380985 | EPI_ISL_354203 | EPI_ISL_365841 | EPI_ISL_335613        | EPI_ISL_402743 |
| EPI_ISL_360030 | EPI_ISL_370137 | EPI_ISL_353667 | EPI_ISL_395148 | EPI_ISL_336687        | EPI_ISL_402758 |
| EPI_ISL_349948 | EPI_ISL_380843 | EPI_ISL_358858 | EPI_ISL_395433 | EPI_ISL_359987        | EPI_ISL_410760 |
| EPI_ISL_362636 | EPI_ISL_344626 | EPI_ISL_359031 | EPI_ISL_346216 | EPI_ISL_334140        | EPI_ISL_400836 |
| EPI_ISL_352055 | EPI_ISL_348158 | EPI_ISL_333741 | EPI_ISL_349937 | EPI_ISL_349914        | EPI_ISL_415762 |
| EPI_ISL_335608 | EPI_ISL_341042 | EPI_ISL_366463 | EPI_ISL_377938 | EPI_ISL_332551        | EPI_ISL_416775 |
| EPI_ISL_357898 | EPI_ISL_351956 | EPI_ISL_353680 | EPI_ISL_360148 | EPI_ISL_331410        | EPI_ISL_404760 |
| EPI_ISL_359284 | EPI_ISL_362417 | EPI_ISL_359901 | EPI_ISL_377886 | EPI_ISL_344665        | EPI_ISL_400873 |
| EPI_ISL_344623 | EPI_ISL_366819 | EPI_ISL_362635 | EPI_ISL_394926 | <b>Season 2019-20</b> | EPI_ISL_410758 |
| EPI_ISL_353707 | EPI_ISL_354122 | EPI_ISL_380882 | EPI_ISL_400777 | EPI_ISL_400881        | EPI_ISL_410738 |
| EPI_ISL_370087 | EPI_ISL_380415 | EPI_ISL_348176 | EPI_ISL_354128 | EPI_ISL_400994        | EPI_ISL_414116 |
| EPI_ISL_354219 | EPI_ISL_505739 | EPI_ISL_369126 | EPI_ISL_355751 | EPI_ISL_402445        | EPI_ISL_424755 |
| EPI_ISL_360142 | EPI_ISL_359892 | EPI_ISL_366713 | EPI_ISL_365821 | EPI_ISL_396999        | EPI_ISL_409048 |
| EPI_ISL_334146 | EPI_ISL_380409 | EPI_ISL_369894 | EPI_ISL_359558 | EPI_ISL_398548        | EPI_ISL_398829 |
| EPI_ISL_336515 | EPI_ISL_380736 | EPI_ISL_348233 | EPI_ISL_377888 | EPI_ISL_397195        | EPI_ISL_397228 |
| EPI_ISL_338594 | EPI_ISL_369099 | EPI_ISL_359029 | EPI_ISL_398835 | EPI_ISL_415687        | EPI_ISL_398800 |
| EPI_ISL_338597 | EPI_ISL_351948 | EPI_ISL_359922 | EPI_ISL_393791 | EPI_ISL_410752        | EPI_ISL_410733 |
| EPI_ISL_336564 | EPI_ISL_362641 | EPI_ISL_362349 | EPI_ISL_395408 | EPI_ISL_412157        | EPI_ISL_413261 |
| EPI_ISL_344705 | EPI_ISL_363835 | EPI_ISL_370018 | EPI_ISL_395427 | EPI_ISL_415771        | EPI_ISL_404543 |
| EPI_ISL_349913 | EPI_ISL_365985 | EPI_ISL_370203 | EPI_ISL_391368 | EPI_ISL_400817        | EPI_ISL_410755 |
| EPI_ISL_349946 | EPI_ISL_380783 | EPI_ISL_380549 | EPI_ISL_393775 | EPI_ISL_416788        | EPI_ISL_409385 |
| EPI_ISL_353635 | EPI_ISL_369039 | EPI_ISL_331864 | EPI_ISL_363856 | EPI_ISL_449732        |                |
| EPI_ISL_354174 | EPI_ISL_355723 | EPI_ISL_335612 | EPI_ISL_398955 | EPI_ISL_482891        |                |
| EPI_ISL_355575 | EPI_ISL_359152 | EPI_ISL_332558 | EPI_ISL_336484 | EPI_ISL_455806        |                |
| EPI_ISL_358934 | EPI_ISL_360088 | EPI_ISL_333750 | EPI_ISL_387496 | EPI_ISL_409391        |                |

### Selected from Ireland (n=112)

|                       |                       |                |                       |                |                       |
|-----------------------|-----------------------|----------------|-----------------------|----------------|-----------------------|
| <b>Season 2016-17</b> | EPI_ISL_267720        | EPI_ISL_308723 | <b>Season 2018-19</b> | EPI_ISL_393995 | EPI_ISL_344492        |
| EPI_ISL_267726        | EPI_ISL_267723        | EPI_ISL_321850 | EPI_ISL_344506        | EPI_ISL_344502 | EPI_ISL_344491        |
| EPI_ISL_267732        | EPI_ISL_256029        | EPI_ISL_321848 | EPI_ISL_393996        | EPI_ISL_344500 | <b>Season 2019-20</b> |
| EPI_ISL_267729        | EPI_ISL_267721        | EPI_ISL_299042 | EPI_ISL_394007        | EPI_ISL_356557 | EPI_ISL_406189        |
| EPI_ISL_267722        | EPI_ISL_256026        | EPI_ISL_299041 | EPI_ISL_394005        | EPI_ISL_394001 | EPI_ISL_406190        |
| EPI_ISL_267719        | EPI_ISL_267749        | EPI_ISL_299040 | EPI_ISL_393999        | EPI_ISL_394004 | EPI_ISL_403306        |
| EPI_ISL_256025        | <b>Season 2017-18</b> | EPI_ISL_299040 | EPI_ISL_394002        | EPI_ISL_344499 | EPI_ISL_407489        |
| EPI_ISL_267730        | EPI_ISL_329775        | EPI_ISL_297340 | EPI_ISL_356549        | EPI_ISL_344498 | EPI_ISL_426207        |
| EPI_ISL_267725        | EPI_ISL_300412        | EPI_ISL_297339 | EPI_ISL_394003        | EPI_ISL_337040 | EPI_ISL_409985        |
| EPI_ISL_267731        | EPI_ISL_321849        | EPI_ISL_308721 | EPI_ISL_389211        | EPI_ISL_337904 | EPI_ISL_403295        |
| EPI_ISL_256030        | EPI_ISL_329780        | EPI_ISL_329777 | EPI_ISL_344505        | EPI_ISL_337903 | EPI_ISL_403302        |
| EPI_ISL_267728        | EPI_ISL_329778        | EPI_ISL_308720 | EPI_ISL_344494        | EPI_ISL_336094 | EPI_ISL_406187        |
| EPI_ISL_267727        | EPI_ISL_329776        | EPI_ISL_299043 | EPI_ISL_336115        | EPI_ISL_336093 | EPI_ISL_406192        |
| EPI_ISL_267733        | EPI_ISL_329774        | EPI_ISL_308722 | EPI_ISL_337902        | EPI_ISL_394006 | EPI_ISL_426210        |
| EPI_ISL_267724        | EPI_ISL_329774        | EPI_ISL_308722 | EPI_ISL_336092        | EPI_ISL_356547 | EPI_ISL_426213        |
| EPI_ISL_256027        | EPI_ISL_321847        | EPI_ISL_329779 | EPI_ISL_393998        | EPI_ISL_344495 | EPI_ISL_426213        |
| EPI_ISL_256028        |                       |                | EPI_ISL_356550        | EPI_ISL_393997 |                       |

|                |                |                |                |                |                |
|----------------|----------------|----------------|----------------|----------------|----------------|
| EPI_ISL_426208 | EPI_ISL_403288 | EPI_ISL_426212 | EPI_ISL_403289 | EPI_ISL_426214 | EPI_ISL_426209 |
| EPI_ISL_406193 | EPI_ISL_527231 | EPI_ISL_403290 | EPI_ISL_403300 | EPI_ISL_403301 | EPI_ISL_406194 |
| EPI_ISL_403291 | EPI_ISL_407488 | EPI_ISL_403303 | EPI_ISL_407487 | EPI_ISL_426206 |                |
| EPI_ISL_406191 | EPI_ISL_403304 | EPI_ISL_426211 | EPI_ISL_407486 | EPI_ISL_406188 |                |

**Selected from Netherlands (n=800)**

|                       |                       |                |                       |                |                |
|-----------------------|-----------------------|----------------|-----------------------|----------------|----------------|
| <b>Season 2015-16</b> | EPI_ISL_247426        | EPI_ISL_309410 | EPI_ISL_309309        | EPI_ISL_343215 | EPI_ISL_336170 |
| EPI_ISL_355168        | EPI_ISL_242382        | EPI_ISL_305418 | EPI_ISL_301264        | EPI_ISL_343244 | EPI_ISL_343326 |
| EPI_ISL_230723        | EPI_ISL_249658        | EPI_ISL_316674 | EPI_ISL_305500        | EPI_ISL_354023 | EPI_ISL_343267 |
| EPI_ISL_230717        | EPI_ISL_241353        | EPI_ISL_305426 | EPI_ISL_309305        | EPI_ISL_351327 | EPI_ISL_339550 |
| EPI_ISL_216008        | EPI_ISL_240594        | EPI_ISL_309406 | EPI_ISL_293132        | EPI_ISL_355163 | EPI_ISL_339542 |
| EPI_ISL_216007        | EPI_ISL_253134        | EPI_ISL_309406 | EPI_ISL_293132        | EPI_ISL_355162 | EPI_ISL_342153 |
| EPI_ISL_233371        | EPI_ISL_241350        | EPI_ISL_305422 | EPI_ISL_309605        | EPI_ISL_339536 | EPI_ISL_334243 |
| <b>Season 2016-17</b> | EPI_ISL_253136        | EPI_ISL_304568 | EPI_ISL_306986        | EPI_ISL_345720 | EPI_ISL_340515 |
| EPI_ISL_255649        | EPI_ISL_241357        | EPI_ISL_305425 | EPI_ISL_334099        | EPI_ISL_347565 | EPI_ISL_337182 |
| EPI_ISL_316672        | EPI_ISL_253135        | EPI_ISL_305427 | EPI_ISL_348116        | EPI_ISL_350542 | EPI_ISL_343214 |
| EPI_ISL_253138        | EPI_ISL_249667        | EPI_ISL_309311 | EPI_ISL_336557        | EPI_ISL_347571 | EPI_ISL_339305 |
| EPI_ISL_255644        | EPI_ISL_241360        | EPI_ISL_309311 | EPI_ISL_336557        | EPI_ISL_340298 | EPI_ISL_337199 |
| EPI_ISL_247420        | EPI_ISL_241352        | EPI_ISL_302338 | EPI_ISL_305501        | EPI_ISL_340913 | EPI_ISL_370374 |
| EPI_ISL_270971        | EPI_ISL_242386        | EPI_ISL_305513 | EPI_ISL_302340        | EPI_ISL_339310 | EPI_ISL_370378 |
| EPI_ISL_355173        | EPI_ISL_255641        | EPI_ISL_301287 | EPI_ISL_306977        | EPI_ISL_347549 | EPI_ISL_356888 |
| EPI_ISL_241355        | EPI_ISL_253130        | EPI_ISL_309301 | EPI_ISL_305505        | EPI_ISL_347556 | EPI_ISL_350531 |
| EPI_ISL_253132        | EPI_ISL_241347        | EPI_ISL_309609 | EPI_ISL_302032        | EPI_ISL_347566 | EPI_ISL_355166 |
| EPI_ISL_241365        | EPI_ISL_240590        | EPI_ISL_306979 | EPI_ISL_309306        | EPI_ISL_347538 | EPI_ISL_355170 |
| EPI_ISL_259986        | EPI_ISL_253137        | EPI_ISL_306988 | EPI_ISL_309307        | EPI_ISL_343213 | EPI_ISL_350667 |
| EPI_ISL_247424        | EPI_ISL_241358        | EPI_ISL_306988 | EPI_ISL_309307        | EPI_ISL_351333 | EPI_ISL_351337 |
| EPI_ISL_241356        | EPI_ISL_242387        | EPI_ISL_309603 | EPI_ISL_309310        | EPI_ISL_354001 | EPI_ISL_354013 |
| EPI_ISL_259072        | EPI_ISL_249663        | EPI_ISL_291966 | EPI_ISL_293134        | EPI_ISL_355136 | EPI_ISL_351345 |
| EPI_ISL_240591        | EPI_ISL_241354        | EPI_ISL_305506 | EPI_ISL_293133        | EPI_ISL_356891 | EPI_ISL_356889 |
| EPI_ISL_291988        | EPI_ISL_240587        | EPI_ISL_309610 | EPI_ISL_305424        | EPI_ISL_340305 | EPI_ISL_356879 |
| EPI_ISL_241351        | EPI_ISL_291989        | EPI_ISL_305516 | EPI_ISL_309408        | EPI_ISL_345946 | EPI_ISL_343239 |
| EPI_ISL_253133        | EPI_ISL_291990        | EPI_ISL_305516 | EPI_ISL_309408        | EPI_ISL_342096 | EPI_ISL_343259 |
| EPI_ISL_249661        | EPI_ISL_241349        | EPI_ISL_305497 | EPI_ISL_309405        | EPI_ISL_335584 | EPI_ISL_340932 |
| EPI_ISL_241348        | EPI_ISL_249659        | EPI_ISL_305494 | EPI_ISL_291933        | EPI_ISL_339372 | EPI_ISL_356890 |
| EPI_ISL_240593        | EPI_ISL_255639        | EPI_ISL_305504 | EPI_ISL_291932        | EPI_ISL_349450 | EPI_ISL_354021 |
| EPI_ISL_270970        | EPI_ISL_249662        | EPI_ISL_305499 | EPI_ISL_305421        | EPI_ISL_352423 | EPI_ISL_354007 |
| EPI_ISL_258248        | EPI_ISL_247417        | EPI_ISL_309607 | EPI_ISL_316675        | EPI_ISL_342097 | EPI_ISL_349471 |
| EPI_ISL_255664        | EPI_ISL_241363        | EPI_ISL_309606 | EPI_ISL_305423        | EPI_ISL_343352 | EPI_ISL_350665 |
| EPI_ISL_308728        | <b>Season 2017-18</b> | EPI_ISL_309606 | <b>Season 2018-19</b> | EPI_ISL_336268 | EPI_ISL_355159 |
| EPI_ISL_293135        | EPI_ISL_309604        | EPI_ISL_309608 | EPI_ISL_355165        | EPI_ISL_350534 | EPI_ISL_351330 |
| EPI_ISL_242388        | EPI_ISL_309308        | EPI_ISL_301295 | EPI_ISL_339299        | EPI_ISL_337181 | EPI_ISL_342114 |
| EPI_ISL_240588        | EPI_ISL_301261        | EPI_ISL_293130 | EPI_ISL_340919        | EPI_ISL_340940 | EPI_ISL_347634 |
| EPI_ISL_253131        | EPI_ISL_305532        | EPI_ISL_301300 | EPI_ISL_352421        | EPI_ISL_343223 | EPI_ISL_339378 |
| EPI_ISL_241364        | EPI_ISL_309409        | EPI_ISL_305498 | EPI_ISL_342118        | EPI_ISL_355142 | EPI_ISL_344867 |
| EPI_ISL_241359        | EPI_ISL_309409        | EPI_ISL_291938 | EPI_ISL_351174        | EPI_ISL_334254 | EPI_ISL_342098 |
| EPI_ISL_240589        | EPI_ISL_305419        | EPI_ISL_291938 | EPI_ISL_351174        | EPI_ISL_336169 | EPI_ISL_349474 |
| EPI_ISL_247423        | EPI_ISL_309407        | EPI_ISL_305503 | EPI_ISL_347633        | EPI_ISL_336190 | EPI_ISL_345947 |
| EPI_ISL_253139        | EPI_ISL_291991        | EPI_ISL_301286 | EPI_ISL_347546        | EPI_ISL_336193 | EPI_ISL_340287 |
| EPI_ISL_241362        | EPI_ISL_309303        | EPI_ISL_304567 | EPI_ISL_342158        | EPI_ISL_336188 | EPI_ISL_339371 |
| EPI_ISL_247428        | EPI_ISL_309304        | EPI_ISL_304566 | EPI_ISL_355138        | EPI_ISL_343335 | EPI_ISL_349465 |
| EPI_ISL_247419        | EPI_ISL_293131        | EPI_ISL_305420 | EPI_ISL_347560        | EPI_ISL_339540 | EPI_ISL_350539 |
| EPI_ISL_316673        |                       |                | EPI_ISL_347580        | EPI_ISL_339523 | EPI_ISL_336197 |



|                |                |                |                |                |                       |
|----------------|----------------|----------------|----------------|----------------|-----------------------|
| EPI_ISL_345712 | EPI_ISL_342157 | EPI_ISL_340922 | EPI_ISL_340912 | EPI_ISL_350666 | EPI_ISL_354016        |
| EPI_ISL_347545 | EPI_ISL_395133 | EPI_ISL_339291 | EPI_ISL_339539 | EPI_ISL_342122 | EPI_ISL_351335        |
| EPI_ISL_347596 | EPI_ISL_351325 | EPI_ISL_340916 | EPI_ISL_340508 | EPI_ISL_334166 | EPI_ISL_343245        |
| EPI_ISL_351344 | EPI_ISL_347600 | EPI_ISL_347548 | EPI_ISL_339294 | EPI_ISL_337193 | EPI_ISL_347598        |
| EPI_ISL_350545 | EPI_ISL_340307 | EPI_ISL_354012 | EPI_ISL_342137 | EPI_ISL_339308 | EPI_ISL_342166        |
| EPI_ISL_347553 | EPI_ISL_351324 | EPI_ISL_345722 | EPI_ISL_339298 | EPI_ISL_340315 | EPI_ISL_342140        |
| EPI_ISL_347547 | EPI_ISL_350669 | EPI_ISL_339304 | EPI_ISL_356883 | EPI_ISL_340301 | EPI_ISL_342156        |
| EPI_ISL_347555 | EPI_ISL_351177 | EPI_ISL_342141 | EPI_ISL_356882 | EPI_ISL_345724 | EPI_ISL_339309        |
| EPI_ISL_347541 | EPI_ISL_351176 | EPI_ISL_337190 | EPI_ISL_347554 | EPI_ISL_350543 | EPI_ISL_343216        |
| EPI_ISL_347568 | EPI_ISL_342152 | EPI_ISL_343241 | EPI_ISL_336182 | EPI_ISL_335565 | EPI_ISL_356886        |
| EPI_ISL_347567 | EPI_ISL_355150 | EPI_ISL_343255 | EPI_ISL_343242 | EPI_ISL_354015 | EPI_ISL_342143        |
| EPI_ISL_345711 | EPI_ISL_355131 | EPI_ISL_347579 | EPI_ISL_344864 | EPI_ISL_345726 | EPI_ISL_343243        |
| EPI_ISL_345703 | EPI_ISL_343252 | EPI_ISL_343251 | EPI_ISL_344862 | EPI_ISL_354010 | EPI_ISL_343230        |
| EPI_ISL_345710 | EPI_ISL_340308 | EPI_ISL_336180 | EPI_ISL_343351 | EPI_ISL_347597 | EPI_ISL_345719        |
| EPI_ISL_345709 | EPI_ISL_344870 | EPI_ISL_340506 | EPI_ISL_343367 | EPI_ISL_336175 | EPI_ISL_356887        |
| EPI_ISL_354005 | EPI_ISL_349479 | EPI_ISL_340504 | EPI_ISL_343378 | EPI_ISL_340499 | EPI_ISL_355171        |
| EPI_ISL_350548 | EPI_ISL_344866 | EPI_ISL_340310 | EPI_ISL_339379 | EPI_ISL_336189 | EPI_ISL_355160        |
| EPI_ISL_350546 | EPI_ISL_339300 | EPI_ISL_355143 | EPI_ISL_349495 | EPI_ISL_335567 | EPI_ISL_337198        |
| EPI_ISL_350544 | EPI_ISL_354011 | EPI_ISL_340295 | EPI_ISL_339377 | EPI_ISL_334255 | EPI_ISL_343248        |
| EPI_ISL_347589 | EPI_ISL_355161 | EPI_ISL_339376 | EPI_ISL_342124 | EPI_ISL_347587 | EPI_ISL_343249        |
| EPI_ISL_347592 | EPI_ISL_347594 | EPI_ISL_345721 | EPI_ISL_342011 | EPI_ISL_343332 | EPI_ISL_354008        |
| EPI_ISL_342138 | EPI_ISL_355157 | EPI_ISL_340920 | EPI_ISL_335587 | EPI_ISL_347588 | EPI_ISL_351341        |
| EPI_ISL_355164 | EPI_ISL_355156 | EPI_ISL_340918 | EPI_ISL_335571 | EPI_ISL_356880 | EPI_ISL_343253        |
| EPI_ISL_340923 | EPI_ISL_355145 | EPI_ISL_340510 | EPI_ISL_340939 | EPI_ISL_343237 | EPI_ISL_351338        |
| EPI_ISL_347585 | EPI_ISL_343211 | EPI_ISL_343358 | EPI_ISL_355167 | EPI_ISL_355132 | EPI_ISL_342100        |
| EPI_ISL_347599 | EPI_ISL_355140 | EPI_ISL_345725 | EPI_ISL_351328 | EPI_ISL_354009 | EPI_ISL_335582        |
| EPI_ISL_354014 | EPI_ISL_355152 | EPI_ISL_342155 | EPI_ISL_342148 | EPI_ISL_351340 | EPI_ISL_334163        |
| EPI_ISL_354019 | EPI_ISL_355135 | EPI_ISL_342154 | EPI_ISL_339289 | EPI_ISL_337211 | EPI_ISL_345943        |
| EPI_ISL_356881 | EPI_ISL_355141 | EPI_ISL_336202 | EPI_ISL_335560 | EPI_ISL_340312 | <b>Season 2019-20</b> |
| EPI_ISL_356884 | EPI_ISL_349494 | EPI_ISL_340500 | EPI_ISL_340915 | EPI_ISL_340914 | EPI_ISL_415726        |
| EPI_ISL_342131 | EPI_ISL_349469 | EPI_ISL_335561 | EPI_ISL_343322 | EPI_ISL_349463 | EPI_ISL_401965        |
| EPI_ISL_336198 | EPI_ISL_343354 | EPI_ISL_335557 | EPI_ISL_336184 | EPI_ISL_351323 | EPI_ISL_416275        |
| EPI_ISL_340938 | EPI_ISL_342121 | EPI_ISL_342159 | EPI_ISL_345715 | EPI_ISL_354022 | EPI_ISL_421643        |
| EPI_ISL_336199 | EPI_ISL_340304 | EPI_ISL_339290 | EPI_ISL_345716 | EPI_ISL_342130 | EPI_ISL_412432        |
| EPI_ISL_347586 | EPI_ISL_395130 | EPI_ISL_340302 | EPI_ISL_340503 | EPI_ISL_350528 | EPI_ISL_406858        |
| EPI_ISL_356885 | EPI_ISL_331830 | EPI_ISL_340294 | EPI_ISL_337195 | EPI_ISL_335563 | EPI_ISL_414609        |
| EPI_ISL_342139 | EPI_ISL_355155 | EPI_ISL_347601 | EPI_ISL_343232 | EPI_ISL_335558 | EPI_ISL_416563        |
| EPI_ISL_342133 | EPI_ISL_355154 | EPI_ISL_340525 | EPI_ISL_339538 | EPI_ISL_336181 | EPI_ISL_400505        |
| EPI_ISL_334249 | EPI_ISL_342135 | EPI_ISL_343329 | EPI_ISL_339303 | EPI_ISL_339545 | EPI_ISL_415715        |
| EPI_ISL_351331 | EPI_ISL_339527 | EPI_ISL_343271 | EPI_ISL_340917 | EPI_ISL_345707 | EPI_ISL_415714        |
| EPI_ISL_351343 | EPI_ISL_337186 | EPI_ISL_336174 | EPI_ISL_343210 | EPI_ISL_354006 | EPI_ISL_415713        |
| EPI_ISL_354020 | EPI_ISL_347636 | EPI_ISL_355139 | EPI_ISL_343257 | EPI_ISL_355153 | EPI_ISL_408499        |
| EPI_ISL_335562 | EPI_ISL_340297 | EPI_ISL_342117 | EPI_ISL_342160 | EPI_ISL_355149 | EPI_ISL_401969        |
| EPI_ISL_337205 | EPI_ISL_342115 | EPI_ISL_340309 | EPI_ISL_334250 | EPI_ISL_355147 | EPI_ISL_413972        |
| EPI_ISL_343235 | EPI_ISL_342099 | EPI_ISL_339293 | EPI_ISL_340509 | EPI_ISL_342113 | EPI_ISL_413971        |
| EPI_ISL_351348 | EPI_ISL_336265 | EPI_ISL_336178 | EPI_ISL_351326 | EPI_ISL_343357 | EPI_ISL_411942        |
| EPI_ISL_347581 | EPI_ISL_350552 | EPI_ISL_342010 | EPI_ISL_340517 | EPI_ISL_345944 | EPI_ISL_402107        |
| EPI_ISL_354018 | EPI_ISL_347540 | EPI_ISL_335569 | EPI_ISL_340909 | EPI_ISL_342125 | EPI_ISL_403747        |
| EPI_ISL_342164 | EPI_ISL_347542 | EPI_ISL_347570 | EPI_ISL_355133 | EPI_ISL_352424 | EPI_ISL_416557        |
| EPI_ISL_340505 | EPI_ISL_345717 | EPI_ISL_340924 | EPI_ISL_337180 | EPI_ISL_343353 | EPI_ISL_413525        |
| EPI_ISL_337207 | EPI_ISL_343218 | EPI_ISL_339306 | EPI_ISL_350551 | EPI_ISL_342126 | EPI_ISL_411937        |
| EPI_ISL_337200 | EPI_ISL_337184 | EPI_ISL_331832 | EPI_ISL_347551 | EPI_ISL_340904 | EPI_ISL_413549        |
| EPI_ISL_336192 | EPI_ISL_350529 | EPI_ISL_334245 | EPI_ISL_351172 | EPI_ISL_350550 | EPI_ISL_414604        |
| EPI_ISL_342162 | EPI_ISL_354024 | EPI_ISL_334164 | EPI_ISL_350668 | EPI_ISL_343247 | EPI_ISL_414602        |

|                |                |                |                |                |                |
|----------------|----------------|----------------|----------------|----------------|----------------|
| EPI_ISL_402106 | EPI_ISL_404140 | EPI_ISL_410400 | EPI_ISL_403754 | EPI_ISL_410388 | EPI_ISL_408491 |
| EPI_ISL_410008 | EPI_ISL_404137 | EPI_ISL_412427 | EPI_ISL_403755 | EPI_ISL_401980 | EPI_ISL_414607 |
| EPI_ISL_410011 | EPI_ISL_402114 | EPI_ISL_412440 | EPI_ISL_403756 | EPI_ISL_408502 | EPI_ISL_408510 |
| EPI_ISL_416280 | EPI_ISL_402105 | EPI_ISL_412453 | EPI_ISL_404143 | EPI_ISL_403758 | EPI_ISL_403760 |
| EPI_ISL_416279 | EPI_ISL_402104 | EPI_ISL_415712 | EPI_ISL_408492 | EPI_ISL_403757 | EPI_ISL_401978 |
| EPI_ISL_416281 | EPI_ISL_402103 | EPI_ISL_415725 | EPI_ISL_408508 | EPI_ISL_415732 | EPI_ISL_415738 |
| EPI_ISL_416282 | EPI_ISL_408393 | EPI_ISL_415716 | EPI_ISL_406882 | EPI_ISL_408392 | EPI_ISL_408396 |
| EPI_ISL_400507 | EPI_ISL_406853 | EPI_ISL_415727 | EPI_ISL_403753 | EPI_ISL_406847 | EPI_ISL_408391 |
| EPI_ISL_405407 | EPI_ISL_416273 | EPI_ISL_415728 | EPI_ISL_410396 | EPI_ISL_416277 | EPI_ISL_401981 |
| EPI_ISL_413533 | EPI_ISL_416560 | EPI_ISL_415729 | EPI_ISL_412442 | EPI_ISL_395172 | EPI_ISL_410383 |
| EPI_ISL_421646 | EPI_ISL_415717 | EPI_ISL_415730 | EPI_ISL_406869 | EPI_ISL_416552 | EPI_ISL_410395 |
| EPI_ISL_403761 | EPI_ISL_416548 | EPI_ISL_401983 | EPI_ISL_406881 | EPI_ISL_413537 | EPI_ISL_412449 |
| EPI_ISL_400587 | EPI_ISL_405396 | EPI_ISL_415731 | EPI_ISL_406884 | EPI_ISL_411947 | EPI_ISL_413969 |
| EPI_ISL_400290 | EPI_ISL_406848 | EPI_ISL_415721 | EPI_ISL_408387 | EPI_ISL_411940 | EPI_ISL_412431 |
| EPI_ISL_421650 | EPI_ISL_412430 | EPI_ISL_401975 | EPI_ISL_408397 | EPI_ISL_404145 | EPI_ISL_413962 |
| EPI_ISL_413532 | EPI_ISL_401974 | EPI_ISL_412446 | EPI_ISL_410067 | EPI_ISL_405720 | EPI_ISL_410077 |
| EPI_ISL_408507 | EPI_ISL_410064 | EPI_ISL_401970 | EPI_ISL_410085 | EPI_ISL_416551 | EPI_ISL_410074 |
| EPI_ISL_400508 | EPI_ISL_413547 | EPI_ISL_403759 | EPI_ISL_408395 | EPI_ISL_410381 | EPI_ISL_412457 |
| EPI_ISL_400506 | EPI_ISL_413535 | EPI_ISL_403764 | EPI_ISL_408390 | EPI_ISL_410397 | EPI_ISL_412429 |
| EPI_ISL_415734 | EPI_ISL_413540 | EPI_ISL_405402 | EPI_ISL_406888 | EPI_ISL_410072 | EPI_ISL_405400 |
| EPI_ISL_400588 | EPI_ISL_401973 | EPI_ISL_416554 | EPI_ISL_406879 | EPI_ISL_413964 | EPI_ISL_406889 |
| EPI_ISL_402110 | EPI_ISL_403750 | EPI_ISL_406851 | EPI_ISL_406873 | EPI_ISL_413959 | EPI_ISL_415719 |
| EPI_ISL_405723 | EPI_ISL_403762 | EPI_ISL_406856 | EPI_ISL_406870 | EPI_ISL_412452 | EPI_ISL_413957 |
| EPI_ISL_407060 | EPI_ISL_415722 | EPI_ISL_406878 | EPI_ISL_401972 | EPI_ISL_410384 | EPI_ISL_410010 |
| EPI_ISL_411943 | EPI_ISL_415723 | EPI_ISL_406872 | EPI_ISL_412438 | EPI_ISL_403763 | EPI_ISL_397929 |
| EPI_ISL_413541 | EPI_ISL_405722 | EPI_ISL_406855 | EPI_ISL_412428 | EPI_ISL_406846 | EPI_ISL_407065 |
| EPI_ISL_400586 | EPI_ISL_416556 | EPI_ISL_406852 | EPI_ISL_410393 | EPI_ISL_408389 | EPI_ISL_411941 |
| EPI_ISL_421647 | EPI_ISL_406883 | EPI_ISL_405403 | EPI_ISL_406890 | EPI_ISL_406877 | EPI_ISL_402109 |
| EPI_ISL_411939 | EPI_ISL_408386 | EPI_ISL_405392 | EPI_ISL_398158 | EPI_ISL_406857 | EPI_ISL_410385 |
| EPI_ISL_411948 | EPI_ISL_410093 | EPI_ISL_403766 | EPI_ISL_416278 | EPI_ISL_415718 | EPI_ISL_405401 |
| EPI_ISL_411946 | EPI_ISL_413966 | EPI_ISL_403749 | EPI_ISL_398159 | EPI_ISL_405393 | EPI_ISL_410069 |
| EPI_ISL_408509 | EPI_ISL_413967 | EPI_ISL_413963 | EPI_ISL_412439 | EPI_ISL_402108 | EPI_ISL_401977 |
| EPI_ISL_408503 | EPI_ISL_405395 | EPI_ISL_410082 | EPI_ISL_406859 | EPI_ISL_410009 | EPI_ISL_408388 |
| EPI_ISL_408496 | EPI_ISL_410061 | EPI_ISL_413960 | EPI_ISL_401966 | EPI_ISL_412441 | EPI_ISL_412456 |
| EPI_ISL_408495 | EPI_ISL_410387 | EPI_ISL_401971 | EPI_ISL_405397 | EPI_ISL_410386 |                |
| EPI_ISL_407062 | EPI_ISL_410390 | EPI_ISL_403748 | EPI_ISL_401967 | EPI_ISL_405399 |                |
| EPI_ISL_405719 | EPI_ISL_410391 | EPI_ISL_403752 | EPI_ISL_404141 | EPI_ISL_405718 |                |

**Selected from Sweden (n=590)**

| <b>Season 2015-16</b> |                |                |                | <b>Season 2016-17</b> |                |
|-----------------------|----------------|----------------|----------------|-----------------------|----------------|
| EPI_ISL_215753        | EPI_ISL_205767 | EPI_ISL_215741 | EPI_ISL_215738 | EPI_ISL_241921        | EPI_ISL_239538 |
| EPI_ISL_205784        | EPI_ISL_205771 | EPI_ISL_205790 | EPI_ISL_215721 | EPI_ISL_241929        | EPI_ISL_239547 |
| EPI_ISL_215720        | EPI_ISL_205774 | EPI_ISL_205782 | EPI_ISL_220477 | EPI_ISL_253865        | EPI_ISL_239539 |
| EPI_ISL_231826        | EPI_ISL_205826 | EPI_ISL_208206 | EPI_ISL_220479 | EPI_ISL_234033        | EPI_ISL_258913 |
| EPI_ISL_215719        | EPI_ISL_206414 | EPI_ISL_220465 | EPI_ISL_220435 | EPI_ISL_261945        | EPI_ISL_258826 |
| EPI_ISL_231827        | EPI_ISL_208207 | EPI_ISL_226094 | EPI_ISL_220458 | EPI_ISL_258813        | EPI_ISL_245011 |
| EPI_ISL_220452        | EPI_ISL_205770 | EPI_ISL_220472 | EPI_ISL_205783 | EPI_ISL_257398        | EPI_ISL_248876 |
| EPI_ISL_220454        | EPI_ISL_201101 | EPI_ISL_226095 | EPI_ISL_220449 | EPI_ISL_253958        | EPI_ISL_241935 |
| EPI_ISL_208205        | EPI_ISL_201103 | EPI_ISL_220457 | EPI_ISL_226093 | EPI_ISL_253148        | EPI_ISL_241920 |
| EPI_ISL_208204        | EPI_ISL_234034 | EPI_ISL_233407 | EPI_ISL_202344 | EPI_ISL_253146        | EPI_ISL_239529 |
| EPI_ISL_205778        | EPI_ISL_220447 | EPI_ISL_205781 | EPI_ISL_213095 | EPI_ISL_241907        | EPI_ISL_239530 |
| EPI_ISL_205772        | EPI_ISL_220450 | EPI_ISL_233408 | EPI_ISL_199503 | EPI_ISL_239537        | EPI_ISL_241899 |
| EPI_ISL_205766        | EPI_ISL_226092 | EPI_ISL_220448 | EPI_ISL_201102 | EPI_ISL_241914        | EPI_ISL_241900 |
|                       | EPI_ISL_215718 | EPI_ISL_215722 | EPI_ISL_201100 |                       | EPI_ISL_241902 |

|                |                |                |                       |                |                       |
|----------------|----------------|----------------|-----------------------|----------------|-----------------------|
| EPI_ISL_245009 | EPI_ISL_253891 | EPI_ISL_237515 | EPI_ISL_241934        | EPI_ISL_282969 | EPI_ISL_285976        |
| EPI_ISL_245013 | EPI_ISL_253917 | EPI_ISL_237516 | EPI_ISL_261689        | EPI_ISL_282974 | EPI_ISL_285979        |
| EPI_ISL_245014 | EPI_ISL_258809 | EPI_ISL_241912 | EPI_ISL_274117        | EPI_ISL_310247 | EPI_ISL_310243        |
| EPI_ISL_245016 | EPI_ISL_258817 | EPI_ISL_258927 | EPI_ISL_285506        | EPI_ISL_282971 | EPI_ISL_307083        |
| EPI_ISL_248875 | EPI_ISL_258820 | EPI_ISL_258804 | EPI_ISL_263021        | EPI_ISL_302173 | EPI_ISL_307079        |
| EPI_ISL_258811 | EPI_ISL_261639 | EPI_ISL_237508 | EPI_ISL_239535        | EPI_ISL_314665 | EPI_ISL_292065        |
| EPI_ISL_258814 | EPI_ISL_261650 | EPI_ISL_237512 | EPI_ISL_239548        | EPI_ISL_302283 | EPI_ISL_292057        |
| EPI_ISL_258818 | EPI_ISL_261653 | EPI_ISL_239532 | EPI_ISL_241915        | EPI_ISL_314683 | EPI_ISL_291379        |
| EPI_ISL_239546 | EPI_ISL_261932 | EPI_ISL_263032 | EPI_ISL_253149        | EPI_ISL_310262 | EPI_ISL_291376        |
| EPI_ISL_239549 | EPI_ISL_261941 | EPI_ISL_261654 | EPI_ISL_253869        | EPI_ISL_310245 | EPI_ISL_282985        |
| EPI_ISL_241911 | EPI_ISL_274121 | EPI_ISL_261940 | EPI_ISL_241926        | EPI_ISL_310255 | EPI_ISL_282977        |
| EPI_ISL_258911 | EPI_ISL_241930 | EPI_ISL_258832 | EPI_ISL_281576        | EPI_ISL_314684 | EPI_ISL_292918        |
| EPI_ISL_263022 | EPI_ISL_274123 | EPI_ISL_258835 | EPI_ISL_292920        | EPI_ISL_282973 | EPI_ISL_285991        |
| EPI_ISL_261667 | EPI_ISL_258918 | EPI_ISL_253859 | EPI_ISL_241924        | EPI_ISL_302286 | EPI_ISL_285992        |
| EPI_ISL_258920 | EPI_ISL_245023 | EPI_ISL_245017 | EPI_ISL_241925        | EPI_ISL_302184 | EPI_ISL_285993        |
| EPI_ISL_261942 | EPI_ISL_241905 | EPI_ISL_241931 | EPI_ISL_241933        | EPI_ISL_292922 | EPI_ISL_289495        |
| EPI_ISL_258929 | EPI_ISL_245008 | EPI_ISL_253879 | EPI_ISL_241932        | EPI_ISL_285973 | EPI_ISL_291373        |
| EPI_ISL_261644 | EPI_ISL_245010 | EPI_ISL_261662 | EPI_ISL_258915        | EPI_ISL_285980 | EPI_ISL_292900        |
| EPI_ISL_274105 | EPI_ISL_248874 | EPI_ISL_258833 | EPI_ISL_258917        | EPI_ISL_285988 | EPI_ISL_292901        |
| EPI_ISL_263028 | EPI_ISL_257402 | EPI_ISL_253956 | EPI_ISL_253868        | EPI_ISL_291397 | EPI_ISL_292902        |
| EPI_ISL_258925 | EPI_ISL_245007 | EPI_ISL_253147 | EPI_ISL_258921        | EPI_ISL_291398 | EPI_ISL_297352        |
| EPI_ISL_261646 | EPI_ISL_245012 | EPI_ISL_239542 | EPI_ISL_253880        | EPI_ISL_291399 | EPI_ISL_302181        |
| EPI_ISL_258805 | EPI_ISL_248873 | EPI_ISL_253873 | EPI_ISL_239555        | EPI_ISL_292036 | EPI_ISL_302287        |
| EPI_ISL_261663 | EPI_ISL_248877 | EPI_ISL_253898 | EPI_ISL_241936        | EPI_ISL_292071 | EPI_ISL_310250        |
| EPI_ISL_263029 | EPI_ISL_253953 | EPI_ISL_253870 | EPI_ISL_245006        | EPI_ISL_292046 | EPI_ISL_302269        |
| EPI_ISL_261939 | EPI_ISL_258828 | EPI_ISL_274122 | EPI_ISL_257401        | EPI_ISL_292047 | EPI_ISL_310261        |
| EPI_ISL_253895 | EPI_ISL_281230 | EPI_ISL_274118 | EPI_ISL_258822        | EPI_ISL_307088 | EPI_ISL_307090        |
| EPI_ISL_261690 | EPI_ISL_245025 | EPI_ISL_274120 | EPI_ISL_241909        | EPI_ISL_307089 | EPI_ISL_310260        |
| EPI_ISL_258919 | EPI_ISL_253858 | EPI_ISL_253150 | EPI_ISL_253892        | EPI_ISL_310244 | EPI_ISL_310254        |
| EPI_ISL_245005 | EPI_ISL_253861 | EPI_ISL_241923 | EPI_ISL_245018        | EPI_ISL_310252 | EPI_ISL_310249        |
| EPI_ISL_248872 | EPI_ISL_261944 | EPI_ISL_241916 | EPI_ISL_258806        | EPI_ISL_310253 | EPI_ISL_307072        |
| EPI_ISL_241940 | EPI_ISL_261656 | EPI_ISL_241908 | EPI_ISL_261688        | EPI_ISL_310263 | EPI_ISL_307084        |
| EPI_ISL_263026 | EPI_ISL_274106 | EPI_ISL_241906 | <b>Season 2017-18</b> | EPI_ISL_282976 | EPI_ISL_307092        |
| EPI_ISL_261661 | EPI_ISL_258926 | EPI_ISL_235390 | EPI_ISL_307077        | EPI_ISL_282982 | EPI_ISL_310256        |
| EPI_ISL_261642 | EPI_ISL_258834 | EPI_ISL_241904 | EPI_ISL_307078        | EPI_ISL_282983 | EPI_ISL_285989        |
| EPI_ISL_261637 | EPI_ISL_258928 | EPI_ISL_241922 | EPI_ISL_310242        | EPI_ISL_282975 | EPI_ISL_285990        |
| EPI_ISL_274116 | EPI_ISL_258819 | EPI_ISL_241927 | EPI_ISL_314682        | EPI_ISL_285981 | EPI_ISL_314659        |
| EPI_ISL_258922 | EPI_ISL_258816 | EPI_ISL_241937 | EPI_ISL_291392        | EPI_ISL_307091 | EPI_ISL_281232        |
| EPI_ISL_258831 | EPI_ISL_253889 | EPI_ISL_245019 | EPI_ISL_282981        | EPI_ISL_282984 | EPI_ISL_282970        |
| EPI_ISL_258812 | EPI_ISL_253894 | EPI_ISL_245020 | EPI_ISL_292924        | EPI_ISL_285982 | EPI_ISL_285986        |
| EPI_ISL_253888 | EPI_ISL_261648 | EPI_ISL_253863 | EPI_ISL_307080        | EPI_ISL_291374 | EPI_ISL_292923        |
| EPI_ISL_245021 | EPI_ISL_258923 | EPI_ISL_253882 | EPI_ISL_285972        | EPI_ISL_310246 | <b>Season 2018-19</b> |
| EPI_ISL_274119 | EPI_ISL_261640 | EPI_ISL_253890 | EPI_ISL_292921        | EPI_ISL_314681 | EPI_ISL_334183        |
| EPI_ISL_241939 | EPI_ISL_241938 | EPI_ISL_253952 | EPI_ISL_292040        | EPI_ISL_302175 | EPI_ISL_334184        |
| EPI_ISL_241901 | EPI_ISL_253881 | EPI_ISL_253957 | EPI_ISL_285970        | EPI_ISL_310248 | EPI_ISL_338772        |
| EPI_ISL_241903 | EPI_ISL_258825 | EPI_ISL_261658 | EPI_ISL_302182        | EPI_ISL_302171 | EPI_ISL_338773        |
| EPI_ISL_241910 | EPI_ISL_253884 | EPI_ISL_274107 | EPI_ISL_307087        | EPI_ISL_302289 | EPI_ISL_338773        |
| EPI_ISL_241919 | EPI_ISL_239545 | EPI_ISL_239543 | EPI_ISL_302180        | EPI_ISL_302172 | EPI_ISL_343371        |
| EPI_ISL_241928 | EPI_ISL_258912 | EPI_ISL_239540 | EPI_ISL_302267        | EPI_ISL_314685 | EPI_ISL_355226        |
| EPI_ISL_241941 | EPI_ISL_241913 | EPI_ISL_241917 | EPI_ISL_307073        | EPI_ISL_314058 | EPI_ISL_367772        |
| EPI_ISL_245015 | EPI_ISL_258821 | EPI_ISL_257399 | EPI_ISL_281231        | EPI_ISL_302277 | EPI_ISL_343372        |
| EPI_ISL_245022 | EPI_ISL_241918 | EPI_ISL_239534 | EPI_ISL_310259        | EPI_ISL_302170 | EPI_ISL_334187        |
| EPI_ISL_253860 | EPI_ISL_253118 | EPI_ISL_258830 | EPI_ISL_282972        | EPI_ISL_314663 | EPI_ISL_334187        |
| EPI_ISL_253883 | EPI_ISL_237514 | EPI_ISL_242304 | EPI_ISL_281229        | EPI_ISL_292906 | EPI_ISL_334198        |

|                |                |                |                       |                |                |
|----------------|----------------|----------------|-----------------------|----------------|----------------|
| EPI_ISL_343373 | EPI_ISL_343381 | EPI_ISL_336166 | EPI_ISL_334210        | EPI_ISL_447885 | EPI_ISL_426368 |
| EPI_ISL_355220 | EPI_ISL_347802 | EPI_ISL_347795 | EPI_ISL_334211        | EPI_ISL_403231 | EPI_ISL_413673 |
| EPI_ISL_340377 | EPI_ISL_347812 | EPI_ISL_347799 | EPI_ISL_334207        | EPI_ISL_412388 | EPI_ISL_447873 |
| EPI_ISL_334205 | EPI_ISL_355218 | EPI_ISL_355229 | EPI_ISL_355225        | EPI_ISL_404212 | EPI_ISL_404256 |
| EPI_ISL_336165 | EPI_ISL_355235 | EPI_ISL_356859 | EPI_ISL_329741        | EPI_ISL_404213 | EPI_ISL_404219 |
| EPI_ISL_356841 | EPI_ISL_355239 | EPI_ISL_356860 | EPI_ISL_343377        | EPI_ISL_398735 | EPI_ISL_398730 |
| EPI_ISL_334191 | EPI_ISL_356839 | EPI_ISL_356861 | <b>Season 2019-20</b> | EPI_ISL_406324 | EPI_ISL_398737 |
| EPI_ISL_334193 | EPI_ISL_355240 | EPI_ISL_356865 | EPI_ISL_447874        | EPI_ISL_398736 | EPI_ISL_398733 |
| EPI_ISL_340384 | EPI_ISL_356851 | EPI_ISL_356866 | EPI_ISL_447883        | EPI_ISL_403225 | EPI_ISL_398734 |
| EPI_ISL_355217 | EPI_ISL_367754 | EPI_ISL_355231 | EPI_ISL_426367        | EPI_ISL_426369 | EPI_ISL_399975 |
| EPI_ISL_334194 | EPI_ISL_356843 | EPI_ISL_356848 | EPI_ISL_420886        | EPI_ISL_398738 | EPI_ISL_404214 |
| EPI_ISL_336147 | EPI_ISL_355238 | EPI_ISL_340376 | EPI_ISL_420886        | EPI_ISL_404262 | EPI_ISL_404218 |
| EPI_ISL_338755 | EPI_ISL_335523 | EPI_ISL_336154 | EPI_ISL_485779        | EPI_ISL_412399 | EPI_ISL_447872 |
| EPI_ISL_334209 | EPI_ISL_336152 | EPI_ISL_340278 | EPI_ISL_412403        | EPI_ISL_412400 | EPI_ISL_412394 |
| EPI_ISL_391067 | EPI_ISL_356858 | EPI_ISL_343370 | EPI_ISL_426376        | EPI_ISL_412401 | EPI_ISL_426370 |
| EPI_ISL_355224 | EPI_ISL_356856 | EPI_ISL_343380 | EPI_ISL_426377        | EPI_ISL_447870 | EPI_ISL_396433 |
| EPI_ISL_347810 | EPI_ISL_356855 | EPI_ISL_356840 | EPI_ISL_404258        | EPI_ISL_426373 | EPI_ISL_406322 |
| EPI_ISL_355237 | EPI_ISL_356857 | EPI_ISL_355236 | EPI_ISL_404277        | EPI_ISL_413685 | EPI_ISL_413689 |
| EPI_ISL_356854 | EPI_ISL_356844 | EPI_ISL_356838 | EPI_ISL_404271        | EPI_ISL_426374 | EPI_ISL_413688 |
| EPI_ISL_347806 | EPI_ISL_355234 | EPI_ISL_343376 | EPI_ISL_447879        | EPI_ISL_447871 | EPI_ISL_404268 |
| EPI_ISL_356863 | EPI_ISL_355221 | EPI_ISL_367810 | EPI_ISL_426372        | EPI_ISL_477528 | EPI_ISL_413681 |
| EPI_ISL_356864 | EPI_ISL_334368 | EPI_ISL_355228 | EPI_ISL_426375        | EPI_ISL_485749 | EPI_ISL_403224 |
| EPI_ISL_347815 | EPI_ISL_343375 | EPI_ISL_355227 | EPI_ISL_447877        | EPI_ISL_447882 | EPI_ISL_396436 |
| EPI_ISL_355241 | EPI_ISL_355223 | EPI_ISL_332334 | EPI_ISL_447869        | EPI_ISL_398732 | EPI_ISL_395317 |
| EPI_ISL_347816 | EPI_ISL_355232 | EPI_ISL_355233 | EPI_ISL_447868        | EPI_ISL_413661 | EPI_ISL_396435 |
| EPI_ISL_356862 | EPI_ISL_347814 | EPI_ISL_356849 | EPI_ISL_447867        | EPI_ISL_447881 | EPI_ISL_406323 |
| EPI_ISL_367773 | EPI_ISL_334186 | EPI_ISL_334192 | EPI_ISL_413667        | EPI_ISL_404211 | EPI_ISL_413665 |
| EPI_ISL_356850 | EPI_ISL_338777 | EPI_ISL_343368 | EPI_ISL_413668        | EPI_ISL_447876 | EPI_ISL_485776 |
| EPI_ISL_340378 | EPI_ISL_347807 | EPI_ISL_334180 | EPI_ISL_420883        | EPI_ISL_447878 | EPI_ISL_413682 |
| EPI_ISL_343374 | EPI_ISL_335541 | EPI_ISL_334182 | EPI_ISL_477611        | EPI_ISL_426366 | EPI_ISL_413654 |
|                |                |                | EPI_ISL_485777        | EPI_ISL_413686 |                |
|                |                |                | EPI_ISL_391079        | EPI_ISL_477529 |                |
|                |                |                | EPI_ISL_398731        | EPI_ISL_485750 |                |
|                |                |                | EPI_ISL_404261        | EPI_ISL_396431 |                |
|                |                |                | EPI_ISL_404276        | EPI_ISL_406320 |                |

### Selected from Russia (n=1041)

|                       |                       |                |                |                |                |
|-----------------------|-----------------------|----------------|----------------|----------------|----------------|
| <b>Season 2015-16</b> | EPI_ISL_232497        | EPI_ISL_249007 | EPI_ISL_273705 | EPI_ISL_256084 | EPI_ISL_273660 |
| EPI_ISL_232498        | EPI_ISL_232499        | EPI_ISL_252570 | EPI_ISL_273668 | EPI_ISL_256062 | EPI_ISL_273661 |
| EPI_ISL_224574        | EPI_ISL_232500        | EPI_ISL_242624 | EPI_ISL_274562 | EPI_ISL_256063 | EPI_ISL_249010 |
| EPI_ISL_231824        | EPI_ISL_230360        | EPI_ISL_242664 | EPI_ISL_259690 | EPI_ISL_280471 | EPI_ISL_249011 |
| EPI_ISL_209097        | EPI_ISL_226097        | EPI_ISL_248438 | EPI_ISL_256077 | EPI_ISL_280471 | EPI_ISL_256807 |
| EPI_ISL_230313        | EPI_ISL_230361        | EPI_ISL_252574 | EPI_ISL_259688 | EPI_ISL_273653 | EPI_ISL_257323 |
| EPI_ISL_205852        | <b>Season 2016-17</b> | EPI_ISL_256422 | EPI_ISL_259689 | EPI_ISL_277518 | EPI_ISL_273659 |
| EPI_ISL_209098        | EPI_ISL_256425        | EPI_ISL_273654 | EPI_ISL_261861 | EPI_ISL_273680 | EPI_ISL_242636 |
| EPI_ISL_226099        | EPI_ISL_256418        | EPI_ISL_274561 | EPI_ISL_256404 | EPI_ISL_259686 | EPI_ISL_242645 |
| EPI_ISL_226098        | EPI_ISL_256085        | EPI_ISL_277519 | EPI_ISL_249067 | EPI_ISL_256815 | EPI_ISL_249009 |
| EPI_ISL_209092        | EPI_ISL_273678        | EPI_ISL_280470 | EPI_ISL_259123 | EPI_ISL_256814 | EPI_ISL_253194 |
| EPI_ISL_232501        | EPI_ISL_256134        | EPI_ISL_257319 | EPI_ISL_242643 | EPI_ISL_256424 | EPI_ISL_253208 |
| EPI_ISL_230362        | EPI_ISL_256809        | EPI_ISL_276910 | EPI_ISL_242654 | EPI_ISL_276316 | EPI_ISL_255922 |
| EPI_ISL_230359        | EPI_ISL_242612        | EPI_ISL_276308 | EPI_ISL_302522 | EPI_ISL_276315 | EPI_ISL_256066 |
| EPI_ISL_230363        | EPI_ISL_242611        | EPI_ISL_274563 | EPI_ISL_276303 | EPI_ISL_256072 | EPI_ISL_256067 |
| EPI_ISL_231825        | EPI_ISL_242609        | EPI_ISL_256411 | EPI_ISL_256086 | EPI_ISL_256064 | EPI_ISL_256073 |

|                |                |                |                |                       |                |
|----------------|----------------|----------------|----------------|-----------------------|----------------|
| EPI_ISL_257320 | EPI_ISL_268280 | EPI_ISL_256810 | EPI_ISL_256812 | EPI_ISL_274572        | EPI_ISL_322437 |
| EPI_ISL_257899 | EPI_ISL_242593 | EPI_ISL_253195 | EPI_ISL_242659 | EPI_ISL_274570        | EPI_ISL_315881 |
| EPI_ISL_259139 | EPI_ISL_248471 | EPI_ISL_256813 | EPI_ISL_242650 | EPI_ISL_268738        | EPI_ISL_315880 |
| EPI_ISL_277631 | EPI_ISL_249014 | EPI_ISL_268281 | EPI_ISL_242596 | EPI_ISL_256409        | EPI_ISL_322475 |
| EPI_ISL_255745 | EPI_ISL_255693 | EPI_ISL_239631 | EPI_ISL_280469 | EPI_ISL_242660        | EPI_ISL_322428 |
| EPI_ISL_256816 | EPI_ISL_256421 | EPI_ISL_252573 | EPI_ISL_280472 | EPI_ISL_242614        | EPI_ISL_297737 |
| EPI_ISL_242656 | EPI_ISL_242629 | EPI_ISL_403420 | EPI_ISL_280472 | EPI_ISL_276313        | EPI_ISL_300429 |
| EPI_ISL_256082 | EPI_ISL_268734 | EPI_ISL_242591 | EPI_ISL_277517 | EPI_ISL_276269        | EPI_ISL_320645 |
| EPI_ISL_256083 | EPI_ISL_273650 | EPI_ISL_257822 | EPI_ISL_273652 | EPI_ISL_273657        | EPI_ISL_308745 |
| EPI_ISL_280473 | EPI_ISL_242658 | EPI_ISL_242619 | EPI_ISL_242597 | EPI_ISL_242602        | EPI_ISL_320288 |
| EPI_ISL_255750 | EPI_ISL_242639 | EPI_ISL_242620 | EPI_ISL_242598 | EPI_ISL_277513        | EPI_ISL_331513 |
| EPI_ISL_255748 | EPI_ISL_252572 | EPI_ISL_253189 | EPI_ISL_242627 | EPI_ISL_242631        | EPI_ISL_315939 |
| EPI_ISL_273672 | EPI_ISL_256079 | EPI_ISL_256071 | EPI_ISL_242635 | EPI_ISL_277620        | EPI_ISL_322469 |
| EPI_ISL_276312 | EPI_ISL_256405 | EPI_ISL_268282 | EPI_ISL_242655 | EPI_ISL_277619        | EPI_ISL_320325 |
| EPI_ISL_273708 | EPI_ISL_242618 | EPI_ISL_259695 | EPI_ISL_242662 | EPI_ISL_273707        | EPI_ISL_329801 |
| EPI_ISL_242628 | EPI_ISL_256074 | EPI_ISL_274436 | EPI_ISL_248461 | EPI_ISL_276284        | EPI_ISL_330160 |
| EPI_ISL_242600 | EPI_ISL_242622 | EPI_ISL_274564 | EPI_ISL_252571 | EPI_ISL_242634        | EPI_ISL_322422 |
| EPI_ISL_239746 | EPI_ISL_242606 | EPI_ISL_259691 | EPI_ISL_255918 | EPI_ISL_249069        | EPI_ISL_320326 |
| EPI_ISL_242615 | EPI_ISL_242607 | EPI_ISL_268730 | EPI_ISL_255919 | EPI_ISL_247714        | EPI_ISL_329800 |
| EPI_ISL_255700 | EPI_ISL_242613 | EPI_ISL_256080 | EPI_ISL_256065 | EPI_ISL_242651        | EPI_ISL_330161 |
| EPI_ISL_255753 | EPI_ISL_242647 | EPI_ISL_242625 | EPI_ISL_256407 | EPI_ISL_256075        | EPI_ISL_332143 |
| EPI_ISL_257318 | EPI_ISL_242648 | EPI_ISL_242626 | EPI_ISL_268729 | EPI_ISL_256076        | EPI_ISL_299057 |
| EPI_ISL_268736 | EPI_ISL_256413 | EPI_ISL_242661 | EPI_ISL_273666 | EPI_ISL_242640        | EPI_ISL_313432 |
| EPI_ISL_302521 | EPI_ISL_256414 | EPI_ISL_276909 | EPI_ISL_273676 | EPI_ISL_242595        | EPI_ISL_286932 |
| EPI_ISL_242657 | EPI_ISL_268737 | EPI_ISL_248401 | EPI_ISL_276302 | EPI_ISL_242604        | EPI_ISL_287573 |
| EPI_ISL_255697 | EPI_ISL_273702 | EPI_ISL_259692 | EPI_ISL_276305 | EPI_ISL_242601        | EPI_ISL_287574 |
| EPI_ISL_256416 | EPI_ISL_242644 | EPI_ISL_242652 | EPI_ISL_276913 | EPI_ISL_242599        | EPI_ISL_292892 |
| EPI_ISL_255920 | EPI_ISL_273701 | EPI_ISL_242653 | EPI_ISL_280468 | EPI_ISL_242603        | EPI_ISL_297717 |
| EPI_ISL_255921 | EPI_ISL_277533 | EPI_ISL_262265 | EPI_ISL_280472 | EPI_ISL_242605        | EPI_ISL_315028 |
| EPI_ISL_255923 | EPI_ISL_274569 | EPI_ISL_256426 | EPI_ISL_302520 | EPI_ISL_256811        | EPI_ISL_322439 |
| EPI_ISL_255924 | EPI_ISL_273700 | EPI_ISL_242663 | EPI_ISL_280472 | EPI_ISL_257322        | EPI_ISL_322461 |
| EPI_ISL_268728 | EPI_ISL_274573 | EPI_ISL_242646 | EPI_ISL_273674 | EPI_ISL_276263        | EPI_ISL_322435 |
| EPI_ISL_276310 | EPI_ISL_242610 | EPI_ISL_242617 | EPI_ISL_273656 | <b>Season 2017-18</b> | EPI_ISL_322429 |
| EPI_ISL_256406 | EPI_ISL_242623 | EPI_ISL_276309 | EPI_ISL_277521 | EPI_ISL_322473        | EPI_ISL_322453 |
| EPI_ISL_242608 | EPI_ISL_268732 | EPI_ISL_273703 | EPI_ISL_268731 | EPI_ISL_322483        | EPI_ISL_331234 |
| EPI_ISL_239745 | EPI_ISL_255925 | EPI_ISL_242621 | EPI_ISL_256069 | EPI_ISL_322447        | EPI_ISL_287568 |
| EPI_ISL_242592 | EPI_ISL_259694 | EPI_ISL_242632 | EPI_ISL_255688 | EPI_ISL_320292        | EPI_ISL_300223 |
| EPI_ISL_242594 | EPI_ISL_275711 | EPI_ISL_242633 | EPI_ISL_280472 | EPI_ISL_329836        | EPI_ISL_331236 |
| EPI_ISL_242641 | EPI_ISL_256415 | EPI_ISL_274437 | EPI_ISL_280472 | EPI_ISL_322468        | EPI_ISL_320287 |
| EPI_ISL_242665 | EPI_ISL_257321 | EPI_ISL_277488 | EPI_ISL_274571 | EPI_ISL_320286        | EPI_ISL_330960 |
| EPI_ISL_247952 | EPI_ISL_242637 | EPI_ISL_276314 | EPI_ISL_256427 | EPI_ISL_320644        | EPI_ISL_322450 |
| EPI_ISL_273662 | EPI_ISL_242638 | EPI_ISL_276304 | EPI_ISL_273658 | EPI_ISL_320646        | EPI_ISL_313514 |
| EPI_ISL_273682 | EPI_ISL_249008 | EPI_ISL_256417 | EPI_ISL_242616 | EPI_ISL_330264        | EPI_ISL_322440 |
| EPI_ISL_276306 | EPI_ISL_253207 | EPI_ISL_256410 | EPI_ISL_256808 | EPI_ISL_308986        | EPI_ISL_322460 |
| EPI_ISL_242649 | EPI_ISL_259687 | EPI_ISL_256412 | EPI_ISL_273704 | EPI_ISL_297725        | EPI_ISL_322489 |
| EPI_ISL_256423 | EPI_ISL_268735 | EPI_ISL_256419 | EPI_ISL_277527 | EPI_ISL_305010        | EPI_ISL_322465 |
| EPI_ISL_256078 | EPI_ISL_262307 | EPI_ISL_256408 | EPI_ISL_273706 | EPI_ISL_308964        | EPI_ISL_330034 |
| EPI_ISL_255690 | EPI_ISL_268733 | EPI_ISL_256087 | EPI_ISL_274565 | EPI_ISL_322427        | EPI_ISL_330938 |
| EPI_ISL_273651 | EPI_ISL_273664 | EPI_ISL_255696 | EPI_ISL_273655 | EPI_ISL_322482        | EPI_ISL_315768 |
| EPI_ISL_273699 | EPI_ISL_276311 | EPI_ISL_248444 | EPI_ISL_277520 | EPI_ISL_322488        | EPI_ISL_322474 |
| EPI_ISL_276911 | EPI_ISL_274566 | EPI_ISL_259693 | EPI_ISL_257324 | EPI_ISL_322441        | EPI_ISL_313518 |
| EPI_ISL_256081 | EPI_ISL_242642 | EPI_ISL_264436 | EPI_ISL_242630 | EPI_ISL_320638        | EPI_ISL_287569 |
| EPI_ISL_255926 | EPI_ISL_256420 | EPI_ISL_273698 | EPI_ISL_274568 | EPI_ISL_320295        | EPI_ISL_322486 |
| EPI_ISL_253198 | EPI_ISL_276307 | EPI_ISL_273670 | EPI_ISL_276912 | EPI_ISL_329843        | EPI_ISL_287567 |

|                |                |                       |                |                |                |
|----------------|----------------|-----------------------|----------------|----------------|----------------|
| EPI_ISL_297720 | EPI_ISL_320647 | EPI_ISL_329799        | EPI_ISL_332724 | EPI_ISL_389228 | EPI_ISL_337092 |
| EPI_ISL_303060 | EPI_ISL_322477 | EPI_ISL_331233        | EPI_ISL_364373 | EPI_ISL_395182 | EPI_ISL_337097 |
| EPI_ISL_313797 | EPI_ISL_322472 | EPI_ISL_283155        | EPI_ISL_364801 | EPI_ISL_350743 | EPI_ISL_410265 |
| EPI_ISL_315882 | EPI_ISL_322444 | EPI_ISL_291646        | EPI_ISL_350663 | EPI_ISL_377657 | EPI_ISL_364359 |
| EPI_ISL_320289 | EPI_ISL_297733 | EPI_ISL_297721        | EPI_ISL_364800 | EPI_ISL_395055 | EPI_ISL_364342 |
| EPI_ISL_322481 | EPI_ISL_297732 | EPI_ISL_308737        | EPI_ISL_364345 | EPI_ISL_364365 | EPI_ISL_351762 |
| EPI_ISL_322961 | EPI_ISL_297734 | EPI_ISL_313430        | EPI_ISL_364357 | EPI_ISL_388727 | EPI_ISL_351689 |
| EPI_ISL_287570 | EPI_ISL_297735 | EPI_ISL_286931        | EPI_ISL_350740 | EPI_ISL_388722 | EPI_ISL_350691 |
| EPI_ISL_320656 | EPI_ISL_297736 | EPI_ISL_297723        | EPI_ISL_350770 | EPI_ISL_365478 | EPI_ISL_350644 |
| EPI_ISL_320654 | EPI_ISL_315941 | EPI_ISL_313519        | EPI_ISL_351773 | EPI_ISL_344881 | EPI_ISL_350623 |
| EPI_ISL_320655 | EPI_ISL_297731 | EPI_ISL_331231        | EPI_ISL_365473 | EPI_ISL_344879 | EPI_ISL_337100 |
| EPI_ISL_322445 | EPI_ISL_322485 | EPI_ISL_321443        | EPI_ISL_337423 | EPI_ISL_365474 | EPI_ISL_337098 |
| EPI_ISL_315748 | EPI_ISL_322451 | EPI_ISL_331230        | EPI_ISL_364805 | EPI_ISL_365468 | EPI_ISL_337095 |
| EPI_ISL_287571 | EPI_ISL_322448 | EPI_ISL_322446        | EPI_ISL_364344 | EPI_ISL_365464 | EPI_ISL_351758 |
| EPI_ISL_287572 | EPI_ISL_330032 | EPI_ISL_322423        | EPI_ISL_377654 | EPI_ISL_378020 | EPI_ISL_364784 |
| EPI_ISL_313429 | EPI_ISL_331058 | EPI_ISL_322424        | EPI_ISL_394913 | EPI_ISL_394912 | EPI_ISL_368828 |
| EPI_ISL_322456 | EPI_ISL_322463 | EPI_ISL_322425        | EPI_ISL_337421 | EPI_ISL_368819 | EPI_ISL_344876 |
| EPI_ISL_299046 | EPI_ISL_322436 | EPI_ISL_331235        | EPI_ISL_351771 | EPI_ISL_378018 | EPI_ISL_350688 |
| EPI_ISL_313428 | EPI_ISL_315938 | EPI_ISL_308743        | EPI_ISL_351755 | EPI_ISL_368820 | EPI_ISL_364378 |
| EPI_ISL_332142 | EPI_ISL_322464 | EPI_ISL_282487        | EPI_ISL_350621 | EPI_ISL_357868 | EPI_ISL_350769 |
| EPI_ISL_315940 | EPI_ISL_322449 | <b>Season 2018-19</b> | EPI_ISL_337422 | EPI_ISL_355585 | EPI_ISL_364341 |
| EPI_ISL_308744 | EPI_ISL_322452 | EPI_ISL_410280        | EPI_ISL_351767 | EPI_ISL_410260 | EPI_ISL_350690 |
| EPI_ISL_315749 | EPI_ISL_297727 | EPI_ISL_410269        | EPI_ISL_364358 | EPI_ISL_350701 | EPI_ISL_410256 |
| EPI_ISL_322455 | EPI_ISL_297729 | EPI_ISL_351694        | EPI_ISL_337106 | EPI_ISL_337101 | EPI_ISL_368815 |
| EPI_ISL_322470 | EPI_ISL_297730 | EPI_ISL_350672        | EPI_ISL_364356 | EPI_ISL_388772 | EPI_ISL_365477 |
| EPI_ISL_322476 | EPI_ISL_322457 | EPI_ISL_339098        | EPI_ISL_378025 | EPI_ISL_364334 | EPI_ISL_364369 |
| EPI_ISL_322471 | EPI_ISL_322462 | EPI_ISL_339091        | EPI_ISL_350772 | EPI_ISL_365469 | EPI_ISL_364340 |
| EPI_ISL_322443 | EPI_ISL_322430 | EPI_ISL_338309        | EPI_ISL_337091 | EPI_ISL_350686 | EPI_ISL_351688 |
| EPI_ISL_330675 | EPI_ISL_322433 | EPI_ISL_332726        | EPI_ISL_337094 | EPI_ISL_364349 | EPI_ISL_337223 |
| EPI_ISL_330033 | EPI_ISL_322434 | EPI_ISL_337419        | EPI_ISL_342206 | EPI_ISL_377660 | EPI_ISL_337088 |
| EPI_ISL_330889 | EPI_ISL_320294 | EPI_ISL_339087        | EPI_ISL_349743 | EPI_ISL_410263 | EPI_ISL_337089 |
| EPI_ISL_330162 | EPI_ISL_329842 | EPI_ISL_339261        | EPI_ISL_350735 | EPI_ISL_389226 | EPI_ISL_337096 |
| EPI_ISL_330163 | EPI_ISL_329842 | EPI_ISL_342009        | EPI_ISL_377653 | EPI_ISL_395184 | EPI_ISL_337099 |
| EPI_ISL_322442 | EPI_ISL_313521 | EPI_ISL_345733        | EPI_ISL_337104 | EPI_ISL_351685 | EPI_ISL_337111 |
| EPI_ISL_321448 | EPI_ISL_322438 | EPI_ISL_365479        | EPI_ISL_344875 | EPI_ISL_364374 | EPI_ISL_337222 |
| EPI_ISL_331232 | EPI_ISL_297726 | EPI_ISL_373370        | EPI_ISL_364343 | EPI_ISL_350615 | EPI_ISL_342110 |
| EPI_ISL_313427 | EPI_ISL_297728 | EPI_ISL_377664        | EPI_ISL_364347 | EPI_ISL_364362 | EPI_ISL_342111 |
| EPI_ISL_320293 | EPI_ISL_285603 | EPI_ISL_351774        | EPI_ISL_331622 | EPI_ISL_364379 | EPI_ISL_344873 |
| EPI_ISL_320296 | EPI_ISL_286933 | EPI_ISL_373379        | EPI_ISL_364326 | EPI_ISL_364806 | EPI_ISL_345535 |
| EPI_ISL_322960 | EPI_ISL_291645 | EPI_ISL_342028        | EPI_ISL_364333 | EPI_ISL_388747 | EPI_ISL_345732 |
| EPI_ISL_330956 | EPI_ISL_292919 | EPI_ISL_346070        | EPI_ISL_339097 | EPI_ISL_388725 | EPI_ISL_346030 |
| EPI_ISL_320643 | EPI_ISL_297718 | EPI_ISL_346089        | EPI_ISL_341966 | EPI_ISL_350742 | EPI_ISL_346031 |
| EPI_ISL_322454 | EPI_ISL_297719 | EPI_ISL_351761        | EPI_ISL_364320 | EPI_ISL_344878 | EPI_ISL_346034 |
| EPI_ISL_320648 | EPI_ISL_297719 | EPI_ISL_351782        | EPI_ISL_345730 | EPI_ISL_350733 | EPI_ISL_346067 |
| EPI_ISL_322478 | EPI_ISL_297722 | EPI_ISL_373377        | EPI_ISL_350619 | EPI_ISL_377656 | EPI_ISL_346068 |
| EPI_ISL_313516 | EPI_ISL_297724 | EPI_ISL_373378        | EPI_ISL_364785 | EPI_ISL_368821 | EPI_ISL_346069 |
| EPI_ISL_322466 | EPI_ISL_297724 |                       |                |                |                |
| EPI_ISL_321444 | EPI_ISL_299907 |                       |                |                |                |
| EPI_ISL_320341 | EPI_ISL_299908 |                       |                |                |                |
| EPI_ISL_320653 | EPI_ISL_322458 |                       |                |                |                |
| EPI_ISL_329837 | EPI_ISL_322459 |                       |                |                |                |
| EPI_ISL_322479 | EPI_ISL_322467 |                       |                |                |                |
| EPI_ISL_322490 | EPI_ISL_320324 |                       |                |                |                |
| EPI_ISL_320649 |                |                       |                |                |                |

|                |                |                |                |                       |                |
|----------------|----------------|----------------|----------------|-----------------------|----------------|
| EPI_ISL_346086 | EPI_ISL_346025 | EPI_ISL_365465 | EPI_ISL_364339 | EPI_ISL_364327        | EPI_ISL_402946 |
| EPI_ISL_346088 | EPI_ISL_350614 | EPI_ISL_330159 | EPI_ISL_364355 | EPI_ISL_410267        | EPI_ISL_403969 |
| EPI_ISL_349716 | EPI_ISL_364376 | EPI_ISL_331848 | EPI_ISL_337105 | EPI_ISL_351766        | EPI_ISL_405291 |
| EPI_ISL_350609 | EPI_ISL_346085 | EPI_ISL_364322 | EPI_ISL_344882 | EPI_ISL_337425        | EPI_ISL_414033 |
| EPI_ISL_351756 | EPI_ISL_346224 | EPI_ISL_350673 | EPI_ISL_332717 | EPI_ISL_357862        | EPI_ISL_414033 |
| EPI_ISL_351756 | EPI_ISL_350610 | EPI_ISL_388720 | EPI_ISL_345729 | EPI_ISL_364381        | EPI_ISL_471273 |
| EPI_ISL_351768 | EPI_ISL_350611 | EPI_ISL_332799 | EPI_ISL_417900 | EPI_ISL_410274        | EPI_ISL_404170 |
| EPI_ISL_362198 | EPI_ISL_364336 | EPI_ISL_332723 | EPI_ISL_377661 | EPI_ISL_410271        | EPI_ISL_409366 |
| EPI_ISL_364360 | EPI_ISL_364803 | EPI_ISL_342012 | EPI_ISL_337424 | EPI_ISL_410270        | EPI_ISL_403680 |
| EPI_ISL_365466 | EPI_ISL_378028 | EPI_ISL_346026 | EPI_ISL_378026 | EPI_ISL_364328        | EPI_ISL_401511 |
| EPI_ISL_365470 | EPI_ISL_350773 | EPI_ISL_350641 | EPI_ISL_377658 | EPI_ISL_364325        | EPI_ISL_401512 |
| EPI_ISL_365472 | EPI_ISL_350737 | EPI_ISL_378023 | EPI_ISL_410275 | EPI_ISL_351759        | EPI_ISL_403965 |
| EPI_ISL_373372 | EPI_ISL_350736 | EPI_ISL_345610 | EPI_ISL_364377 | EPI_ISL_351686        | EPI_ISL_403965 |
| EPI_ISL_373372 | EPI_ISL_368810 | EPI_ISL_378019 | EPI_ISL_364332 | EPI_ISL_364335        | EPI_ISL_403966 |
| EPI_ISL_377649 | EPI_ISL_368826 | EPI_ISL_337416 | EPI_ISL_351765 | EPI_ISL_410282        | EPI_ISL_403968 |
| EPI_ISL_378027 | EPI_ISL_368818 | EPI_ISL_364346 | EPI_ISL_350674 | EPI_ISL_337109        | EPI_ISL_403971 |
| EPI_ISL_380080 | EPI_ISL_364368 | EPI_ISL_377655 | EPI_ISL_410286 | EPI_ISL_389229        | EPI_ISL_405289 |
| EPI_ISL_388721 | EPI_ISL_377662 | EPI_ISL_337110 | EPI_ISL_350616 | EPI_ISL_395181        | EPI_ISL_405290 |
| EPI_ISL_388726 | EPI_ISL_394946 | EPI_ISL_350706 | EPI_ISL_410288 | EPI_ISL_351772        | EPI_ISL_405290 |
| EPI_ISL_394911 | EPI_ISL_337085 | EPI_ISL_337418 | EPI_ISL_350618 | EPI_ISL_410281        | EPI_ISL_405293 |
| EPI_ISL_394911 | EPI_ISL_388723 | EPI_ISL_365467 | EPI_ISL_368814 | EPI_ISL_410277        | EPI_ISL_407520 |
| EPI_ISL_364337 | EPI_ISL_350744 | EPI_ISL_355586 | EPI_ISL_388743 | EPI_ISL_378021        | EPI_ISL_410037 |
| EPI_ISL_364318 | EPI_ISL_350741 | EPI_ISL_377650 | EPI_ISL_364804 | EPI_ISL_410289        | EPI_ISL_471272 |
| EPI_ISL_364338 | EPI_ISL_351760 | EPI_ISL_410290 | EPI_ISL_389225 | <b>Season 2019-20</b> | EPI_ISL_528734 |
| EPI_ISL_364350 | EPI_ISL_342109 | EPI_ISL_364371 | EPI_ISL_395183 | EPI_ISL_419384        | EPI_ISL_393724 |
| EPI_ISL_364351 | EPI_ISL_365463 | EPI_ISL_351763 | EPI_ISL_378024 | EPI_ISL_407145        | EPI_ISL_403964 |
| EPI_ISL_364352 | EPI_ISL_364348 | EPI_ISL_350607 | EPI_ISL_378029 | EPI_ISL_402930        | EPI_ISL_401513 |
| EPI_ISL_364353 | EPI_ISL_351674 | EPI_ISL_357864 | EPI_ISL_410278 | EPI_ISL_407519        | EPI_ISL_404625 |
| EPI_ISL_364354 | EPI_ISL_350727 | EPI_ISL_388724 | EPI_ISL_395053 | EPI_ISL_527239        | EPI_ISL_419087 |
| EPI_ISL_332796 | EPI_ISL_351675 | EPI_ISL_337415 | EPI_ISL_364331 | EPI_ISL_477610        | EPI_ISL_471285 |
| EPI_ISL_345534 | EPI_ISL_346023 | EPI_ISL_338305 | EPI_ISL_364329 | EPI_ISL_485775        | EPI_ISL_407100 |
| EPI_ISL_365480 | EPI_ISL_339094 | EPI_ISL_342005 | EPI_ISL_364321 | EPI_ISL_429851        | EPI_ISL_429850 |
| EPI_ISL_380069 | EPI_ISL_337084 | EPI_ISL_350705 | EPI_ISL_351777 | EPI_ISL_419114        | EPI_ISL_471386 |
| EPI_ISL_350771 | EPI_ISL_337083 | EPI_ISL_364367 | EPI_ISL_350638 | EPI_ISL_430832        | EPI_ISL_471288 |
| EPI_ISL_364361 | EPI_ISL_410259 | EPI_ISL_364319 | EPI_ISL_332795 | EPI_ISL_497911        | EPI_ISL_471538 |
| EPI_ISL_364363 | EPI_ISL_365475 | EPI_ISL_350608 | EPI_ISL_364330 | EPI_ISL_471279        | EPI_ISL_419111 |
| EPI_ISL_364364 | EPI_ISL_364324 | EPI_ISL_350726 | EPI_ISL_350734 | EPI_ISL_419082        | EPI_ISL_414034 |
| EPI_ISL_357863 | EPI_ISL_350739 | EPI_ISL_351680 | EPI_ISL_377663 | EPI_ISL_471274        | EPI_ISL_429202 |
| EPI_ISL_380079 | EPI_ISL_337093 | EPI_ISL_350702 | EPI_ISL_364375 | EPI_ISL_471275        | EPI_ISL_409365 |
| EPI_ISL_364366 | EPI_ISL_337090 | EPI_ISL_364323 | EPI_ISL_350719 | EPI_ISL_405292        | EPI_ISL_430836 |
| EPI_ISL_350648 | EPI_ISL_337102 | EPI_ISL_350675 | EPI_ISL_350613 | EPI_ISL_398129        | EPI_ISL_402942 |
| EPI_ISL_344877 | EPI_ISL_337107 | EPI_ISL_337103 | EPI_ISL_351779 | EPI_ISL_401514        | EPI_ISL_402952 |
| EPI_ISL_344883 | EPI_ISL_342006 | EPI_ISL_337108 | EPI_ISL_346087 | EPI_ISL_406319        | EPI_ISL_403970 |
| EPI_ISL_377659 | EPI_ISL_342007 | EPI_ISL_337417 | EPI_ISL_346225 | EPI_ISL_419110        | EPI_ISL_409367 |
| EPI_ISL_393783 | EPI_ISL_342205 | EPI_ISL_337420 | EPI_ISL_350605 | EPI_ISL_419113        | EPI_ISL_429216 |
| EPI_ISL_389227 | EPI_ISL_349776 | EPI_ISL_342108 | EPI_ISL_373373 | EPI_ISL_403967        | EPI_ISL_429849 |
| EPI_ISL_395180 | EPI_ISL_351757 | EPI_ISL_351764 | EPI_ISL_351776 | EPI_ISL_471276        | EPI_ISL_404167 |
| EPI_ISL_344880 | EPI_ISL_364370 | EPI_ISL_351769 | EPI_ISL_350671 | EPI_ISL_402943        | EPI_ISL_404168 |
| EPI_ISL_344874 | EPI_ISL_388719 | EPI_ISL_351783 | EPI_ISL_346028 | EPI_ISL_403727        | EPI_ISL_404169 |
|                | EPI_ISL_337087 | EPI_ISL_364372 | EPI_ISL_346033 | EPI_ISL_397335        |                |
|                | EPI_ISL_337086 | EPI_ISL_365476 | EPI_ISL_350728 |                       |                |
|                | EPI_ISL_341977 | EPI_ISL_331623 | EPI_ISL_410283 |                       |                |
|                | EPI_ISL_351781 | EPI_ISL_350639 | EPI_ISL_351778 |                       |                |
|                | EPI_ISL_351770 | EPI_ISL_350677 | EPI_ISL_351775 |                       |                |

|                |                |                |                |                |                       |
|----------------|----------------|----------------|----------------|----------------|-----------------------|
| EPI_ISL_419383 | EPI_ISL_485769 | EPI_ISL_419382 | EPI_ISL_471287 | EPI_ISL_471281 | EPI_ISL_471280        |
| EPI_ISL_517680 | EPI_ISL_419208 | EPI_ISL_471537 | EPI_ISL_471277 | EPI_ISL_471282 | EPI_ISL_471293        |
| EPI_ISL_419086 | EPI_ISL_429198 | EPI_ISL_471292 | EPI_ISL_471389 | EPI_ISL_471283 | EPI_ISL_419083        |
| EPI_ISL_471286 | EPI_ISL_429205 | EPI_ISL_471290 | EPI_ISL_419085 | EPI_ISL_471284 | <u>EPI_ISL_419084</u> |
| EPI_ISL_471388 | EPI_ISL_419385 | EPI_ISL_471289 | EPI_ISL_419112 | EPI_ISL_471384 |                       |
| EPI_ISL_477602 | EPI_ISL_471291 | EPI_ISL_471278 | EPI_ISL_419115 | EPI_ISL_528732 |                       |



**Dataset 4: Accession numbers of Bangladeshi strains (n=531) collected from 2009 to 2020**

| Accession number | Date of Collection | Accession number | Date of Collection | Accession number | Date of Collection |
|------------------|--------------------|------------------|--------------------|------------------|--------------------|
| EPI_ISL_149693   | 2013-05-07         | EPI_ISL_219090   | 2015-09-06         | EPI_ISL_233460   | 2016-06-02         |
| EPI_ISL_151804   | 2013-05-12         | EPI_ISL_219091   | 2015-09-08         | EPI_ISL_233462   | 2016-06-09         |
| EPI_ISL_168105   | 2014-06-09         | EPI_ISL_219093   | 2015-09-14         | EPI_ISL_233463   | 2016-07-13         |
| EPI_ISL_195894   | 2015-05-25         | EPI_ISL_219094   | 2015-09-14         | EPI_ISL_233464   | 2016-06-25         |
| EPI_ISL_201264   | 2015-08-12         | EPI_ISL_219095   | 2015-09-03         | EPI_ISL_233465   | 2016-06-12         |
| EPI_ISL_201265   | 2015-08-31         | EPI_ISL_219096   | 2015-09-09         | EPI_ISL_233466   | 2016-06-25         |
| EPI_ISL_201266   | 2015-08-24         | EPI_ISL_219097   | 2015-09-13         | EPI_ISL_233467   | 2016-06-13         |
| EPI_ISL_201267   | 2015-08-24         | EPI_ISL_219098   | 2015-09-21         | EPI_ISL_233468   | 2016-07-17         |
| EPI_ISL_201268   | 2015-08-26         | EPI_ISL_219099   | 2015-09-21         | EPI_ISL_233472   | 2016-06-21         |
| EPI_ISL_201269   | 2015-08-10         | EPI_ISL_219100   | 2015-09-22         | EPI_ISL_234989   | 2016-07-10         |
| EPI_ISL_201270   | 2015-08-20         | EPI_ISL_219101   | 2015-09-20         | EPI_ISL_235533   | 2016-06-26         |
| EPI_ISL_201271   | 2015-08-29         | EPI_ISL_219102   | 2015-09-19         | EPI_ISL_237338   | 2016-06-13         |
| EPI_ISL_202074   | 2015-08-10         | EPI_ISL_219103   | 2015-10-03         | EPI_ISL_238609   | 2016-07-14         |
| EPI_ISL_202076   | 2015-08-20         | EPI_ISL_219104   | 2015-10-05         | EPI_ISL_238610   | 2016-06-02         |
| EPI_ISL_202083   | 2015-08-17         | EPI_ISL_219105   | 2015-10-13         | EPI_ISL_238625   | 2016-06-27         |
| EPI_ISL_202084   | 2015-08-11         | EPI_ISL_219106   | 2015-10-13         | EPI_ISL_238626   | 2016-07-10         |
| EPI_ISL_202108   | 2015-08-29         | EPI_ISL_219107   | 2015-10-07         | EPI_ISL_238649   | 2016-09-01         |
| EPI_ISL_203579   | 2015-08-17         | EPI_ISL_219108   | 2015-10-12         | EPI_ISL_239162   | 2016-07-11         |
| EPI_ISL_208575   | 2015-09-09         | EPI_ISL_219109   | 2015-10-04         | EPI_ISL_239163   | 2016-08-08         |
| EPI_ISL_208576   | 2015-09-12         | EPI_ISL_219110   | 2015-10-05         | EPI_ISL_239164   | 2016-09-24         |
| EPI_ISL_208578   | 2015-09-03         | EPI_ISL_219131   | 2015-11-12         | EPI_ISL_240304   | 2016-09-24         |
| EPI_ISL_208579   | 2015-09-03         | EPI_ISL_219132   | 2015-11-09         | EPI_ISL_240342   | 2016-07-10         |
| EPI_ISL_208580   | 2015-10-19         | EPI_ISL_219133   | 2015-12-03         | EPI_ISL_242687   | 2016-06-11         |
| EPI_ISL_208581   | 2015-09-13         | EPI_ISL_220271   | 2015-09-08         | EPI_ISL_242688   | 2016-07-13         |
| EPI_ISL_208586   | 2015-09-07         | EPI_ISL_223356   | 2015-09-14         | EPI_ISL_242689   | 2016-06-12         |
| EPI_ISL_208590   | 2015-11-09         | EPI_ISL_223357   | 2015-09-19         | EPI_ISL_259116   | 2016-09-01         |
| EPI_ISL_208595   | 2015-12-03         | EPI_ISL_223995   | 2015-10-05         | EPI_ISL_268374   | 2017-03-12         |
| EPI_ISL_208596   | 2015-11-18         | EPI_ISL_225033   | 2015-10-03         | EPI_ISL_268375   | 2017-03-23         |
| EPI_ISL_208610   | 2015-11-12         | EPI_ISL_233432   | 2016-07-14         | EPI_ISL_275771   | 2017-06-14         |
| EPI_ISL_208611   | 2015-11-07         | EPI_ISL_233435   | 2016-07-12         | EPI_ISL_275772   | 2017-06-16         |
| EPI_ISL_208617   | 2015-11-10         | EPI_ISL_233436   | 2016-07-12         | EPI_ISL_275773   | 2017-06-12         |
| EPI_ISL_208622   | 2015-12-03         | EPI_ISL_233440   | 2016-07-12         | EPI_ISL_275774   | 2017-06-15         |
| EPI_ISL_208631   | 2015-11-16         | EPI_ISL_233443   | 2016-07-02         | EPI_ISL_275775   | 2017-06-13         |
| EPI_ISL_208637   | 2015-09-03         | EPI_ISL_233444   | 2016-07-02         | EPI_ISL_275776   | 2017-06-13         |
| EPI_ISL_211677   | 2015-09-10         | EPI_ISL_233446   | 2016-06-20         | EPI_ISL_275777   | 2017-06-19         |
| EPI_ISL_211898   | 2015-11-03         | EPI_ISL_233448   | 2016-06-25         | EPI_ISL_275778   | 2017-06-24         |
| EPI_ISL_212959   | 2015-10-03         | EPI_ISL_233449   | 2016-06-25         | EPI_ISL_275779   | 2017-06-21         |
| EPI_ISL_212960   | 2015-10-17         | EPI_ISL_233450   | 2016-06-27         | EPI_ISL_275781   | 2017-06-19         |
| EPI_ISL_212961   | 2015-09-17         | EPI_ISL_233451   | 2016-06-27         | EPI_ISL_275782   | 2017-06-19         |
| EPI_ISL_219086   | 2015-09-14         | EPI_ISL_233452   | 2016-06-11         | EPI_ISL_275783   | 2017-06-19         |
| EPI_ISL_219087   | 2015-09-14         | EPI_ISL_233453   | 2016-06-20         | EPI_ISL_275784   | 2017-06-21         |
| EPI_ISL_219088   | 2015-09-07         | EPI_ISL_233454   | 2016-06-23         | EPI_ISL_275785   | 2017-06-20         |
| EPI_ISL_219089   | 2015-09-02         | EPI_ISL_233458   | 2016-07-11         | EPI_ISL_275786   | 2017-06-06         |

| <b>Accession number</b> | <b>Date of Collection</b> | <b>Accession number</b> | <b>Date of Collection</b> | <b>Accession number</b> | <b>Date of Collection</b> |
|-------------------------|---------------------------|-------------------------|---------------------------|-------------------------|---------------------------|
| EPI_ISL_275787          | 2017-06-12                | EPI_ISL_286120          | 2017-06-11                | EPI_ISL_340405          | 2017-08-03                |
| EPI_ISL_275788          | 2017-06-13                | EPI_ISL_286121          | 2017-06-03                | EPI_ISL_340421          | 2017-08-03                |
| EPI_ISL_277148          | 2017-07-01                | EPI_ISL_288498          | 2017-07-19                | EPI_ISL_347909          | 2018-10-09                |
| EPI_ISL_277149          | 2017-07-01                | EPI_ISL_310576          | 2013-01-31                | EPI_ISL_357821          | 2018-09-09                |
| EPI_ISL_277150          | 2017-06-14                | EPI_ISL_330248          | 2018-07-24                | EPI_ISL_363639          | 2018-09-10                |
| EPI_ISL_277151          | 2017-06-13                | EPI_ISL_330474          | 2018-01-07                | EPI_ISL_363640          | 2018-09-10                |
| EPI_ISL_277152          | 2017-06-13                | EPI_ISL_330476          | 2018-02-07                | EPI_ISL_368161          | 2019-05-12                |
| EPI_ISL_277153          | 2017-06-13                | EPI_ISL_330482          | 2018-06-11                | EPI_ISL_368171          | 2019-05-15                |
| EPI_ISL_277154          | 2017-06-04                | EPI_ISL_330483          | 2018-06-11                | EPI_ISL_368175          | 2019-05-14                |
| EPI_ISL_277155          | 2017-06-12                | EPI_ISL_330485          | 2018-06-24                | EPI_ISL_368185          | 2019-05-22                |
| EPI_ISL_277157          | 2017-06-24                | EPI_ISL_330488          | 2018-07-11                | EPI_ISL_368208          | 2019-04-28                |
| EPI_ISL_277158          | 2017-06-22                | EPI_ISL_330489          | 2018-07-11                | EPI_ISL_378055          | 2019-05-03                |
| EPI_ISL_277159          | 2017-06-11                | EPI_ISL_330490          | 2018-07-18                | EPI_ISL_378060          | 2019-05-17                |
| EPI_ISL_277160          | 2017-06-11                | EPI_ISL_330926          | 2018-07-11                | EPI_ISL_378062          | 2019-05-19                |
| EPI_ISL_277269          | 2017-05-09                | EPI_ISL_330927          | 2018-02-07                | EPI_ISL_378063          | 2019-05-24                |
| EPI_ISL_277270          | 2017-05-07                | EPI_ISL_330939          | 2018-06-11                | EPI_ISL_378064          | 2019-05-25                |
| EPI_ISL_277271          | 2017-05-16                | EPI_ISL_330940          | 2018-07-11                | EPI_ISL_378065          | 2019-05-22                |
| EPI_ISL_277272          | 2017-05-16                | EPI_ISL_330941          | 2018-07-24                | EPI_ISL_378066          | 2019-05-23                |
| EPI_ISL_277273          | 2017-05-04                | EPI_ISL_330942          | 2018-06-11                | EPI_ISL_378068          | 2019-05-22                |
| EPI_ISL_277298          | 2017-01-01                | EPI_ISL_330943          | 2018-07-18                | EPI_ISL_378069          | 2019-05-20                |
| EPI_ISL_277299          | 2017-01-01                | EPI_ISL_331045          | 2018-06-24                | EPI_ISL_378070          | 2019-05-22                |
| EPI_ISL_277300          | 2017-01-01                | EPI_ISL_332954          | 2018-08-13                | EPI_ISL_378071          | 2019-05-24                |
| EPI_ISL_277487          | 2017-06-11                | EPI_ISL_332958          | 2018-08-27                | EPI_ISL_378072          | 2019-05-21                |
| EPI_ISL_282880          | 2017-08-16                | EPI_ISL_332964          | 2018-08-01                | EPI_ISL_378074          | 2019-05-11                |
| EPI_ISL_282881          | 2017-08-03                | EPI_ISL_332965          | 2018-07-30                | EPI_ISL_386840          | 2019-05-29                |
| EPI_ISL_282882          | 2017-08-02                | EPI_ISL_332966          | 2018-08-28                | EPI_ISL_386863          | 2019-05-27                |
| EPI_ISL_282883          | 2017-08-03                | EPI_ISL_332978          | 2018-08-06                | EPI_ISL_390019          | 2019-06-15                |
| EPI_ISL_283318          | 2017-06-21                | EPI_ISL_332979          | 2018-08-28                | EPI_ISL_390031          | 2019-06-12                |
| EPI_ISL_283319          | 2017-06-24                | EPI_ISL_332980          | 2018-08-09                | EPI_ISL_390047          | 2019-06-12                |
| EPI_ISL_283320          | 2017-06-13                | EPI_ISL_333438          | 2018-07-14                | EPI_ISL_390048          | 2019-06-10                |
| EPI_ISL_283321          | 2017-05-07                | EPI_ISL_333439          | 2018-07-24                | EPI_ISL_390050          | 2019-06-09                |
| EPI_ISL_283322          | 2017-06-19                | EPI_ISL_333441          | 2018-07-05                | EPI_ISL_390051          | 2019-06-09                |
| EPI_ISL_283323          | 2017-06-21                | EPI_ISL_333457          | 2018-08-28                | EPI_ISL_390052          | 2019-06-01                |
| EPI_ISL_285881          | 2017-07-01                | EPI_ISL_333481          | 2018-08-18                | EPI_ISL_390053          | 2019-06-09                |
| EPI_ISL_285882          | 2017-06-14                | EPI_ISL_333853          | 2018-01-07                | EPI_ISL_390056          | 2019-06-11                |
| EPI_ISL_285883          | 2017-06-24                | EPI_ISL_334143          | 2018-08-09                | EPI_ISL_390057          | 2019-06-15                |
| EPI_ISL_285884          | 2017-06-22                | EPI_ISL_334144          | 2018-07-24                | EPI_ISL_390059          | 2019-06-11                |
| EPI_ISL_286017          | 2017-06-13                | EPI_ISL_334145          | 2018-07-05                | EPI_ISL_390060          | 2019-06-12                |
| EPI_ISL_286032          | 2017-08-02                | EPI_ISL_334147          | 2018-07-14                | EPI_ISL_390062          | 2019-06-13                |
| EPI_ISL_286060          | 2017-08-13                | EPI_ISL_334154          | 2018-08-27                | EPI_ISL_390064          | 2019-06-12                |
| EPI_ISL_286061          | 2017-08-10                | EPI_ISL_336710          | 2018-08-28                | EPI_ISL_390065          | 2019-06-16                |
| EPI_ISL_286068          | 2017-08-03                | EPI_ISL_336711          | 2018-08-01                | EPI_ISL_390066          | 2019-06-14                |
| EPI_ISL_286069          | 2017-08-03                | EPI_ISL_336712          | 2018-08-27                | EPI_ISL_390067          | 2019-06-11                |
| EPI_ISL_286118          | 2017-06-11                | EPI_ISL_336713          | 2018-08-06                | EPI_ISL_390068          | 2019-06-15                |
| EPI_ISL_286119          | 2017-07-19                | EPI_ISL_336714          | 2018-08-28                | EPI_ISL_390069          | 2019-06-10                |

| <b>Accession number</b> | <b>Date of Collection</b> | <b>Accession number</b> | <b>Date of Collection</b> | <b>Accession number</b> | <b>Date of Collection</b> |
|-------------------------|---------------------------|-------------------------|---------------------------|-------------------------|---------------------------|
| EPI_ISL_390071          | 2019-05-28                | EPI_ISL_390172          | 2019-06-10                | EPI_ISL_391152          | 2019-06-20                |
| EPI_ISL_390072          | 2019-05-30                | EPI_ISL_390173          | 2019-06-15                | EPI_ISL_391154          | 2019-06-20                |
| EPI_ISL_390073          | 2019-05-27                | EPI_ISL_390174          | 2019-06-12                | EPI_ISL_391155          | 2019-06-22                |
| EPI_ISL_390074          | 2019-05-25                | EPI_ISL_390175          | 2019-06-12                | EPI_ISL_391156          | 2019-06-22                |
| EPI_ISL_390075          | 2019-06-08                | EPI_ISL_390176          | 2019-06-15                | EPI_ISL_391157          | 2019-06-22                |
| EPI_ISL_390076          | 2019-06-09                | EPI_ISL_390179          | 2019-06-11                | EPI_ISL_391159          | 2019-06-22                |
| EPI_ISL_390077          | 2019-06-08                | EPI_ISL_390180          | 2019-06-15                | EPI_ISL_391161          | 2019-06-23                |
| EPI_ISL_390078          | 2019-06-08                | EPI_ISL_390181          | 2019-06-12                | EPI_ISL_391162          | 2019-06-23                |
| EPI_ISL_390079          | 2019-06-01                | EPI_ISL_390182          | 2019-06-11                | EPI_ISL_391163          | 2019-06-23                |
| EPI_ISL_390080          | 2019-06-01                | EPI_ISL_390183          | 2019-06-12                | EPI_ISL_391164          | 2019-06-23                |
| EPI_ISL_390081          | 2019-06-01                | EPI_ISL_390184          | 2019-06-12                | EPI_ISL_391165          | 2019-06-23                |
| EPI_ISL_390082          | 2019-06-09                | EPI_ISL_390185          | 2019-06-15                | EPI_ISL_391166          | 2019-06-24                |
| EPI_ISL_390083          | 2019-06-09                | EPI_ISL_390186          | 2019-06-15                | EPI_ISL_391167          | 2019-06-24                |
| EPI_ISL_390084          | 2019-06-09                | EPI_ISL_390187          | 2019-06-12                | EPI_ISL_391168          | 2019-06-24                |
| EPI_ISL_390085          | 2019-05-26                | EPI_ISL_390188          | 2019-06-15                | EPI_ISL_391169          | 2019-06-24                |
| EPI_ISL_390140          | 2019-06-08                | EPI_ISL_390189          | 2019-05-28                | EPI_ISL_391170          | 2019-06-24                |
| EPI_ISL_390141          | 2019-06-17                | EPI_ISL_390190          | 2019-06-12                | EPI_ISL_391171          | 2019-06-25                |
| EPI_ISL_390142          | 2019-06-19                | EPI_ISL_390191          | 2019-06-16                | EPI_ISL_391172          | 2019-06-25                |
| EPI_ISL_390143          | 2019-06-18                | EPI_ISL_390192          | 2019-06-12                | EPI_ISL_391173          | 2019-06-25                |
| EPI_ISL_390144          | 2019-06-18                | EPI_ISL_390193          | 2019-05-30                | EPI_ISL_391175          | 2019-06-26                |
| EPI_ISL_390145          | 2019-06-17                | EPI_ISL_390195          | 2019-05-26                | EPI_ISL_391177          | 2019-06-26                |
| EPI_ISL_390146          | 2019-06-17                | EPI_ISL_390198          | 2019-06-01                | EPI_ISL_391178          | 2019-06-26                |
| EPI_ISL_390147          | 2019-06-17                | EPI_ISL_390199          | 2019-06-22                | EPI_ISL_391179          | 2019-06-26                |
| EPI_ISL_390149          | 2019-06-20                | EPI_ISL_391130          | 2019-06-17                | EPI_ISL_391180          | 2019-06-26                |
| EPI_ISL_390150          | 2019-06-22                | EPI_ISL_391131          | 2019-06-17                | EPI_ISL_391181          | 2019-06-26                |
| EPI_ISL_390151          | 2019-06-20                | EPI_ISL_391132          | 2019-06-17                | EPI_ISL_391182          | 2019-06-26                |
| EPI_ISL_390152          | 2019-06-20                | EPI_ISL_391133          | 2019-06-18                | EPI_ISL_391183          | 2019-06-26                |
| EPI_ISL_390153          | 2019-06-23                | EPI_ISL_391134          | 2019-06-18                | EPI_ISL_391358          | 2019-06-26                |
| EPI_ISL_390154          | 2019-06-19                | EPI_ISL_391135          | 2019-06-18                | EPI_ISL_391359          | 2019-06-26                |
| EPI_ISL_390155          | 2019-06-23                | EPI_ISL_391136          | 2019-06-18                | EPI_ISL_391360          | 2019-06-24                |
| EPI_ISL_390156          | 2019-06-19                | EPI_ISL_391137          | 2019-06-18                | EPI_ISL_391363          | 2019-06-22                |
| EPI_ISL_390157          | 2019-06-23                | EPI_ISL_391138          | 2019-06-18                | EPI_ISL_391364          | 2019-06-22                |
| EPI_ISL_390158          | 2019-06-22                | EPI_ISL_391139          | 2019-06-19                | EPI_ISL_391365          | 2019-06-19                |
| EPI_ISL_390159          | 2019-06-21                | EPI_ISL_391140          | 2019-06-19                | EPI_ISL_395138          | 2019-07-13                |
| EPI_ISL_390160          | 2019-06-19                | EPI_ISL_391141          | 2019-06-19                | EPI_ISL_395139          | 2019-07-08                |
| EPI_ISL_390161          | 2019-06-13                | EPI_ISL_391142          | 2019-06-19                | EPI_ISL_395140          | 2019-07-11                |
| EPI_ISL_390162          | 2019-06-11                | EPI_ISL_391143          | 2019-06-19                | EPI_ISL_395141          | 2019-07-09                |
| EPI_ISL_390163          | 2019-06-16                | EPI_ISL_391144          | 2019-06-19                | EPI_ISL_395142          | 2019-07-09                |
| EPI_ISL_390164          | 2019-06-20                | EPI_ISL_391145          | 2019-06-19                | EPI_ISL_395143          | 2019-07-13                |
| EPI_ISL_390165          | 2019-06-11                | EPI_ISL_391146          | 2019-06-19                | EPI_ISL_395144          | 2019-07-07                |
| EPI_ISL_390166          | 2019-06-13                | EPI_ISL_391147          | 2019-06-19                | EPI_ISL_395145          | 2019-07-04                |
| EPI_ISL_390167          | 2019-06-12                | EPI_ISL_391148          | 2019-06-20                | EPI_ISL_395146          | 2019-07-06                |
| EPI_ISL_390168          | 2019-06-10                | EPI_ISL_391149          | 2019-06-20                | EPI_ISL_395147          | 2019-07-07                |
| EPI_ISL_390169          | 2019-06-13                | EPI_ISL_391150          | 2019-06-20                | EPI_ISL_395156          | 2019-07-10                |
| EPI_ISL_390170          | 2019-06-15                | EPI_ISL_391151          | 2019-06-20                | EPI_ISL_395157          | 2019-07-10                |

| <b>Accession number</b> | <b>Date of Collection</b> | <b>Accession number</b> | <b>Date of Collection</b> | <b>Accession number</b> | <b>Date of Collection</b> |
|-------------------------|---------------------------|-------------------------|---------------------------|-------------------------|---------------------------|
| EPI_ISL_395380          | 2019-07-13                | EPI_ISL_398345          | 2019-06-24                | EPI_ISL_398398          | 2019-07-11                |
| EPI_ISL_395381          | 2019-07-11                | EPI_ISL_398346          | 2019-08-21                | EPI_ISL_398399          | 2019-07-14                |
| EPI_ISL_395383          | 2019-07-10                | EPI_ISL_398347          | 2019-08-22                | EPI_ISL_398400          | 2019-07-13                |
| EPI_ISL_395384          | 2019-07-09                | EPI_ISL_398348          | 2019-08-21                | EPI_ISL_398401          | 2019-06-17                |
| EPI_ISL_395385          | 2019-07-09                | EPI_ISL_398349          | 2019-08-20                | EPI_ISL_398402          | 2019-06-24                |
| EPI_ISL_395386          | 2019-07-11                | EPI_ISL_398350          | 2019-06-22                | EPI_ISL_398403          | 2019-07-16                |
| EPI_ISL_395387          | 2019-07-13                | EPI_ISL_398351          | 2019-08-20                | EPI_ISL_398404          | 2019-07-17                |
| EPI_ISL_395389          | 2019-07-02                | EPI_ISL_398352          | 2019-08-19                | EPI_ISL_398405          | 2019-06-24                |
| EPI_ISL_395390          | 2019-07-02                | EPI_ISL_398353          | 2019-08-10                | EPI_ISL_398529          | 2019-07-06                |
| EPI_ISL_395392          | 2019-07-07                | EPI_ISL_398354          | 2019-08-08                | EPI_ISL_398530          | 2019-07-09                |
| EPI_ISL_395394          | 2019-07-04                | EPI_ISL_398355          | 2019-08-18                | EPI_ISL_398531          | 2019-07-01                |
| EPI_ISL_395395          | 2019-07-03                | EPI_ISL_398356          | 2019-08-08                | EPI_ISL_398775          | 2019-07-14                |
| EPI_ISL_395396          | 2019-07-02                | EPI_ISL_398357          | 2019-08-10                | EPI_ISL_398824          | 2019-08-07                |
| EPI_ISL_395397          | 2019-07-06                | EPI_ISL_398358          | 2019-08-07                | EPI_ISL_398839          | 2019-06-22                |
| EPI_ISL_395398          | 2019-07-03                | EPI_ISL_398359          | 2019-08-04                | EPI_ISL_398840          | 2019-06-24                |
| EPI_ISL_395399          | 2019-07-02                | EPI_ISL_398360          | 2019-08-04                | EPI_ISL_398841          | 2019-06-24                |
| EPI_ISL_395400          | 2019-07-03                | EPI_ISL_398362          | 2019-08-05                | EPI_ISL_398844          | 2019-08-26                |
| EPI_ISL_395401          | 2019-07-04                | EPI_ISL_398363          | 2019-08-03                | EPI_ISL_398845          | 2019-08-28                |
| EPI_ISL_395402          | 2019-07-02                | EPI_ISL_398364          | 2019-08-03                | EPI_ISL_398851          | 2019-07-16                |
| EPI_ISL_395403          | 2019-07-02                | EPI_ISL_398365          | 2019-08-03                | EPI_ISL_398852          | 2019-07-21                |
| EPI_ISL_395404          | 2019-07-08                | EPI_ISL_398366          | 2019-08-05                | EPI_ISL_400799          | 2019-10-05                |
| EPI_ISL_395406          | 2019-07-11                | EPI_ISL_398367          | 2019-08-05                | EPI_ISL_400801          | 2019-10-06                |
| EPI_ISL_395416          | 2019-07-22                | EPI_ISL_398368          | 2019-08-04                | EPI_ISL_400802          | 2019-10-06                |
| EPI_ISL_395417          | 2019-07-30                | EPI_ISL_398369          | 2019-08-04                | EPI_ISL_400819          | 2019-10-12                |
| EPI_ISL_395418          | 2019-07-29                | EPI_ISL_398370          | 2019-07-29                | EPI_ISL_400820          | 2019-10-12                |
| EPI_ISL_395419          | 2019-07-23                | EPI_ISL_398371          | 2019-07-23                | EPI_ISL_401016          | 2019-06-23                |
| EPI_ISL_395425          | 2019-07-11                | EPI_ISL_398372          | 2019-07-28                | EPI_ISL_401317          | 2019-06-25                |
| EPI_ISL_395447          | 2019-07-11                | EPI_ISL_398373          | 2019-07-25                | EPI_ISL_401321          | 2019-06-25                |
| EPI_ISL_395448          | 2019-07-14                | EPI_ISL_398374          | 2019-07-24                | EPI_ISL_402450          | 2019-10-20                |
| EPI_ISL_395449          | 2019-07-13                | EPI_ISL_398375          | 2019-07-23                | EPI_ISL_402452          | 2019-10-02                |
| EPI_ISL_395451          | 2019-07-08                | EPI_ISL_398376          | 2019-07-29                | EPI_ISL_402453          | 2019-09-29                |
| EPI_ISL_397170          | 2019-07-02                | EPI_ISL_398377          | 2019-07-27                | EPI_ISL_402454          | 2019-09-28                |
| EPI_ISL_397176          | 2019-06-29                | EPI_ISL_398378          | 2019-07-27                | EPI_ISL_402461          | 2019-10-19                |
| EPI_ISL_397224          | 2019-07-09                | EPI_ISL_398386          | 2019-07-17                | EPI_ISL_402462          | 2019-10-24                |
| EPI_ISL_398329          | 2019-07-22                | EPI_ISL_398388          | 2019-07-20                | EPI_ISL_404745          | 2019-06-24                |
| EPI_ISL_398330          | 2019-07-18                | EPI_ISL_398389          | 2019-07-17                | EPI_ISL_404753          | 2019-06-24                |
| EPI_ISL_398331          | 2019-07-15                | EPI_ISL_398390          | 2019-07-21                | EPI_ISL_409039          | 2019-07-02                |
| EPI_ISL_398332          | 2019-07-17                | EPI_ISL_398391          | 2019-07-18                | EPI_ISL_430749          | 2019-10-19                |
| EPI_ISL_398338          | 2019-04-27                | EPI_ISL_398392          | 2019-07-17                | EPI_ISL_471531          | 2019-07-01                |
| EPI_ISL_398339          | 2019-04-27                | EPI_ISL_398393          | 2019-07-17                | EPI_ISL_491803          | 2019-10-06                |
| EPI_ISL_398340          | 2019-06-24                | EPI_ISL_398394          | 2019-07-18                | EPI_ISL_491817          | 2019-08-19                |
| EPI_ISL_398342          | 2019-07-01                | EPI_ISL_398395          | 2019-07-18                | EPI_ISL_584002          | 2020-01-03                |
| EPI_ISL_398343          | 2019-07-02                | EPI_ISL_398396          | 2019-08-25                | EPI_ISL_74079           | 2009-05-17                |
| EPI_ISL_398344          | 2019-08-26                | EPI_ISL_398397          | 2019-07-13                | EPI_ISL_96082           | 2011-05-19                |

## Dataset 5: Accession numbers of South-South East Asian strains used to track evolutionary rate for HA gene (Jan 2015-Dec 2020)

### Selected from Bangladesh (n=700)

|                 |                |                |                |                |                |
|-----------------|----------------|----------------|----------------|----------------|----------------|
| EPI_ISL_1296491 | EPI_ISL_882844 | EPI_ISL_398404 | EPI_ISL_398347 | EPI_ISL_395143 | EPI_ISL_391154 |
| EPI_ISL_1015492 | EPI_ISL_882843 | EPI_ISL_398403 | EPI_ISL_398346 | EPI_ISL_395142 | EPI_ISL_391153 |
| EPI_ISL_1015491 | EPI_ISL_882842 | EPI_ISL_398402 | EPI_ISL_398341 | EPI_ISL_395141 | EPI_ISL_391152 |
| EPI_ISL_1015489 | EPI_ISL_882841 | EPI_ISL_398401 | EPI_ISL_398332 | EPI_ISL_395140 | EPI_ISL_391151 |
| EPI_ISL_1015488 | EPI_ISL_882840 | EPI_ISL_398400 | EPI_ISL_398331 | EPI_ISL_395139 | EPI_ISL_391150 |
| EPI_ISL_1015487 | EPI_ISL_882839 | EPI_ISL_398399 | EPI_ISL_398330 | EPI_ISL_395138 | EPI_ISL_391148 |
| EPI_ISL_1015485 | EPI_ISL_882838 | EPI_ISL_398398 | EPI_ISL_398329 | EPI_ISL_392549 | EPI_ISL_391146 |
| EPI_ISL_1015484 | EPI_ISL_882837 | EPI_ISL_398397 | EPI_ISL_397224 | EPI_ISL_391163 | EPI_ISL_391145 |
| EPI_ISL_965042  | EPI_ISL_882836 | EPI_ISL_398396 | EPI_ISL_397222 | EPI_ISL_391365 | EPI_ISL_391144 |
| EPI_ISL_965041  | EPI_ISL_882835 | EPI_ISL_398395 | EPI_ISL_395451 | EPI_ISL_391137 | EPI_ISL_391143 |
| EPI_ISL_965040  | EPI_ISL_767337 | EPI_ISL_398394 | EPI_ISL_395450 | EPI_ISL_391147 | EPI_ISL_391142 |
| EPI_ISL_965039  | EPI_ISL_767336 | EPI_ISL_398393 | EPI_ISL_395449 | EPI_ISL_391364 | EPI_ISL_391141 |
| EPI_ISL_965038  | EPI_ISL_766852 | EPI_ISL_398392 | EPI_ISL_395448 | EPI_ISL_391149 | EPI_ISL_391139 |
| EPI_ISL_882881  | EPI_ISL_717690 | EPI_ISL_398391 | EPI_ISL_395447 | EPI_ISL_391363 | EPI_ISL_391138 |
| EPI_ISL_882880  | EPI_ISL_717689 | EPI_ISL_398390 | EPI_ISL_395425 | EPI_ISL_391362 | EPI_ISL_391136 |
| EPI_ISL_882879  | EPI_ISL_717688 | EPI_ISL_398389 | EPI_ISL_395419 | EPI_ISL_391132 | EPI_ISL_391135 |
| EPI_ISL_882878  | EPI_ISL_717687 | EPI_ISL_398388 | EPI_ISL_395418 | EPI_ISL_391155 | EPI_ISL_391134 |
| EPI_ISL_882877  | EPI_ISL_717686 | EPI_ISL_398386 | EPI_ISL_395417 | EPI_ISL_391161 | EPI_ISL_391133 |
| EPI_ISL_882876  | EPI_ISL_717685 | EPI_ISL_398378 | EPI_ISL_395416 | EPI_ISL_391140 | EPI_ISL_391131 |
| EPI_ISL_882875  | EPI_ISL_717684 | EPI_ISL_398377 | EPI_ISL_395415 | EPI_ISL_391182 | EPI_ISL_391130 |
| EPI_ISL_882874  | EPI_ISL_717683 | EPI_ISL_398376 | EPI_ISL_395406 | EPI_ISL_391361 | EPI_ISL_391129 |
| EPI_ISL_882873  | EPI_ISL_717682 | EPI_ISL_398375 | EPI_ISL_395404 | EPI_ISL_391180 | EPI_ISL_390199 |
| EPI_ISL_882871  | EPI_ISL_717681 | EPI_ISL_398374 | EPI_ISL_395403 | EPI_ISL_391360 | EPI_ISL_390198 |
| EPI_ISL_882870  | EPI_ISL_717680 | EPI_ISL_398373 | EPI_ISL_395402 | EPI_ISL_391167 | EPI_ISL_390197 |
| EPI_ISL_882869  | EPI_ISL_717679 | EPI_ISL_398372 | EPI_ISL_395401 | EPI_ISL_391359 | EPI_ISL_390196 |
| EPI_ISL_882868  | EPI_ISL_717678 | EPI_ISL_398371 | EPI_ISL_395400 | EPI_ISL_391358 | EPI_ISL_390195 |
| EPI_ISL_882867  | EPI_ISL_717677 | EPI_ISL_398370 | EPI_ISL_395399 | EPI_ISL_391171 | EPI_ISL_390194 |
| EPI_ISL_882866  | EPI_ISL_717676 | EPI_ISL_398369 | EPI_ISL_395398 | EPI_ISL_391176 | EPI_ISL_390193 |
| EPI_ISL_882865  | EPI_ISL_717675 | EPI_ISL_398368 | EPI_ISL_395397 | EPI_ISL_391183 | EPI_ISL_390192 |
| EPI_ISL_882864  | EPI_ISL_717674 | EPI_ISL_398367 | EPI_ISL_395396 | EPI_ISL_391181 | EPI_ISL_390069 |
| EPI_ISL_882863  | EPI_ISL_717673 | EPI_ISL_398366 | EPI_ISL_395395 | EPI_ISL_391179 | EPI_ISL_390191 |
| EPI_ISL_882862  | EPI_ISL_584005 | EPI_ISL_398365 | EPI_ISL_395394 | EPI_ISL_391178 | EPI_ISL_390190 |
| EPI_ISL_882861  | EPI_ISL_584004 | EPI_ISL_398364 | EPI_ISL_395392 | EPI_ISL_391177 | EPI_ISL_390189 |
| EPI_ISL_882860  | EPI_ISL_584003 | EPI_ISL_398363 | EPI_ISL_395391 | EPI_ISL_391175 | EPI_ISL_390188 |
| EPI_ISL_882859  | EPI_ISL_584002 | EPI_ISL_398362 | EPI_ISL_395390 | EPI_ISL_391174 | EPI_ISL_390187 |
| EPI_ISL_882858  | EPI_ISL_402462 | EPI_ISL_398361 | EPI_ISL_395389 | EPI_ISL_391173 | EPI_ISL_390186 |
| EPI_ISL_882857  | EPI_ISL_402454 | EPI_ISL_398360 | EPI_ISL_395387 | EPI_ISL_391172 | EPI_ISL_390185 |
| EPI_ISL_882856  | EPI_ISL_402453 | EPI_ISL_398359 | EPI_ISL_395386 | EPI_ISL_391170 | EPI_ISL_390184 |
| EPI_ISL_882855  | EPI_ISL_402452 | EPI_ISL_398358 | EPI_ISL_395385 | EPI_ISL_391169 | EPI_ISL_390183 |
| EPI_ISL_882854  | EPI_ISL_402450 | EPI_ISL_398357 | EPI_ISL_395384 | EPI_ISL_391168 | EPI_ISL_390182 |
| EPI_ISL_882853  | EPI_ISL_401321 | EPI_ISL_398356 | EPI_ISL_395383 | EPI_ISL_391166 | EPI_ISL_390181 |
| EPI_ISL_882852  | EPI_ISL_401317 | EPI_ISL_398355 | EPI_ISL_395381 | EPI_ISL_391165 | EPI_ISL_390180 |
| EPI_ISL_882851  | EPI_ISL_398852 | EPI_ISL_398354 | EPI_ISL_395380 | EPI_ISL_391164 | EPI_ISL_390179 |
| EPI_ISL_882850  | EPI_ISL_398851 | EPI_ISL_398353 | EPI_ISL_395157 | EPI_ISL_391162 | EPI_ISL_390178 |
| EPI_ISL_882849  | EPI_ISL_398847 | EPI_ISL_398352 | EPI_ISL_395156 | EPI_ISL_391160 | EPI_ISL_390177 |
| EPI_ISL_882848  | EPI_ISL_398845 | EPI_ISL_398351 | EPI_ISL_395147 | EPI_ISL_391159 | EPI_ISL_390176 |
| EPI_ISL_882847  | EPI_ISL_398824 | EPI_ISL_398350 | EPI_ISL_395146 | EPI_ISL_391158 | EPI_ISL_390175 |
| EPI_ISL_882846  | EPI_ISL_398775 | EPI_ISL_398349 | EPI_ISL_395145 | EPI_ISL_391157 | EPI_ISL_390174 |
| EPI_ISL_882845  | EPI_ISL_398405 | EPI_ISL_398348 | EPI_ISL_395144 | EPI_ISL_391156 | EPI_ISL_390173 |

|                |                |                |                |                |                 |
|----------------|----------------|----------------|----------------|----------------|-----------------|
| EPI_ISL_390172 | EPI_ISL_390064 | EPI_ISL_332980 | EPI_ISL_270162 | EPI_ISL_220270 | EPI_ISL_208581  |
| EPI_ISL_390171 | EPI_ISL_390062 | EPI_ISL_332978 | EPI_ISL_268375 | EPI_ISL_219133 | EPI_ISL_208580  |
| EPI_ISL_390170 | EPI_ISL_390060 | EPI_ISL_332954 | EPI_ISL_268374 | EPI_ISL_219132 | EPI_ISL_208579  |
| EPI_ISL_390169 | EPI_ISL_390059 | EPI_ISL_286069 | EPI_ISL_259116 | EPI_ISL_219131 | EPI_ISL_208578  |
| EPI_ISL_390168 | EPI_ISL_390057 | EPI_ISL_286068 | EPI_ISL_242689 | EPI_ISL_219110 | EPI_ISL_208576  |
| EPI_ISL_390167 | EPI_ISL_390056 | EPI_ISL_286032 | EPI_ISL_242688 | EPI_ISL_219109 | EPI_ISL_208575  |
| EPI_ISL_390166 | EPI_ISL_390053 | EPI_ISL_286017 | EPI_ISL_242687 | EPI_ISL_219108 | EPI_ISL_203579  |
| EPI_ISL_390165 | EPI_ISL_390052 | EPI_ISL_285884 | EPI_ISL_240342 | EPI_ISL_219107 | EPI_ISL_202115  |
| EPI_ISL_390164 | EPI_ISL_390051 | EPI_ISL_285883 | EPI_ISL_240304 | EPI_ISL_219106 | EPI_ISL_202108  |
| EPI_ISL_390163 | EPI_ISL_390050 | EPI_ISL_285882 | EPI_ISL_239164 | EPI_ISL_219105 | EPI_ISL_202084  |
| EPI_ISL_390162 | EPI_ISL_390049 | EPI_ISL_285881 | EPI_ISL_239163 | EPI_ISL_219104 | EPI_ISL_202083  |
| EPI_ISL_390161 | EPI_ISL_390048 | EPI_ISL_285880 | EPI_ISL_239162 | EPI_ISL_219103 | EPI_ISL_202076  |
| EPI_ISL_390160 | EPI_ISL_390047 | EPI_ISL_283323 | EPI_ISL_238649 | EPI_ISL_219102 | EPI_ISL_202074  |
| EPI_ISL_390159 | EPI_ISL_390031 | EPI_ISL_283322 | EPI_ISL_238626 | EPI_ISL_219101 | EPI_ISL_201636  |
| EPI_ISL_390158 | EPI_ISL_390019 | EPI_ISL_283320 | EPI_ISL_238625 | EPI_ISL_219100 | EPI_ISL_201271  |
| EPI_ISL_390157 | EPI_ISL_386863 | EPI_ISL_283319 | EPI_ISL_238610 | EPI_ISL_219099 | EPI_ISL_201270  |
| EPI_ISL_390156 | EPI_ISL_386852 | EPI_ISL_283318 | EPI_ISL_238609 | EPI_ISL_219098 | EPI_ISL_201269  |
| EPI_ISL_390155 | EPI_ISL_386840 | EPI_ISL_282884 | EPI_ISL_237338 | EPI_ISL_219097 | EPI_ISL_201268  |
| EPI_ISL_390154 | EPI_ISL_386838 | EPI_ISL_282883 | EPI_ISL_235534 | EPI_ISL_219096 | EPI_ISL_201267  |
| EPI_ISL_390153 | EPI_ISL_378074 | EPI_ISL_282882 | EPI_ISL_235533 | EPI_ISL_219095 | EPI_ISL_201266  |
| EPI_ISL_390152 | EPI_ISL_378072 | EPI_ISL_282881 | EPI_ISL_234989 | EPI_ISL_219094 | EPI_ISL_201265  |
| EPI_ISL_390151 | EPI_ISL_378071 | EPI_ISL_282880 | EPI_ISL_233725 | EPI_ISL_219093 | EPI_ISL_201264  |
| EPI_ISL_390150 | EPI_ISL_378070 | EPI_ISL_277846 | EPI_ISL_233472 | EPI_ISL_219092 | EPI_ISL_201263  |
| EPI_ISL_390149 | EPI_ISL_378069 | EPI_ISL_277487 | EPI_ISL_233468 | EPI_ISL_219091 | EPI_ISL_195894  |
| EPI_ISL_390148 | EPI_ISL_378068 | EPI_ISL_277160 | EPI_ISL_233467 | EPI_ISL_219090 | EPI_ISL_968670  |
| EPI_ISL_390147 | EPI_ISL_378066 | EPI_ISL_277159 | EPI_ISL_233466 | EPI_ISL_219089 | EPI_ISL_968668  |
| EPI_ISL_390146 | EPI_ISL_378065 | EPI_ISL_277158 | EPI_ISL_233465 | EPI_ISL_219088 | EPI_ISL_968666  |
| EPI_ISL_390145 | EPI_ISL_378064 | EPI_ISL_277157 | EPI_ISL_233464 | EPI_ISL_219087 | EPI_ISL_968664  |
| EPI_ISL_390144 | EPI_ISL_378063 | EPI_ISL_277156 | EPI_ISL_233463 | EPI_ISL_219086 | EPI_ISL_1064128 |
| EPI_ISL_390143 | EPI_ISL_378062 | EPI_ISL_277155 | EPI_ISL_233462 | EPI_ISL_214521 | EPI_ISL_1064125 |
| EPI_ISL_390142 | EPI_ISL_378060 | EPI_ISL_277154 | EPI_ISL_233460 | EPI_ISL_214520 | EPI_ISL_965036  |
| EPI_ISL_390141 | EPI_ISL_378055 | EPI_ISL_277153 | EPI_ISL_233458 | EPI_ISL_212961 | EPI_ISL_882834  |
| EPI_ISL_390140 | EPI_ISL_368208 | EPI_ISL_277152 | EPI_ISL_233454 | EPI_ISL_212960 | EPI_ISL_882833  |
| EPI_ISL_390086 | EPI_ISL_368185 | EPI_ISL_277151 | EPI_ISL_233453 | EPI_ISL_212959 | EPI_ISL_882832  |
| EPI_ISL_390085 | EPI_ISL_368175 | EPI_ISL_277150 | EPI_ISL_233452 | EPI_ISL_211898 | EPI_ISL_882831  |
| EPI_ISL_390084 | EPI_ISL_368171 | EPI_ISL_277149 | EPI_ISL_233451 | EPI_ISL_211677 | EPI_ISL_882830  |
| EPI_ISL_390083 | EPI_ISL_368161 | EPI_ISL_277148 | EPI_ISL_233450 | EPI_ISL_208637 | EPI_ISL_882829  |
| EPI_ISL_390082 | EPI_ISL_363640 | EPI_ISL_275788 | EPI_ISL_233449 | EPI_ISL_208631 | EPI_ISL_882828  |
| EPI_ISL_390081 | EPI_ISL_363639 | EPI_ISL_275787 | EPI_ISL_233448 | EPI_ISL_208622 | EPI_ISL_882827  |
| EPI_ISL_390080 | EPI_ISL_353448 | EPI_ISL_275786 | EPI_ISL_233446 | EPI_ISL_208617 | EPI_ISL_882826  |
| EPI_ISL_390079 | EPI_ISL_349919 | EPI_ISL_275785 | EPI_ISL_233444 | EPI_ISL_208611 | EPI_ISL_882825  |
| EPI_ISL_390078 | EPI_ISL_340421 | EPI_ISL_275784 | EPI_ISL_233443 | EPI_ISL_208610 | EPI_ISL_882824  |
| EPI_ISL_390077 | EPI_ISL_340405 | EPI_ISL_275783 | EPI_ISL_233440 | EPI_ISL_208596 | EPI_ISL_882823  |
| EPI_ISL_390076 | EPI_ISL_336713 | EPI_ISL_275782 | EPI_ISL_233436 | EPI_ISL_208595 | EPI_ISL_882822  |
| EPI_ISL_390075 | EPI_ISL_334147 | EPI_ISL_275781 | EPI_ISL_233435 | EPI_ISL_208590 | EPI_ISL_882821  |
| EPI_ISL_390074 | EPI_ISL_334145 | EPI_ISL_275779 | EPI_ISL_233432 | EPI_ISL_208586 | EPI_ISL_882820  |
| EPI_ISL_390073 | EPI_ISL_334144 | EPI_ISL_275778 | EPI_ISL_225033 |                |                 |
| EPI_ISL_390072 | EPI_ISL_334143 | EPI_ISL_275777 | EPI_ISL_223995 |                |                 |
| EPI_ISL_390071 | EPI_ISL_333481 | EPI_ISL_275776 | EPI_ISL_223357 |                |                 |
| EPI_ISL_390070 | EPI_ISL_333480 | EPI_ISL_275775 | EPI_ISL_223356 |                |                 |
| EPI_ISL_390068 | EPI_ISL_333442 | EPI_ISL_275774 | EPI_ISL_223355 |                |                 |
| EPI_ISL_390067 | EPI_ISL_333441 | EPI_ISL_275773 | EPI_ISL_220281 |                |                 |
| EPI_ISL_390066 | EPI_ISL_333439 | EPI_ISL_275772 | EPI_ISL_220271 |                |                 |
| EPI_ISL_390065 | EPI_ISL_333438 | EPI_ISL_275771 |                |                |                 |

|                |                |                |                |                |                |
|----------------|----------------|----------------|----------------|----------------|----------------|
| EPI_ISL_882819 | EPI_ISL_409039 | EPI_ISL_398345 | EPI_ISL_336710 | EPI_ISL_330926 | EPI_ISL_283321 |
| EPI_ISL_882818 | EPI_ISL_404753 | EPI_ISL_398344 | EPI_ISL_334154 | EPI_ISL_330490 | EPI_ISL_277300 |
| EPI_ISL_882817 | EPI_ISL_404745 | EPI_ISL_398343 | EPI_ISL_334101 | EPI_ISL_330489 | EPI_ISL_277299 |
| EPI_ISL_882816 | EPI_ISL_402461 | EPI_ISL_398342 | EPI_ISL_333853 | EPI_ISL_330488 | EPI_ISL_277298 |
| EPI_ISL_882815 | EPI_ISL_401016 | EPI_ISL_398340 | EPI_ISL_333457 | EPI_ISL_330485 | EPI_ISL_277273 |
| EPI_ISL_882814 | EPI_ISL_400820 | EPI_ISL_398339 | EPI_ISL_332979 | EPI_ISL_330483 | EPI_ISL_277272 |
| EPI_ISL_882813 | EPI_ISL_400819 | EPI_ISL_398338 | EPI_ISL_332966 | EPI_ISL_330482 | EPI_ISL_277271 |
| EPI_ISL_882812 | EPI_ISL_400802 | EPI_ISL_397176 | EPI_ISL_332965 | EPI_ISL_330476 | EPI_ISL_277270 |
| EPI_ISL_882811 | EPI_ISL_400801 | EPI_ISL_397175 | EPI_ISL_332964 | EPI_ISL_330474 | EPI_ISL_277269 |
| EPI_ISL_882810 | EPI_ISL_400799 | EPI_ISL_397173 | EPI_ISL_332958 | EPI_ISL_330248 | EPI_ISL_968773 |
| EPI_ISL_882809 | EPI_ISL_398844 | EPI_ISL_397170 | EPI_ISL_331045 | EPI_ISL_288498 | EPI_ISL_959654 |
| EPI_ISL_491819 | EPI_ISL_398841 | EPI_ISL_397169 | EPI_ISL_330943 | EPI_ISL_286121 | EPI_ISL_959653 |
| EPI_ISL_491817 | EPI_ISL_398840 | EPI_ISL_357821 | EPI_ISL_330942 | EPI_ISL_286120 | EPI_ISL_959652 |
| EPI_ISL_491816 | EPI_ISL_398839 | EPI_ISL_347909 | EPI_ISL_330941 | EPI_ISL_286119 | EPI_ISL_959651 |
| EPI_ISL_491803 | EPI_ISL_398531 | EPI_ISL_336714 | EPI_ISL_330940 | EPI_ISL_286118 |                |
| EPI_ISL_471531 | EPI_ISL_398530 | EPI_ISL_336712 | EPI_ISL_330939 | EPI_ISL_286061 |                |
| EPI_ISL_430749 | EPI_ISL_398529 | EPI_ISL_336711 | EPI_ISL_330927 | EPI_ISL_286060 |                |

### Selected from India (n=139)

|                |                |                |                 |                |                |
|----------------|----------------|----------------|-----------------|----------------|----------------|
| EPI_ISL_506029 | EPI_ISL_370685 | EPI_ISL_365324 | EPI_ISL_1242039 | EPI_ISL_404741 | EPI_ISL_296431 |
| EPI_ISL_506028 | EPI_ISL_370684 | EPI_ISL_365323 | EPI_ISL_1242033 | EPI_ISL_404740 | EPI_ISL_296429 |
| EPI_ISL_506027 | EPI_ISL_370683 | EPI_ISL_365322 | EPI_ISL_534009  | EPI_ISL_391120 | EPI_ISL_296427 |
| EPI_ISL_506026 | EPI_ISL_370682 | EPI_ISL_365321 | EPI_ISL_412107  | EPI_ISL_391118 | EPI_ISL_296425 |
| EPI_ISL_506025 | EPI_ISL_370681 | EPI_ISL_365320 | EPI_ISL_389146  | EPI_ISL_333866 | EPI_ISL_296074 |
| EPI_ISL_506024 | EPI_ISL_370680 | EPI_ISL_365319 | EPI_ISL_389144  | EPI_ISL_331516 | EPI_ISL_296073 |
| EPI_ISL_506023 | EPI_ISL_370679 | EPI_ISL_365318 | EPI_ISL_389143  | EPI_ISL_331515 | EPI_ISL_296072 |
| EPI_ISL_506022 | EPI_ISL_370678 | EPI_ISL_365317 | EPI_ISL_389142  | EPI_ISL_331514 | EPI_ISL_296071 |
| EPI_ISL_506021 | EPI_ISL_370677 | EPI_ISL_365316 | EPI_ISL_389141  | EPI_ISL_331511 | EPI_ISL_296070 |
| EPI_ISL_506020 | EPI_ISL_368315 | EPI_ISL_365315 | EPI_ISL_389140  | EPI_ISL_329833 | EPI_ISL_296069 |
| EPI_ISL_506019 | EPI_ISL_365338 | EPI_ISL_365314 | EPI_ISL_389139  | EPI_ISL_321889 | EPI_ISL_296068 |
| EPI_ISL_506018 | EPI_ISL_365337 | EPI_ISL_365313 | EPI_ISL_389138  | EPI_ISL_321888 | EPI_ISL_244853 |
| EPI_ISL_506017 | EPI_ISL_365336 | EPI_ISL_365312 | EPI_ISL_389137  | EPI_ISL_321887 | EPI_ISL_244850 |
| EPI_ISL_506016 | EPI_ISL_365335 | EPI_ISL_365311 | EPI_ISL_389136  | EPI_ISL_321886 | EPI_ISL_239657 |
| EPI_ISL_506015 | EPI_ISL_365334 | EPI_ISL_365310 | EPI_ISL_389134  | EPI_ISL_321253 | EPI_ISL_234046 |
| EPI_ISL_506014 | EPI_ISL_365333 | EPI_ISL_365309 | EPI_ISL_389133  | EPI_ISL_321252 | EPI_ISL_233426 |
| EPI_ISL_378290 | EPI_ISL_365332 | EPI_ISL_365308 | EPI_ISL_389132  | EPI_ISL_315777 | EPI_ISL_233425 |
| EPI_ISL_370692 | EPI_ISL_365331 | EPI_ISL_365307 | EPI_ISL_389131  | EPI_ISL_314391 | EPI_ISL_212992 |
| EPI_ISL_370691 | EPI_ISL_365330 | EPI_ISL_365306 | EPI_ISL_389130  | EPI_ISL_314388 | EPI_ISL_212991 |
| EPI_ISL_370690 | EPI_ISL_365329 | EPI_ISL_365305 | EPI_ISL_4373474 | EPI_ISL_311653 |                |
| EPI_ISL_370689 | EPI_ISL_365328 | EPI_ISL_365304 | EPI_ISL_4080564 | EPI_ISL_296437 |                |
| EPI_ISL_370688 | EPI_ISL_365327 | EPI_ISL_365303 | EPI_ISL_1015486 | EPI_ISL_296435 |                |
| EPI_ISL_370687 | EPI_ISL_365326 | EPI_ISL_365302 | EPI_ISL_965037  | EPI_ISL_296434 |                |
| EPI_ISL_370686 | EPI_ISL_365325 | EPI_ISL_365301 | EPI_ISL_404743  | EPI_ISL_296433 |                |

### Selected from Singapore (n=680)

|                |                |                |                |                |                |
|----------------|----------------|----------------|----------------|----------------|----------------|
| EPI_ISL_240801 | EPI_ISL_240797 | EPI_ISL_240793 | EPI_ISL_240789 | EPI_ISL_240785 | EPI_ISL_240781 |
| EPI_ISL_240800 | EPI_ISL_240796 | EPI_ISL_240792 | EPI_ISL_240788 | EPI_ISL_240784 | EPI_ISL_240780 |
| EPI_ISL_240799 | EPI_ISL_240795 | EPI_ISL_240791 | EPI_ISL_240787 | EPI_ISL_240783 | EPI_ISL_240779 |
| EPI_ISL_240798 | EPI_ISL_240794 | EPI_ISL_240790 | EPI_ISL_240786 | EPI_ISL_240782 | EPI_ISL_240778 |

|                |                 |                |                |                |                |
|----------------|-----------------|----------------|----------------|----------------|----------------|
| EPI_ISL_240777 | EPI_ISL_239249  | EPI_ISL_481340 | EPI_ISL_400295 | EPI_ISL_391594 | EPI_ISL_350566 |
| EPI_ISL_240776 | EPI_ISL_239143  | EPI_ISL_481339 | EPI_ISL_400294 | EPI_ISL_391593 | EPI_ISL_350565 |
| EPI_ISL_240775 | EPI_ISL_239142  | EPI_ISL_481338 | EPI_ISL_400293 | EPI_ISL_391592 | EPI_ISL_350563 |
| EPI_ISL_240774 | EPI_ISL_239141  | EPI_ISL_481337 | EPI_ISL_400292 | EPI_ISL_391591 | EPI_ISL_350560 |
| EPI_ISL_240773 | EPI_ISL_239140  | EPI_ISL_481336 | EPI_ISL_400291 | EPI_ISL_391590 | EPI_ISL_350559 |
| EPI_ISL_240772 | EPI_ISL_239139  | EPI_ISL_481335 | EPI_ISL_399036 | EPI_ISL_391588 | EPI_ISL_350558 |
| EPI_ISL_240771 | EPI_ISL_239138  | EPI_ISL_481334 | EPI_ISL_399035 | EPI_ISL_391587 | EPI_ISL_350557 |
| EPI_ISL_240770 | EPI_ISL_239137  | EPI_ISL_401505 | EPI_ISL_399026 | EPI_ISL_391586 | EPI_ISL_350555 |
| EPI_ISL_240769 | EPI_ISL_239136  | EPI_ISL_401505 | EPI_ISL_399021 | EPI_ISL_391585 | EPI_ISL_350554 |
| EPI_ISL_240768 | EPI_ISL_239135  | EPI_ISL_401504 | EPI_ISL_399020 | EPI_ISL_391584 | EPI_ISL_346449 |
| EPI_ISL_240767 | EPI_ISL_239134  | EPI_ISL_401503 | EPI_ISL_398749 | EPI_ISL_391583 | EPI_ISL_346448 |
| EPI_ISL_240766 | EPI_ISL_239132  | EPI_ISL_401502 | EPI_ISL_398748 | EPI_ISL_391582 | EPI_ISL_346447 |
| EPI_ISL_240765 | EPI_ISL_239131  | EPI_ISL_401501 | EPI_ISL_398747 | EPI_ISL_391581 | EPI_ISL_346446 |
| EPI_ISL_239328 | EPI_ISL_239130  | EPI_ISL_401500 | EPI_ISL_398746 | EPI_ISL_391580 | EPI_ISL_346444 |
| EPI_ISL_239327 | EPI_ISL_239129  | EPI_ISL_401499 | EPI_ISL_398745 | EPI_ISL_391579 | EPI_ISL_346443 |
| EPI_ISL_239326 | EPI_ISL_239128  | EPI_ISL_401498 | EPI_ISL_398744 | EPI_ISL_391577 | EPI_ISL_346442 |
| EPI_ISL_239325 | EPI_ISL_239127  | EPI_ISL_401497 | EPI_ISL_398232 | EPI_ISL_391576 | EPI_ISL_346440 |
| EPI_ISL_239323 | EPI_ISL_239126  | EPI_ISL_401494 | EPI_ISL_398231 | EPI_ISL_391575 | EPI_ISL_346439 |
| EPI_ISL_239322 | EPI_ISL_239125  | EPI_ISL_401491 | EPI_ISL_398228 | EPI_ISL_391574 | EPI_ISL_346435 |
| EPI_ISL_239321 | EPI_ISL_239124  | EPI_ISL_401490 | EPI_ISL_398227 | EPI_ISL_391573 | EPI_ISL_346434 |
| EPI_ISL_239320 | EPI_ISL_239123  | EPI_ISL_401489 | EPI_ISL_398225 | EPI_ISL_391572 | EPI_ISL_346433 |
| EPI_ISL_239319 | EPI_ISL_239122  | EPI_ISL_401488 | EPI_ISL_398223 | EPI_ISL_391571 | EPI_ISL_346431 |
| EPI_ISL_239318 | EPI_ISL_239121  | EPI_ISL_401487 | EPI_ISL_398221 | EPI_ISL_350599 | EPI_ISL_346426 |
| EPI_ISL_239317 | EPI_ISL_239120  | EPI_ISL_401469 | EPI_ISL_398220 | EPI_ISL_350598 | EPI_ISL_346425 |
| EPI_ISL_239316 | EPI_ISL_239119  | EPI_ISL_401468 | EPI_ISL_398217 | EPI_ISL_350597 | EPI_ISL_346416 |
| EPI_ISL_239315 | EPI_ISL_239118  | EPI_ISL_401467 | EPI_ISL_398214 | EPI_ISL_350596 | EPI_ISL_346411 |
| EPI_ISL_239314 | EPI_ISL_239117  | EPI_ISL_401466 | EPI_ISL_398211 | EPI_ISL_350595 | EPI_ISL_346407 |
| EPI_ISL_239313 | EPI_ISL_239116  | EPI_ISL_401465 | EPI_ISL_398209 | EPI_ISL_350594 | EPI_ISL_346403 |
| EPI_ISL_239312 | EPI_ISL_239115  | EPI_ISL_401464 | EPI_ISL_398208 | EPI_ISL_350593 | EPI_ISL_346402 |
| EPI_ISL_239311 | EPI_ISL_4061316 | EPI_ISL_401463 | EPI_ISL_398207 | EPI_ISL_350592 | EPI_ISL_346401 |
| EPI_ISL_239310 | EPI_ISL_399304  | EPI_ISL_401462 | EPI_ISL_392653 | EPI_ISL_350591 | EPI_ISL_346399 |
| EPI_ISL_239309 | EPI_ISL_294421  | EPI_ISL_401461 | EPI_ISL_392650 | EPI_ISL_350590 | EPI_ISL_346398 |
| EPI_ISL_239308 | EPI_ISL_294420  | EPI_ISL_401460 | EPI_ISL_392648 | EPI_ISL_350589 | EPI_ISL_346396 |
| EPI_ISL_239307 | EPI_ISL_294419  | EPI_ISL_401459 | EPI_ISL_392647 | EPI_ISL_350588 | EPI_ISL_346395 |
| EPI_ISL_239306 | EPI_ISL_330262  | EPI_ISL_401458 | EPI_ISL_392643 | EPI_ISL_350587 | EPI_ISL_344195 |
| EPI_ISL_239305 | EPI_ISL_330025  | EPI_ISL_400314 | EPI_ISL_392640 | EPI_ISL_350586 | EPI_ISL_344194 |
| EPI_ISL_239304 | EPI_ISL_330024  | EPI_ISL_400313 | EPI_ISL_392639 | EPI_ISL_350585 | EPI_ISL_344193 |
| EPI_ISL_239303 | EPI_ISL_311692  | EPI_ISL_400312 | EPI_ISL_392638 | EPI_ISL_350584 | EPI_ISL_344192 |
| EPI_ISL_239302 | EPI_ISL_311688  | EPI_ISL_400311 | EPI_ISL_392636 | EPI_ISL_350583 | EPI_ISL_344191 |
| EPI_ISL_239301 | EPI_ISL_296168  | EPI_ISL_400310 | EPI_ISL_391678 | EPI_ISL_350582 | EPI_ISL_344190 |
| EPI_ISL_239300 | EPI_ISL_285898  | EPI_ISL_400309 | EPI_ISL_391677 | EPI_ISL_350581 | EPI_ISL_344188 |
| EPI_ISL_239299 | EPI_ISL_285897  | EPI_ISL_400308 | EPI_ISL_391676 | EPI_ISL_350580 | EPI_ISL_344187 |
| EPI_ISL_239298 | EPI_ISL_284191  | EPI_ISL_400307 | EPI_ISL_391675 | EPI_ISL_350579 | EPI_ISL_344186 |
| EPI_ISL_239296 | EPI_ISL_284136  | EPI_ISL_400306 | EPI_ISL_391674 | EPI_ISL_350578 | EPI_ISL_344185 |
| EPI_ISL_239294 | EPI_ISL_277876  | EPI_ISL_400305 | EPI_ISL_391673 | EPI_ISL_350577 | EPI_ISL_340494 |
| EPI_ISL_239293 | EPI_ISL_277146  | EPI_ISL_400304 | EPI_ISL_391672 | EPI_ISL_350576 | EPI_ISL_340493 |
| EPI_ISL_239284 | EPI_ISL_277145  | EPI_ISL_400303 | EPI_ISL_391671 | EPI_ISL_350575 | EPI_ISL_340492 |
| EPI_ISL_239283 | EPI_ISL_275710  | EPI_ISL_400302 | EPI_ISL_391670 | EPI_ISL_350574 | EPI_ISL_340491 |
| EPI_ISL_239282 | EPI_ISL_275709  | EPI_ISL_400301 | EPI_ISL_391669 | EPI_ISL_350573 | EPI_ISL_340490 |
| EPI_ISL_239281 | EPI_ISL_257001  | EPI_ISL_400300 | EPI_ISL_391668 | EPI_ISL_350572 | EPI_ISL_340489 |
| EPI_ISL_239280 | EPI_ISL_257000  | EPI_ISL_400299 | EPI_ISL_391667 | EPI_ISL_350571 | EPI_ISL_340488 |
| EPI_ISL_239279 | EPI_ISL_1655936 | EPI_ISL_400298 | EPI_ISL_391666 | EPI_ISL_350570 | EPI_ISL_340487 |
| EPI_ISL_239251 | EPI_ISL_481342  | EPI_ISL_400297 | EPI_ISL_391596 | EPI_ISL_350569 | EPI_ISL_340486 |
| EPI_ISL_239250 | EPI_ISL_481341  | EPI_ISL_400296 | EPI_ISL_391595 | EPI_ISL_350567 | EPI_ISL_340485 |





|                |                |                |                |                |                |
|----------------|----------------|----------------|----------------|----------------|----------------|
| EPI_ISL_215291 | EPI_ISL_215285 | EPI_ISL_215279 | EPI_ISL_320965 | EPI_ISL_291274 | EPI_ISL_239803 |
| EPI_ISL_215290 | EPI_ISL_215284 | EPI_ISL_215278 | EPI_ISL_320964 | EPI_ISL_269293 | EPI_ISL_219072 |
| EPI_ISL_215289 | EPI_ISL_215283 | EPI_ISL_215277 | EPI_ISL_320963 | EPI_ISL_269292 | EPI_ISL_291290 |
| EPI_ISL_215288 | EPI_ISL_215282 | EPI_ISL_545577 | EPI_ISL_320960 | EPI_ISL_269289 |                |
| EPI_ISL_215287 | EPI_ISL_215281 | EPI_ISL_534303 | EPI_ISL_320959 | EPI_ISL_255431 |                |
| EPI_ISL_215286 | EPI_ISL_215280 | EPI_ISL_514710 | EPI_ISL_299646 | EPI_ISL_239804 |                |

**Selected from Thailand (n=502)**

|                 |                 |                 |                |                |                 |
|-----------------|-----------------|-----------------|----------------|----------------|-----------------|
| EPI_ISL_252429  | EPI_ISL_4069978 | EPI_ISL_4069934 | EPI_ISL_290127 | EPI_ISL_252456 | EPI_ISL_342386  |
| EPI_ISL_252428  | EPI_ISL_4069977 | EPI_ISL_4069933 | EPI_ISL_290126 | EPI_ISL_252455 | EPI_ISL_342385  |
| EPI_ISL_252424  | EPI_ISL_4069976 | EPI_ISL_4069932 | EPI_ISL_290125 | EPI_ISL_252454 | EPI_ISL_342384  |
| EPI_ISL_252423  | EPI_ISL_4069975 | EPI_ISL_4069931 | EPI_ISL_290124 | EPI_ISL_252453 | EPI_ISL_342383  |
| EPI_ISL_252422  | EPI_ISL_4069974 | EPI_ISL_4069930 | EPI_ISL_290123 | EPI_ISL_252452 | EPI_ISL_342382  |
| EPI_ISL_4070017 | EPI_ISL_4069973 | EPI_ISL_4069929 | EPI_ISL_290122 | EPI_ISL_252451 | EPI_ISL_342381  |
| EPI_ISL_4070016 | EPI_ISL_4069972 | EPI_ISL_4064287 | EPI_ISL_290121 | EPI_ISL_252450 | EPI_ISL_342380  |
| EPI_ISL_4070015 | EPI_ISL_4069971 | EPI_ISL_4064286 | EPI_ISL_290103 | EPI_ISL_252449 | EPI_ISL_342373  |
| EPI_ISL_4070014 | EPI_ISL_4069970 | EPI_ISL_4064285 | EPI_ISL_290102 | EPI_ISL_252448 | EPI_ISL_342372  |
| EPI_ISL_4070013 | EPI_ISL_4069969 | EPI_ISL_4064284 | EPI_ISL_290101 | EPI_ISL_252447 | EPI_ISL_342371  |
| EPI_ISL_4070012 | EPI_ISL_4069968 | EPI_ISL_4064283 | EPI_ISL_290100 | EPI_ISL_252446 | EPI_ISL_1367583 |
| EPI_ISL_4070011 | EPI_ISL_4069967 | EPI_ISL_368346  | EPI_ISL_290099 | EPI_ISL_252445 | EPI_ISL_1367582 |
| EPI_ISL_4070010 | EPI_ISL_4069966 | EPI_ISL_368345  | EPI_ISL_290098 | EPI_ISL_252444 | EPI_ISL_1367581 |
| EPI_ISL_4070009 | EPI_ISL_4069965 | EPI_ISL_368341  | EPI_ISL_290097 | EPI_ISL_252443 | EPI_ISL_1367580 |
| EPI_ISL_4070008 | EPI_ISL_4069964 | EPI_ISL_368340  | EPI_ISL_290096 | EPI_ISL_252442 | EPI_ISL_1367579 |
| EPI_ISL_4070007 | EPI_ISL_4069963 | EPI_ISL_368339  | EPI_ISL_290095 | EPI_ISL_252441 | EPI_ISL_1367577 |
| EPI_ISL_4070006 | EPI_ISL_4069962 | EPI_ISL_368338  | EPI_ISL_290094 | EPI_ISL_252440 | EPI_ISL_1367576 |
| EPI_ISL_4070005 | EPI_ISL_4069961 | EPI_ISL_368337  | EPI_ISL_290093 | EPI_ISL_252439 | EPI_ISL_1367575 |
| EPI_ISL_4070004 | EPI_ISL_4069960 | EPI_ISL_290155  | EPI_ISL_290092 | EPI_ISL_252438 | EPI_ISL_1367574 |
| EPI_ISL_4070003 | EPI_ISL_4069959 | EPI_ISL_290154  | EPI_ISL_290091 | EPI_ISL_252437 | EPI_ISL_1367573 |
| EPI_ISL_4070002 | EPI_ISL_4069958 | EPI_ISL_290153  | EPI_ISL_290090 | EPI_ISL_252436 | EPI_ISL_1367572 |
| EPI_ISL_4070001 | EPI_ISL_4069957 | EPI_ISL_290150  | EPI_ISL_290089 | EPI_ISL_252435 | EPI_ISL_1367570 |
| EPI_ISL_4070000 | EPI_ISL_4069956 | EPI_ISL_290149  | EPI_ISL_290088 | EPI_ISL_252434 | EPI_ISL_1367569 |
| EPI_ISL_4069999 | EPI_ISL_4069955 | EPI_ISL_290148  | EPI_ISL_290087 | EPI_ISL_252433 | EPI_ISL_1367568 |
| EPI_ISL_4069998 | EPI_ISL_4069954 | EPI_ISL_290147  | EPI_ISL_290086 | EPI_ISL_252432 | EPI_ISL_1296363 |
| EPI_ISL_4069997 | EPI_ISL_4069953 | EPI_ISL_290146  | EPI_ISL_290085 | EPI_ISL_252431 | EPI_ISL_1296344 |
| EPI_ISL_4069996 | EPI_ISL_4069952 | EPI_ISL_290145  | EPI_ISL_290084 | EPI_ISL_252430 | EPI_ISL_1296343 |
| EPI_ISL_4069995 | EPI_ISL_4069951 | EPI_ISL_290144  | EPI_ISL_290083 | EPI_ISL_252427 | EPI_ISL_1296342 |
| EPI_ISL_4069994 | EPI_ISL_4069950 | EPI_ISL_290143  | EPI_ISL_290082 | EPI_ISL_252426 | EPI_ISL_1296341 |
| EPI_ISL_4069993 | EPI_ISL_4069949 | EPI_ISL_290142  | EPI_ISL_290081 | EPI_ISL_252425 | EPI_ISL_1296340 |
| EPI_ISL_4069992 | EPI_ISL_4069948 | EPI_ISL_290141  | EPI_ISL_290080 | EPI_ISL_403415 | EPI_ISL_1296337 |
| EPI_ISL_4069991 | EPI_ISL_4069947 | EPI_ISL_290140  | EPI_ISL_290079 | EPI_ISL_390922 | EPI_ISL_1296328 |
| EPI_ISL_4069990 | EPI_ISL_4069946 | EPI_ISL_290139  | EPI_ISL_290078 | EPI_ISL_390921 | EPI_ISL_1296327 |
| EPI_ISL_4069989 | EPI_ISL_4069945 | EPI_ISL_290138  | EPI_ISL_290077 | EPI_ISL_390920 | EPI_ISL_1296326 |
| EPI_ISL_4069988 | EPI_ISL_4069944 | EPI_ISL_290137  | EPI_ISL_290076 | EPI_ISL_390919 | EPI_ISL_1296323 |
| EPI_ISL_4069987 | EPI_ISL_4069943 | EPI_ISL_290136  | EPI_ISL_290075 | EPI_ISL_390918 | EPI_ISL_1296321 |
| EPI_ISL_4069986 | EPI_ISL_4069942 | EPI_ISL_290135  | EPI_ISL_252464 | EPI_ISL_390917 | EPI_ISL_1296319 |
| EPI_ISL_4069985 | EPI_ISL_4069941 | EPI_ISL_290134  | EPI_ISL_252463 | EPI_ISL_390916 | EPI_ISL_1296318 |
| EPI_ISL_4069984 | EPI_ISL_4069940 | EPI_ISL_290133  | EPI_ISL_252462 | EPI_ISL_390915 | EPI_ISL_416794  |
| EPI_ISL_4069983 | EPI_ISL_4069939 | EPI_ISL_290132  | EPI_ISL_252461 | EPI_ISL_390914 | EPI_ISL_409064  |
| EPI_ISL_4069982 | EPI_ISL_4069938 | EPI_ISL_290131  | EPI_ISL_252460 | EPI_ISL_390913 | EPI_ISL_409062  |
| EPI_ISL_4069981 | EPI_ISL_4069937 | EPI_ISL_290130  | EPI_ISL_252459 | EPI_ISL_390912 | EPI_ISL_409061  |
| EPI_ISL_4069980 | EPI_ISL_4069936 | EPI_ISL_290129  | EPI_ISL_252458 | EPI_ISL_390911 | EPI_ISL_409060  |
| EPI_ISL_4069979 | EPI_ISL_4069935 | EPI_ISL_290128  | EPI_ISL_252457 | EPI_ISL_342387 | EPI_ISL_409059  |

|                |                |                |                |                |                |
|----------------|----------------|----------------|----------------|----------------|----------------|
| EPI_ISL_409058 | EPI_ISL_349731 | EPI_ISL_329807 | EPI_ISL_256131 | EPI_ISL_197515 | EPI_ISL_322724 |
| EPI_ISL_409057 | EPI_ISL_349719 | EPI_ISL_329806 | EPI_ISL_249991 | EPI_ISL_197507 | EPI_ISL_322723 |
| EPI_ISL_409056 | EPI_ISL_349706 | EPI_ISL_329805 | EPI_ISL_249990 | EPI_ISL_197506 | EPI_ISL_322722 |
| EPI_ISL_409055 | EPI_ISL_341176 | EPI_ISL_329804 | EPI_ISL_249989 | EPI_ISL_197500 | EPI_ISL_322721 |
| EPI_ISL_409053 | EPI_ISL_341174 | EPI_ISL_329803 | EPI_ISL_249988 | EPI_ISL_197498 | EPI_ISL_322720 |
| EPI_ISL_409052 | EPI_ISL_341171 | EPI_ISL_329802 | EPI_ISL_249987 | EPI_ISL_197261 | EPI_ISL_322719 |
| EPI_ISL_409051 | EPI_ISL_341170 | EPI_ISL_329798 | EPI_ISL_249986 | EPI_ISL_197260 | EPI_ISL_299692 |
| EPI_ISL_409050 | EPI_ISL_341169 | EPI_ISL_329797 | EPI_ISL_249985 | EPI_ISL_197259 | EPI_ISL_299691 |
| EPI_ISL_398985 | EPI_ISL_341164 | EPI_ISL_305011 | EPI_ISL_249984 | EPI_ISL_197257 | EPI_ISL_299683 |
| EPI_ISL_398961 | EPI_ISL_341163 | EPI_ISL_303255 | EPI_ISL_249983 | EPI_ISL_718128 | EPI_ISL_299682 |
| EPI_ISL_395123 | EPI_ISL_341053 | EPI_ISL_303251 | EPI_ISL_249982 | EPI_ISL_644654 | EPI_ISL_299645 |
| EPI_ISL_395122 | EPI_ISL_341052 | EPI_ISL_303248 | EPI_ISL_249981 | EPI_ISL_644653 | EPI_ISL_299644 |
| EPI_ISL_394957 | EPI_ISL_341051 | EPI_ISL_303244 | EPI_ISL_249980 | EPI_ISL_644651 | EPI_ISL_299601 |
| EPI_ISL_394956 | EPI_ISL_341050 | EPI_ISL_303222 | EPI_ISL_232109 | EPI_ISL_644650 | EPI_ISL_299600 |
| EPI_ISL_390101 | EPI_ISL_341049 | EPI_ISL_303152 | EPI_ISL_230294 | EPI_ISL_644649 | EPI_ISL_275192 |
| EPI_ISL_390100 | EPI_ISL_341048 | EPI_ISL_303151 | EPI_ISL_230293 | EPI_ISL_583901 | EPI_ISL_274948 |
| EPI_ISL_390099 | EPI_ISL_341047 | EPI_ISL_303150 | EPI_ISL_230292 | EPI_ISL_453806 | EPI_ISL_274947 |
| EPI_ISL_386870 | EPI_ISL_341046 | EPI_ISL_300804 | EPI_ISL_230291 | EPI_ISL_453805 | EPI_ISL_274946 |
| EPI_ISL_386869 | EPI_ISL_333865 | EPI_ISL_300215 | EPI_ISL_230290 | EPI_ISL_453804 | EPI_ISL_249245 |
| EPI_ISL_386866 | EPI_ISL_333864 | EPI_ISL_300214 | EPI_ISL_230289 | EPI_ISL_419280 | EPI_ISL_249244 |
| EPI_ISL_386865 | EPI_ISL_333863 | EPI_ISL_299955 | EPI_ISL_230288 | EPI_ISL_419279 | EPI_ISL_249243 |
| EPI_ISL_386864 | EPI_ISL_333862 | EPI_ISL_299953 | EPI_ISL_225034 | EPI_ISL_410165 | EPI_ISL_249242 |
| EPI_ISL_386857 | EPI_ISL_333857 | EPI_ISL_299959 | EPI_ISL_219116 | EPI_ISL_406833 | EPI_ISL_249208 |
| EPI_ISL_386843 | EPI_ISL_333854 | EPI_ISL_299952 | EPI_ISL_213017 | EPI_ISL_406832 | EPI_ISL_249190 |
| EPI_ISL_386841 | EPI_ISL_331518 | EPI_ISL_277539 | EPI_ISL_213016 | EPI_ISL_406828 | EPI_ISL_249189 |
| EPI_ISL_386839 | EPI_ISL_331077 | EPI_ISL_277538 | EPI_ISL_213015 | EPI_ISL_406827 | EPI_ISL_249188 |
| EPI_ISL_386836 | EPI_ISL_331073 | EPI_ISL_277537 | EPI_ISL_213014 | EPI_ISL_406822 | EPI_ISL_249187 |
| EPI_ISL_386835 | EPI_ISL_331072 | EPI_ISL_277536 | EPI_ISL_213011 | EPI_ISL_406820 | EPI_ISL_249156 |
| EPI_ISL_353511 | EPI_ISL_331065 | EPI_ISL_277535 | EPI_ISL_212972 | EPI_ISL_406819 | EPI_ISL_246671 |
| EPI_ISL_350086 | EPI_ISL_331064 | EPI_ISL_277534 | EPI_ISL_211928 | EPI_ISL_405960 | EPI_ISL_246670 |
| EPI_ISL_350081 | EPI_ISL_331052 | EPI_ISL_277531 | EPI_ISL_211923 | EPI_ISL_405959 | EPI_ISL_234170 |
| EPI_ISL_350079 | EPI_ISL_331051 | EPI_ISL_277530 | EPI_ISL_211922 | EPI_ISL_339069 | EPI_ISL_234160 |
| EPI_ISL_349982 | EPI_ISL_331047 | EPI_ISL_277526 | EPI_ISL_211921 | EPI_ISL_339066 | EPI_ISL_209066 |
| EPI_ISL_349732 | EPI_ISL_330902 | EPI_ISL_277514 | EPI_ISL_211920 | EPI_ISL_323049 | EPI_ISL_209065 |
| EPI_ISL_349924 | EPI_ISL_330028 | EPI_ISL_277492 | EPI_ISL_211900 | EPI_ISL_322738 | EPI_ISL_197939 |
| EPI_ISL_349915 | EPI_ISL_330027 | EPI_ISL_277491 | EPI_ISL_211899 | EPI_ISL_322737 | EPI_ISL_197936 |
| EPI_ISL_349762 | EPI_ISL_330014 | EPI_ISL_277486 | EPI_ISL_197529 | EPI_ISL_322736 | EPI_ISL_197935 |
| EPI_ISL_349736 | EPI_ISL_330012 | EPI_ISL_277485 | EPI_ISL_197523 | EPI_ISL_322735 | EPI_ISL_197934 |
| EPI_ISL_349735 | EPI_ISL_329809 | EPI_ISL_277484 | EPI_ISL_197520 | EPI_ISL_322730 |                |
| EPI_ISL_349733 | EPI_ISL_329808 | EPI_ISL_256132 | EPI_ISL_197518 | EPI_ISL_322725 |                |

## References

- 1 Xia, J. *et al.* Comparative epidemiology, phylogenetics, and transmission patterns of severe influenza A/H3N2 in Australia from 2003 to 2017. *Influenza Other Respir Viruses* **14**, 700-709, doi:10.1111/irv.12772 (2020).
- 2 Agustini, A. *et al.* Evolutionary study and phylodynamic pattern of human influenza A/H3N2 virus in Indonesia from 2008 to 2010. *PLoS One* **13**, e0201427, doi:10.1371/journal.pone.0201427 (2018).
- 3 Kim, J. I. *et al.* Phylogenetic relationships of the HA and NA genes between vaccine and seasonal influenza A(H3N2) strains in Korea. *PLoS One* **12**, e0172059, doi:10.1371/journal.pone.0172059 (2017).
- 4 Müller, N. F. *et al.* Characterising the epidemic spread of influenza A/H3N2 within a city through phylogenetics. *PLoS Pathog* **16**, e1008984, doi:10.1371/journal.ppat.1008984 (2020).
- 5 Al Khatib, H. A., Al Thani, A. A., Gallouzi, I. & Yassine, H. M. Epidemiological and genetic characterization of pH1N1 and H3N2 influenza viruses circulated in MENA region during 2009-2017. *BMC infectious diseases* **19**, 314, doi:10.1186/s12879-019-3930-6 (2019).
- 6 Adabor, E. S. Anticipating time-dependent antigenic variants of influenza A (H3N2) viruses. *Infection, genetics and evolution : journal of molecular epidemiology and evolutionary genetics in infectious diseases* **67**, 67-72, doi:10.1016/j.meegid.2018.10.028 (2019).
- 7 Nyang'au, E. M., Bulimo, W. D., Mobegi, V., Opanda, S. & Magiri, E. Genetic analysis of HA1 domain of influenza A/H3N2 viruses isolated in Kenya during the 2007-2013 seasons reveal significant divergence from WHO-recommended vaccine strains. *International journal of infectious diseases : IJID : official publication of the International Society for Infectious Diseases* **95**, 413-420, doi:10.1016/j.ijid.2020.04.001 (2020).
- 8 Westgeest, K. B. *et al.* Genomewide analysis of reassortment and evolution of human influenza A (H3N2) viruses circulating between 1968 and 2011. *Journal of virology* **88**, 2844-2857 (2014).
